# Supplementary material for: The effects of ERN1 on gene expression during early rhizobial infection in Lotus japonicus
Source: Frontiers journal article supplement (doi:10.3389/fpls.2022.995589), 2023-01-17
Supplement: Data_Sheet_1.zip [file Supplementary Tables.XLSX]

## Sheet: Table_S1
Table S1 Rhizobial infection-induced DEGs in WT
MG20_ID	logFC			Gifu_ID	Description
	1 dpi	2 dpi	3 dpi				Legend	LjXgXvXXXXXXX	Duplicated ID according to Gifu genome
Lj0g3v0256609	0.718056	0.55674	0.446738	LotjaGi3g1v0129400	Beta-hexosaminidase subunit beta			LjXgXvXXXXXXX	Not found in Gifu genome
Lj2g3v1014300	0.935912	0.541367	0.460006	LotjaGi2g1v0247400	INTERFERON-GAMMA INDUCIBLE PROTEIN-RELATED
Lj0g3v0347439	0.697395	0.384117	0.00337174	LotjaGi4g1v0390300	CATIONIC AMINO ACID TRANSPORTER
Lj0g3v0347449	0.698011	0.372638	0.0144924	LotjaGi4g1v0390300	CATIONIC AMINO ACID TRANSPORTER
Lj2g3v3149230	0.581187	0.485194	0.443075	LotjaGi1g1v0033900	NA
Lj2g3v3184270	0.591544	0.391585	0.253585	LotjaGi1g1v0027100	Rab3 GTPase-activating protein
Lj0g3v0134529	1.03389	0.466793	0.203214	LotjaGi2g1v0061300	NA
Lj1g3v2727080	0.653789	0.441971	0.501703	LotjaGi1g1v0478800	Nbs-lrr resistance protein (Fragment)
Lj2g3v1374500	0.793929	0.546747	0.319931	LotjaGi2g1v0315300	DUF4228
Lj4g3v0793350	0.655148	0.549391	0.496043	LotjaGi4g1v0098700	Natural resistance-associated macrophage protein
Lj3g3v2994560	0.636726	0.459481	0.460266	LotjaGi3g1v0477400	Basic-leucine zipper domain
Lj0g3v0355859	2.21207	1.04477	1.11743	LotjaGi5g1v0144500	Cytochrome P450
Lj6g3v2255720	0.824697	0.505155	0.52775	LotjaGi6g1v0357200	Basic-leucine zipper domain
Lj2g3v1989220	1.00052	0.550794	0.538359	LotjaGi2g1v0420800	NUDIX hydrolase domain
Lj1g3v2659360	1.12901	0.406132	0.239202	LotjaGi1g1v0476400	RopGEF3
Lj4g3v0911380	0.691717	0.551533	0.518127	LotjaGi4g1v0114000	HOMEOBOX_2
Lj3g3v3500200	1.85712	0.458809	-0.582393	LotjaGi3g1v0524700	Oxoglutarate/iron-dependent dioxygenase
Lj4g3v1599280	0.708137	0.522072	0.483338	LotjaGi4g1v0244100	ATPase
Lj0g3v0286499	0.687144	0.256539	0.218174	LotjaGi5g1v0038300	Domain of unknown function DUF221
Lj2g3v0693500	0.669769	0.499435	0.513792	LotjaGi2g1v0201700	COPPER TRANSPORT PROTEIN ATOX1-RELATED
Lj6g3v0412680	0.591664	0.477957	0.551297	LotjaGi6g1v0056100	Myb domain
Lj1g3v2808120	0.590227	0.465398	0.348486	LotjaGi1g1v0482900	NA
Lj0g3v0076609	0.606636	0.509804	0.549257	LotjaGi1g1v0541400	Hyoscyamine 6 beta-hydroxylase (Fragment)
Lj6g3v0326340	0.588134	0.336628	0.215491	LotjaGi6g1v0042900	Cytochrome P450
Lj0g3v0113379	0.604422	0.425599	0.322511	LotjaGi1g1v0542400	2014-03-03
Lj0g3v0346469	1.24178	0.608602	0.623846	LotjaGi4g1v0354900	Oxoglutarate/iron-dependent dioxygenase
Lj3g3v1131230	0.611334	0.435999	0.319102	LotjaGi3g1v0172000	NA
Lj5g3v0469110	0.621657	0.496648	0.306368	LotjaGi5g1v0048400	NA
Lj3g3v3500050	0.7722	0.531056	0.493268	LotjaGi3g1v0523500	Phospholipase C
Lj0g3v0265999	0.661265	0.50388	0.559879	LotjaGi3g1v0031100	Transcription factor GRAS
Lj3g3v0370370	0.661264	0.503879	0.559878	LotjaGi3g1v0031100	Transcription factor GRAS
Lj0g3v0112279	3.07525	1.82825	0.400546	NA	NA
Lj0g3v0085739	0.790065	0.303985	-0.0182037	LotjaGi3g1v0168300	NA
Lj1g3v3444280	0.617726	0.359037	0.106867	LotjaGi1g1v0579900	Myb domain
Lj0g3v0140849	0.748879	0.273963	0.162683	LotjaGi5g1v0038300	NA
Lj2g3v0716040	0.602275	0.253019	0.349903	LotjaGi2g1v0204400	Protein kinase
Lj0g3v0179649	0.649796	0.48805	0.180592	LotjaGi5g1v0143100	NA
Lj0g3v0292089	0.591142	0.513119	0.499035	LotjaGi1g1v0543000	Actin 2
Lj1g3v4626570	0.718445	0.565718	0.228543	LotjaGi1g1v0686700	Protein of unknown function DUF1624
Lj0g3v0352099	1.12575	0.602226	0.422823	LotjaGi1g1v0087400	Zinc finger, C2H2
Lj0g3v0301439	2.98994	1.99663	1.7075	NA	NA
Lj4g3v2139640	0.584759	0.305726	0.161987	LotjaGi4g1v0307100	Ring-hydroxylating dioxygenase, large terminal subunit
Lj0g3v0041889	1.08675	0.503244	0.449489	LotjaGi3g1v0103200	NA
Lj0g3v0075159	0.757216	0.387313	0.348339	LotjaGi4g1v0304700	ATPase
Lj2g3v1292140	0.595204	0.537324	0.388543	LotjaGi2g1v0305600	Mog1p/PsbP-like
Lj3g3v2926270	0.626056	0.438646	0.285378	LotjaGi3g1v0470000	NA
Lj0g3v0133769	0.871091	0.414557	0.56247	LotjaGi4g1v0304700	ATPase
Lj0g3v0162709	3.73687	2.68969	1.83886	LotjaGi1g1v0626200	NA
Lj1g3v5036110	0.637534	0.517253	0.489547	LotjaGi1g1v0794100	NA
Lj3g3v1959030	0.668153	0.4135	0.279517	LotjaGi3g1v0227000	NA
Lj3g3v1959040	0.668394	0.413836	0.279705	LotjaGi3g1v0227000	NA
Lj4g3v2225710	0.709346	0.455647	0.398991	LotjaGi4g1v0316500	NA
Lj3g3v3362010	0.609038	0.558868	0.373641	LotjaGi3g1v0509700	NA
Lj4g3v0758330	1.45382	0.622255	0.188437	LotjaGi1g1v0137200	NA
Lj1g3v0913300	0.636063	0.32685	0.0310516	LotjaGi1g1v0274400	NA
Lj0g3v0308459	2.04372	1.19811	0.636689	LotjaGi3g1v0548600	Verticillium wilt resistance-like protein
Lj3g3v2718780	0.604867	0.448905	0.430871	LotjaGi3g1v0023000	NA
Lj0g3v0206119	0.650741	0.54115	0.457758	LotjaGi3g1v0231300	NA
Lj2g3v1024160	0.701607	0.376972	0.512715	LotjaGi2g1v0254900	ATPase
Lj0g3v0282749	4.84499	3.39857	3.47233	LotjaGi3g1v0050500	NA
Lj0g3v0192339	0.618235	0.240695	0.158513	LotjaGi4g1v0120600	Cytochrome P450
Lj4g3v0335850	0.802882	0.483715	0.255971	NA	GAG-POL-RELATED RETROTRANSPOSON
Lj4g3v0365650	0.610684	0.420641	0.380876	LotjaGi4g1v0038400	RING-H2 finger protein ATL1O
Lj3g3v0428350	0.779511	0.471907	0.0708649	NA	Zinc finger, BED-type
Lj3g3v0428360	0.779511	0.471907	0.0708649	NA	NA
Lj0g3v0338599	0.624978	0.50989	0.541382	LotjaGi3g1v0375800	Zinc finger, RING/FYVE/PHD-type
Lj0g3v0206129	0.659845	0.552557	0.460251	LotjaGi3g1v0231200	NA
Lj0g3v0228729	0.733133	0.485996	0.400716	LotjaGi1g1v0331100	NA
Lj0g3v0253889	1.03817	0.74632	0.64686	LotjaGi3g1v0351700	AP2/ERF
Lj1g3v2922980	0.920235	0.616277	0.58913	LotjaGi1g1v0399900	NA
Lj1g3v2036610	0.821094	0.552645	0.410989	NA	Ribonuclease H-like domain
Lj0g3v0114499	2.45712	1.58473	1.12052	NA	NA
Lj4g3v1936640	0.586716	0.407929	0.404043	LotjaGi4g1v0279800	NA
Lj0g3v0076289	2.45581	1.9508	1.596	NA	NA
Lj1g3v1386720	0.681862	0.381341	0.371176	LotjaGi1g1v0331100	NA
Lj6g3v2256790	1.17456	0.737236	0.629359	LotjaGi6g1v0357600	Protein kinase
Lj1g3v4578900	1.01142	0.61199	0.56603	LotjaGi1g1v0694500	NA
Lj5g3v0691290	2.17733	1.66995	1.02081	NA	Envelope glycoprotein (Fragment)
Lj0g3v0247049	1.63236	0.993172	0.596837	LotjaGi2g1v0287300	Class Ia chitinase
Lj0g3v0194759	2.23575	1.18117	0.82273	NA	Ribonuclease H-like
Lj0g3v0117929	0.626315	0.441802	0.47099	LotjaGi1g1v0478800	BS resistance protein
Lj0g3v0354889	0.639619	0.427757	0.426642	LotjaGi3g1v0464600	NA
Lj0g3v0070129	0.991811	0.565585	0.61739	NA	NA
Lj1g3v2098290	0.819254	0.497471	0.00216351	LotjaGi1g1v0414300	NA
Lj1g3v0913310	0.580144	0.2296	0.00753948	NA	NA
Lj0g3v0008839	0.702701	0.330954	0.493963	LotjaGi6g1v0340900	Protein kinase
Lj0g3v0103199	1.04529	0.175798	-0.0647941	NA	NA
Lj1g3v2038820	0.790377	0.549017	0.397188	NA	NA
Lj1g3v1932600	0.622081	0.417298	0.470773	LotjaGi1g1v0390600	Zinc finger, CHY-type
Lj5g3v2013980	2.1899	1.47142	1.60443	NA	CLE10 protein
Lj0g3v0012679	0.831723	0.622966	0.49901	LotjaGi1g1v0301500	Ribosomal protein L6
Lj0g3v0360899	0.644322	0.413998	0.351393	LotjaGi6g1v0061100	NA
Lj2g3v1681040	0.969693	0.702261	0.470844	LotjaGi2g1v0379900	His Kinase A (phosphoacceptor) domain
Lj1g3v1182070	0.958668	0.671867	0.283746	NA	NA
Lj2g3v1669700	0.804635	0.605847	0.518056	NA	Ribonuclease H-like
Lj6g3v1953990	0.692609	0.46956	0.367663	NA	NA
Lj2g3v1467930	1.26995	0.902205	0.455549	LotjaGi2g1v0330600	NA
Lj0g3v0277789	0.877005	0.607899	0.413621	NA	NA
Lj0g3v0117939	0.605712	0.450447	0.448858	LotjaGi1g1v0478800	Resistance gene analog NBS7 (Fragment)
Lj1g3v1091330	1.42872	0.700785	0.445819	NA	NA
Lj1g3v5010630	0.643499	0.35593	0.365037	NA	NON-LTR RETROELEMENT REVERSE TRANSCRIPTASE RELATED
Lj1g3v2922970	0.838417	0.559882	0.301325	NA	RVT_2,Reverse
Lj3g3v0428370	0.990035	0.39671	0.0219477	NA	NA
Lj4g3v2715930	0.689227	0.494856	0.357989	LotjaGi4g1v0389700	Serine protease aprX
Lj4g3v1855730	1.4728	1.16272	0.335361	LotjaGi4g1v0268200	Early nodulin 93
Lj0g3v0346119	0.636039	0.452477	0.120348	LotjaGi3g1v0482100	TESTIS-SPECIFIC Y-ENCODED PROTEIN
Lj3g3v0765990	0.600538	0.573692	0.206185	LotjaGi3g1v0110700	CheY-like
Lj0g3v0264249	0.646251	0.37738	0.311648	NA	NA
Lj0g3v0331109	1.21955	0.829488	0.757411	LotjaGi3g1v0213100	TIR-NBS-LRR RCT1 resistance protein
Lj0g3v0297099	1.13282	0.74429	0.739145	NA	NA
Lj0g3v0297089	1.13282	0.744289	0.740098	NA	Cytochrome c assembly protein
Lj3g3v2719910	0.58787	0.34485	0.45207	LotjaGi3g1v0429100	NITRATE, FROMATE, IRON DEHYDROGENASE
Lj1g3v3975870	1.04948	0.662308	0.0348479	NA	NA
Lj6g3v1903460	0.622811	0.190767	0.245508	LotjaGi6g1v0303300	NA
Lj2g3v1536130	2.51736	2.04836	0.949679	NA	NA
Lj0g3v0264239	0.640146	0.372864	0.306746	NA	NA
Lj0g3v0042209	1.15437	0.91767	0.903666	NA	NA
Lj0g3v0023839	0.625936	0.373073	0.414441	LotjaGi3g1v0401200	Protein kinase
Lj1g3v4551290	0.596298	-0.124276	0.122377	LotjaGi1g1v0699100	Ion channel regulatory protein
Lj2g3v1198820	1.16807	0.570084	0.337619	NA	NA
Lj6g3v2116820	0.61947	0.308084	0.497412	LotjaGi6g1v0340900	NA
Lj0g3v0347469	3.18451	1.85905	1.56623	NA	NA
Lj0g3v0193869	0.618904	0.322742	0.361855	LotjaGi3g1v0080300	Protein kinase
Lj2g3v2089570	1.66725	1.12789	0.816491	LotjaGi2g1v0443000	Sad1/UNC-like
Lj1g3v1008870	0.803421	0.319975	0.0863165	LotjaGi1g1v0290500	NA
Lj0g3v0059969	1.60828	1.06932	1.23216	NA	NA
Lj6g3v1722690	1.60828	1.06932	1.23216	NA	NA
Lj0g3v0256069	0.813022	0.495089	0.463053	NA	NA
Lj4g3v1683330	0.730418	0.0732076	0.36699	LotjaGi4g1v0253300	Zinc finger, C2H2-like
Lj4g3v1202280	0.685839	0.154531	0.00706053	LotjaGi4g1v0194400	CATIONIC AMINO ACID TRANSPORTER
Lj4g3v0424260	0.817477	0.571072	0.42772	LotjaGi4g1v0047000	NA
Lj0g3v0129589	0.717119	0.445479	0.284832	LotjaGi3g1v0387000	NA
Lj0g3v0334529	1.91835	1.44802	0.9223	NA	NA
Lj5g3v0746970	2.64273	2.31806	1.28843	NA	GAG-POL-RELATED RETROTRANSPOSON
Lj1g3v4551310	0.897784	0.296898	0.231332	LotjaGi1g1v0699000	UNC-93A-RELATED
Lj1g3v0129160	0.698874	0.545506	0.192145	NA	Chalcone synthase
Lj0g3v0207139	0.701908	0.191268	0.218553	LotjaGi4g1v0128800	Thaumatin, pathogenesis-related
Lj6g3v1468270	1.15349	0.941309	0.924954	LotjaGi6g1v0252200	Sucrose synthase
Lj0g3v0144569	0.844919	0.141541	0.0929675	LotjaGi6g1v0281100	NBS-containing resistance-like protein
Lj1g3v1932610	0.766945	0.429142	0.441161	NA	NA
Lj1g3v4865400	1.07292	0.458619	0.884026	NA	NA
Lj3g3v2477720	1.24209	0.466424	0.699284	LotjaGi3g1v0398800	NA
Lj6g3v2083600	1.02697	0.277797	0.262211	LotjaGi6g1v0339100	NA
Lj1g3v1008880	0.870785	0.242079	0.0646529	NA	NA
Lj0g3v0353399	0.759091	0.415344	-0.096873	LotjaGi1g1v0273100	NA
Lj2g3v3210780	0.604354	0.220443	-0.108069	LotjaGi1g1v0024000	NA
Lj6g3v2017370	0.833137	0.649043	0.652322	NA	NA
Lj0g3v0188639	5.12239	4.32771	3.21118	NA	NA
Lj0g3v0300429	0.762122	0.316034	0.578601	LotjaGi1g1v0543100	NA
Lj2g3v1550400	0.795435	0.389447	0.31839	LotjaGi2g1v0347700	Methyl-accepting chemotaxis protein
Lj0g3v0311079	1.48471	1.02319	0.920447	NA	NON-LTR RETROELEMENT REVERSE TRANSCRIPTASE RELATED
Lj1g3v1318260	1.48389	1.24252	1.2781	LotjaGi4g1v0409700	Armadillo-like helical
Lj4g3v2742790	1.48389	1.24252	1.2781	LotjaGi4g1v0409700	U-box domain-containing protein
Lj2g3v2125170	1.04201	0.86643	0.286641	NA	NA
Lj2g3v1985180	1.56225	0.904743	-0.338193	NA	Cytochrome P450
Lj5g3v1356090	1.25916	0.920098	0.352425	LotjaGi3g1v0435600	NA
Lj1g3v2625970	0.713977	0.521486	0.226001	NA	NA
Lj0g3v0135319	1.62991	0.591106	1.27586	NA	NA
Lj1g3v0129250	0.599567	0.408977	-0.0457571	NA	NA
Lj0g3v0241759	2.32173	2.11022	1.15035	NA	NA
Lj1g3v2183120	1.65906	1.10305	1.3864	NA	NA
Lj3g3v2890760	0.896578	0.728114	0.729098	LotjaGi3g1v0464000	Heme-dependent peroxidases
Lj0g3v0265979	0.846285	0.5052	0.724101	LotjaGi1g1v0195800	nucleolin
Lj0g3v0241829	1.19053	0.630808	0.873712	NA	NA
Lj4g3v2882190	0.673212	0.541559	0.575265	LotjaGi4g1v0419800	No apical meristem (NAM) protein
Lj0g3v0362349	0.59187	-0.00881186	0.0887208	LotjaGi1g1v0480900	NA
Lj6g3v1052240	0.769031	0.627051	0.366057	NA	NA
Lj1g3v3834150	1.52873	1.19963	1.40799	NA	Reverse
Lj1g3v0129230	0.583509	0.391538	-0.0593046	NA	NA
Lj2g3v2125180	0.583509	0.391538	-0.0593046	NA	NA
Lj0g3v0080979	0.772408	0.531539	0.412241	LotjaGi1g1v0749700	Ubiquitin-protein ligase
Lj0g3v0355849	0.924634	0.349982	0.432446	NA	NA
Lj6g3v1371850	0.602218	0.456727	0.115965	NA	NA
Lj1g3v0129240	0.583716	0.393302	-0.0637536	NA	NA
Lj1g3v3716720	0.583716	0.393302	-0.0637536	NA	NA
Lj2g3v2125190	0.583716	0.393302	-0.0637536	NA	NA
Lj0g3v0305009	2.34517	1.14187	2.08473	NA	NA
Lj2g3v1193160	1.52938	1.23609	1.27081	LotjaGi2g1v0285200	Zinc finger, RING/FYVE/PHD-type
Lj3g3v1407570	0.788295	0.580207	0.590622	NA	Gag-pol polyprotein
Lj2g3v2089580	1.6094	1.15967	0.780268	LotjaGi2g1v0443000	Galactose-binding domain-like
Lj0g3v0171189	1.38431	1.25933	0.392993	NA	NA
Lj0g3v0271899	0.936163	0.791009	0.6923	NA	NA
Lj4g3v1881700	1.13738	0.322659	-0.405903	NA	NA
Lj2g3v2125130	0.678304	0.599426	0.1757	NA	NA
Lj1g3v2923000	1.06929	0.864393	0.76256	LotjaGi6g1v0319400	Domain of unknown function DUF4219
Lj1g3v4483460	0.587519	0.49303	0.251651	NA	NA
Lj4g3v1151760	0.676481	0.433899	0.141825	LotjaGi4g1v0189600	NA
Lj0g3v0349439	0.760929	0.480631	0.080499	LotjaGi3g1v0212100	G8 domain-containing protein
Lj4g3v1085060	1.18235	0.901985	0.946003	LotjaGi4g1v0155900	Major facilitator superfamily
Lj4g3v0341200	1.48681	1.20231	1.35123	LotjaGi4g1v0035500	Peptidase C14
Lj1g3v4717330	1.32053	0.904816	0.998945	NA	NA
Lj0g3v0277199	2.49556	2.15834	1.62003	LotjaGi3g1v0050000	COP1-INTERACTING PROTEIN-RELATED
Lj0g3v0326579	1.16667	0.525682	0.917313	LotjaGi1g1v0154600	NA
Lj2g3v2017460	0.792805	0.396013	-0.305376	LotjaGi2g1v0432500	Thaumatin
Lj0g3v0020249	1.65445	1.23468	1.33462	NA	NA
Lj2g3v0636030	1.14632	0.0766127	0.176163	LotjaGi2g1v0189100	SERPIN-RELATED
Lj0g3v0341239	0.886917	0.793284	0.757585	LotjaGi6g1v0257800	NA
Lj1g3v0129070	0.650883	0.523066	0.0344501	NA	NA
Lj2g3v2314880	0.842101	-0.192614	-0.779763	LotjaGi1g1v0116600	Acyl-CoA N-acyl
Lj1g3v0465620	0.92819	0.81056	0.810287	LotjaGi1g1v0215700	WRKY
Lj0g3v0158129	1.21132	0.846006	0.891252	LotjaGi1g1v0490600	NA
Lj0g3v0302679	1.21132	0.846006	0.891252	LotjaGi1g1v0490600	NA
Lj3g3v2890770	0.824911	0.644879	0.606535	LotjaGi3g1v0464000	Plant peroxidase
Lj1g3v3716750	0.665548	0.577481	0.161711	NA	Chalcone synthase
Lj5g3v0670610	1.46644	1.15318	0.92791	NA	NA
Lj2g3v1550410	0.678656	0.269189	0.193387	NA	NA
Lj0g3v0118819	0.582468	0.366342	0.117945	LotjaGi2g1v0137900	Tellurite resistance protein tehA-like protein
Lj1g3v4955490	0.581399	0.413238	0.429129	NA	NA
Lj4g3v1073560	0.952101	0.917733	0.888783	NA	NA
Lj2g3v2314870	0.825388	-0.199766	-0.800402	LotjaGi1g1v0116600	NA
Lj0g3v0318259	1.02605	0.63598	0.593139	LotjaGi1g1v0102200	NA
Lj0g3v0024119	1.26505	1.25481	1.05677	LotjaGi3g1v0400400	Auxin-induced protein X15
Lj0g3v0253319	0.731122	0.497367	0.584682	NA	NA
Lj1g3v0450220	1.64098	1.18999	0.234433	NA	NA
Lj3g3v0870610	1.05618	0.523568	0.707019	LotjaGi3g1v0124200	HLH
Lj0g3v0296059	0.961952	0.694935	0.553462	LotjaGi3g1v0156200	NA
Lj0g3v0009119	0.777782	0.783384	0.56307	LotjaGi3g1v0152500	WNK1
Lj2g3v1467920	0.705052	0.64147	0.496428	LotjaGi2g1v0330500	SYMRK
Lj0g3v0359569	0.908317	0.836916	0.344992	LotjaGi5g1v0251000	Glycoside hydrolase
Lj4g3v1614650	1.03507	0.788228	0.300902	LotjaGi4g1v0246100	NA
Lj6g3v1887800	0.745483	0.724274	0.548283	LotjaGi6g1v0300700	NA
Lj2g3v1015600	0.779192	0.593248	0.508067	LotjaGi2g1v0248900	potassium uptake protein
Lj0g3v0351589	0.882274	0.75099	0.443273	LotjaGi2g1v0094500	MATE EFFLUX FAMILY PROTEIN
Lj6g3v1887790	0.738362	0.71729	0.542965	LotjaGi6g1v0300700	Glutamine synthetase
Lj1g3v4820010	1.26751	0.989035	0.550598	LotjaGi1g1v0753500	UNC93-like protein C922.05c
Lj2g3v0777150	0.646568	0.727636	0.482171	LotjaGi2g1v0214500	Aldehyde/histidinol dehydrogenase
Lj3g3v1422900	0.780661	0.783539	0.553316	LotjaGi3g1v0152500	WNK1
Lj6g3v1953860	0.726422	0.703143	0.533953	LotjaGi6g1v0300700	NA
Lj6g3v1695010	0.692145	0.781987	0.577016	LotjaGi6g1v0279600	NA
Lj3g3v3336280	1.27542	0.904473	0.408897	LotjaGi3g1v0502300	EPIDIDYMAL MEMBRANE PROTEIN E9-RELATED
Lj0g3v0330889	1.03097	0.833318	0.442555	LotjaGi1g1v0457500	NA
Lj5g3v0465980	1.54006	1.64522	0.57963	LotjaGi5g1v0046400	Spermidine/spermine synthases family
Lj6g3v1695000	0.677004	0.811971	0.570103	LotjaGi6g1v0279600	RING FINGER
Lj0g3v0009109	0.735752	0.774038	0.534096	LotjaGi3g1v0152500	Protein kinase
Lj6g3v2030860	0.600525	0.709993	0.501655	LotjaGi6g1v0331800	Ubiquitin-conjugating enzyme
Lj6g3v1953940	0.898019	0.783886	0.541778	NA	NA
Lj2g3v1294240	0.885354	0.809425	0.415377	LotjaGi2g1v0306100	NA
Lj0g3v0009099	0.774584	0.796274	0.579237	LotjaGi3g1v0152500	NA
Lj1g3v0415650	0.938427	0.655173	0.53033	NA	NA
Lj3g3v2362140	0.661717	0.645886	0.448472	LotjaGi3g1v0390000	F-box-like
Lj6g3v0144920	0.656666	0.671978	0.53325	LotjaGi6g1v0015600	NA
Lj1g3v1650270	0.642441	0.581674	0.495035	LotjaGi1g1v0355600	Basic-leucine zipper domain
Lj2g3v0381780	0.616935	0.591733	0.548206	LotjaGi2g1v0141400	Plant regulator RWP-RK
Lj0g3v0320339	1.60656	1.00613	0.712105	LotjaGi1g1v0102300	NA
Lj5g3v0627080	0.634832	0.626294	0.54425	LotjaGi5g1v0077900	Serine-threonine/tyrosine-protein kinase
Lj0g3v0331139	1.26037	0.798808	0.5247	NA	GAG-POL-RELATED RETROTRANSPOSON
Lj6g3v1953930	0.700603	0.594359	0.541356	LotjaGi6g1v0300700	NA
Lj1g3v0672110	0.907662	0.788709	0.424224	LotjaGi1g1v0199600	Haem peroxidase
Lj6g3v2218680	0.745569	0.717217	0.539956	LotjaGi6g1v0354300	Sulphate
Lj0g3v0112459	0.746129	0.716915	0.539948	LotjaGi6g1v0354300	NA
Lj0g3v0266219	0.659918	0.705942	0.255225	LotjaGi3g1v0520500	NA
Lj0g3v0237649	1.78947	1.0625	0.351188	NA	NA
Lj6g3v1480320	1.78947	1.0625	0.351188	NA	NA
Lj2g3v1560840	0.994314	0.58885	0.512315	LotjaGi2g1v0349600	ATP-BINDING CASSETTE TRANSPORTER
Lj6g3v1708470	0.656033	0.606105	0.382813	LotjaGi6g1v0281900	Rossmann-like alpha/beta/alpha sandwich fold
Lj0g3v0099919	1.00029	0.811768	0.323653	LotjaGi5g1v0040200	Protein phosphatase 2C-like
Lj5g3v0525230	1.66637	1.41975	0.84713	NA	NA
Lj4g3v1218330	0.587594	0.728971	0.468225	LotjaGi4g1v0200100	Homeobox-leucine zipper protein
Lj1g3v3382450	0.944255	0.95715	0.574955	LotjaGi1g1v0565300	NA
Lj0g3v0237639	0.77725	0.638916	0.165	NA	Replication protein A 70 kDa DNA-binding subunit
Lj3g3v2908690	1.09828	0.756585	0.56713	LotjaGi3g1v0467300	NA
Lj6g3v1953950	0.764023	0.827765	0.439168	NA	NA
Lj0g3v0128499	0.773279	0.612148	0.387769	LotjaGi6g1v0190600	NA
Lj1g3v4918760	1.24555	1.07072	0.566931	LotjaGi1g1v0769400	Epoxide hydrolase
Lj0g3v0146019	1.5541	1.16149	0.734026	LotjaGi2g1v0274400	Protein kinase
Lj3g3v1983620	0.629907	0.650728	0.537019	LotjaGi3g1v0338600	Cytochrome P450
Lj5g3v0380040	1.17432	0.852269	0.427273	LotjaGi5g1v0040200	Protein phosphatase 2C-like
Lj1g3v2067530	0.734097	0.844037	0.415977	LotjaGi1g1v0404600	Carotenoid oxygenase
Lj0g3v0207589	1.27986	0.741202	0.60154	LotjaGi4g1v0354900	NA
Lj6g3v0144910	0.831723	0.635797	0.520072	NA	DNA internalization-related competence protein ComEC/Rec2
Lj0g3v0278839	0.679398	0.591446	0.476683	NA	NA
Lj0g3v0006169	0.854258	0.692216	0.289484	LotjaGi6g1v0146300	Cytochrome P450
Lj0g3v0114139	2.00983	1.54833	0.948653	NA	NA
Lj3g3v3500040	0.860147	0.587921	0.511947	LotjaGi3g1v0523500	Phospholipase C
Lj3g3v2719860	0.609116	0.608161	0.489049	LotjaGi3g1v0428700	NA
Lj5g3v1793480	0.614974	0.728709	0.512591	LotjaGi5g1v0269500	Zinc finger, C2H2
Lj0g3v0329599	1.91059	1.48954	0.532457	NA	NA
Lj3g3v0275840	0.624237	0.739961	0.494769	LotjaGi5g1v0269500	Zinc finger, C2H2
Lj0g3v0250569	3.77924	3.14965	2.65804	NA	GAG-POL-RELATED RETROTRANSPOSON
Lj0g3v0009139	0.760067	0.7466	0.516071	NA	NA
Lj6g3v1953980	0.697672	0.731639	0.432581	NA	NA
Lj0g3v0081209	2.83019	2.93749	1.41567	LotjaGi6g1v0116200	Acyl-CoA N-acyl
Lj2g3v2508990	2.02383	1.54161	0.991148	LotjaGi3g1v0488900	Serine-threonine protein kinase
Lj2g3v1985200	0.702838	0.618949	0.561531	LotjaGi2g1v0415900	Pyruvate kinase
Lj4g3v1152950	0.702838	0.618949	0.561531	LotjaGi2g1v0415900	Pyruvate kinase
Lj1g3v1486360	0.735728	0.696904	0.568361	LotjaGi1g1v0336600	TB2/DP1/HVA22-related protein
Lj1g3v2908520	0.836472	0.840795	0.245466	LotjaGi1g1v0493000	Prenylated rab acceptor PRA1
Lj0g3v0262279	0.716835	0.644321	0.175933	LotjaGi6g1v0099200	Response regulator
Lj6g3v0778670	0.901257	0.656929	0.195746	LotjaGi6g1v0145800	Cytochrome P450
Lj4g3v1152920	1.87496	1.21492	0.337744	LotjaGi2g1v0415700	Cytochrome P450
Lj6g3v1954150	1.78627	1.25563	1.00221	LotjaGi6g1v0313800	NA
Lj6g3v0778680	0.929122	0.666764	0.251435	LotjaGi6g1v0145800	Cytochrome P450
Lj6g3v1954140	2.1072	1.77655	1.07248	LotjaGi6g1v0313700	SERINE CARBOXYPEPTIDASE I (PLANTS)
Lj2g3v2089740	0.708883	0.751935	0.52107	LotjaGi2g1v0443200	GRAS family
Lj3g3v2404030	0.910697	0.658621	0.564842	NA	NA
Lj6g3v1953970	0.80681	0.750804	0.57896	NA	NA
Lj1g3v1358990	0.60524	0.685323	0.531291	LotjaGi1g1v0323300	NA
Lj0g3v0188939	0.812442	0.595501	0.552199	LotjaGi2g1v0201900	NA
Lj0g3v0261479	0.817146	0.595583	0.551143	LotjaGi2g1v0201900	COPPER TRANSPORT PROTEIN ATOX1-RELATED
Lj0g3v0341529	0.659821	0.728356	0.223273	LotjaGi3g1v0097100	NA
Lj1g3v0416300	1.08229	0.924966	0.642839	LotjaGi1g1v0184700	NA
Lj3g3v2096010	0.836713	0.604725	0.34297	NA	NA
Lj0g3v0050029	0.69762	0.660257	0.195814	LotjaGi6g1v0099200	Response regulator
Lj0g3v0131719	1.59024	1.29455	1.05705	NA	NA
Lj2g3v1966140	1.18799	1.06532	0.660677	LotjaGi2g1v0407900	NA
Lj2g3v1326400	1.08674	0.785026	0.303275	NA	NA
Lj0g3v0329589	1.78882	1.44495	0.385746	NA	NA
Lj0g3v0115499	0.66308	0.795216	0.567348	LotjaGi4g1v0137700	NA
Lj5g3v0962690	0.826319	0.828113	-0.0324679	LotjaGi5g1v0164300	Adenylate isopentenyl
Lj4g3v2834070	2.75094	2.22141	1.74619	NA	CRE-SRA-33 protein
Lj3g3v0948490	0.947312	0.756661	0.34717	LotjaGi3g1v0133000	NA
Lj1g3v4729110	0.73571	0.743287	0.44179	LotjaGi1g1v0735700	Lysine decarboxylase-like protein
Lj0g3v0186339	1.2491	1.15885	0.89435	NA	NA
Lj3g3v2466520	0.713977	0.865082	0.519738	NA	NA
Lj0g3v0278879	0.853627	0.686425	0.536923	LotjaGi6g1v0036600	Phytoene synthase
Lj5g3v0805300	0.743227	0.792937	0.479586	LotjaGi1g1v0735700	Lysine decarboxylase-like protein
Lj2g3v1199970	0.628373	0.752197	0.351686	LotjaGi2g1v0287900	Auxin and ethylene responsive GH3-like protein
Lj6g3v0777300	0.823726	0.701951	0.131751	LotjaGi6g1v0146300	Cytochrome P450
Lj0g3v0248389	0.915971	0.908763	0.470077	NA	NA
Lj1g3v0013270	0.72075	0.715224	0.526485	LotjaGi5g1v0060500	alpha/beta-Hydrolases
Lj2g3v1757060	2.41127	2.03814	0.94088	LotjaGi2g1v0389500	NA
Lj0g3v0199189	0.766457	0.670971	0.371211	NA	NA
Lj0g3v0199199	0.761614	0.666849	0.386561	LotjaGi2g1v0272000	NA
Lj0g3v0104499	0.894405	0.776912	0.463534	LotjaGi2g1v0330600	NA
Lj2g3v2509000	1.55345	1.59208	1.07086	LotjaGi1g1v0100000	Thioredoxin-like
Lj0g3v0128389	3.61912	3.22994	2.48426	LotjaGi3g1v0548500	Leucine rich repeat
Lj4g3v0523480	0.991487	1.06545	0.47382	LotjaGi4g1v0069100	SOMETHING ABOUT SILENCING PROTEIN 10
Lj1g3v2629780	0.762607	0.811132	0.432608	LotjaGi1g1v0473700	Extended synaptotagmin-2
Lj1g3v2629790	0.762465	0.815692	0.43852	LotjaGi1g1v0473700	Extended synaptotagmin-2
Lj0g3v0243649	0.984288	1.05826	0.466622	LotjaGi4g1v0069100	SOMETHING ABOUT SILENCING
Lj0g3v0206139	0.667762	0.717435	0.565842	LotjaGi3g1v0231200	Ankyrin repeat-containing domain
Lj2g3v1989180	0.607176	0.80854	0.463762	LotjaGi2g1v0420600	Kinase-like protein
Lj6g3v1953890	0.706336	0.677871	0.418736	NA	NA
Lj2g3v1349470	1.97953	1.80829	0.930236	LotjaGi2g1v0310600	NA
Lj1g3v4669310	1.01341	1.05374	0.5422	NA	DEAD-like helicase
Lj0g3v0007899	0.988759	0.83263	0.39814	LotjaGi5g1v0108000	NA
Lj1g3v2822780	0.910539	0.962071	0.615844	LotjaGi1g1v0484900	NA
Lj3g3v2665420	0.656261	0.62887	0.531364	LotjaGi3g1v0421400	Nbs-lrr resistance protein
Lj3g3v0381720	0.584099	0.725851	0.559321	LotjaGi3g1v0033700	NA
Lj3g3v0381710	0.583816	0.725851	0.559321	LotjaGi3g1v0033700	EF-hand-like domain
Lj5g3v1223650	0.813067	0.715493	0.584869	LotjaGi5g1v0196400	Heme-dependent peroxidases
Lj3g3v0290220	1.17577	1.37419	0.867146	LotjaGi3g1v0022100	Phosphofructokinase
Lj1g3v3580350	0.672181	0.68638	0.28168	NA	NA
Lj0g3v0329619	1.6247	1.29841	0.671763	LotjaGi1g1v0572800	RNI-like
Lj0g3v0138979	2.59529	2.23569	2.14463	LotjaGi2g1v0135400	Receptor kinase-like protein
Lj0g3v0329609	1.60831	1.27807	0.663171	LotjaGi1g1v0572800	Leucine-rich repeats
Lj0g3v0314119	0.913779	0.813123	-0.172405	LotjaGi5g1v0164300	Adenylate isopentenyl
Lj1g3v4765190	1.53463	1.55045	1.19638	NA	Wall-associated receptor kinase galacturonan-binding domain
Lj0g3v0331039	1.03388	1.0401	0.559868	LotjaGi2g1v0272000	Protein kinase
Lj3g3v3376220	0.726974	0.802395	0.398338	NA	NA
Lj0g3v0151629	1.05834	0.995345	0.757364	NA	NA
Lj6g3v1629650	5.15466	4.72278	3.19829	LotjaGi6g1v0268400	Germin-like protein 8-2
Lj0g3v0307199	0.893611	0.897077	0.588103	NA	NA
Lj2g3v1988950	2.29265	2.05054	0.490949	NA	NA
Lj1g3v0129200	1.0137	0.970841	0.307832	NA	NA
Lj3g3v1603860	0.627784	0.619353	0.257999	NA	NA
Lj0g3v0314129	0.826965	0.770953	-0.121257	LotjaGi5g1v0164300	Adenylate isopentenyl
Lj1g3v3716790	1.05021	0.907253	0.525856	NA	NA
Lj1g3v3716740	1.05438	0.901817	0.337614	NA	NA
Lj1g3v0129110	1.05021	0.907254	0.525857	NA	NA
Lj2g3v2125090	1.05021	0.907254	0.525857	NA	NA
Lj1g3v3716780	0.962196	0.823861	0.451422	NA	NA
Lj0g3v0180949	2.21124	2.02377	1.33936	NA	NA
Lj2g3v0077800	1.22822	1.18154	0.603296	NA	NA
Lj4g3v0153860	1.51213	1.92681	1.19948	LotjaGi4g1v0015300	NA
Lj0g3v0341169	1.21208	1.34262	0.797314	LotjaGi6g1v0077800	Lateral organ boundaries, LOB
Lj6g3v0484100	1.21208	1.34262	0.797314	LotjaGi6g1v0077800	Lateral organ boundaries, LOB
Lj4g3v1477230	0.599998	0.846784	0.57747	NA	Glutathione synthetase ATP-binding
Lj5g3v1853000	1.10254	1.17454	0.4262	LotjaGi5g1v0277300	NA
Lj0g3v0262379	0.924958	1.04273	0.436339	LotjaGi3g1v0168900	NA
Lj0g3v0290869	3.43363	4.17085	3.04746	LotjaGi1g1v0158300	NA
Lj1g3v5020840	0.653941	0.695333	0.521024	NA	NA
Lj0g3v0341449	0.705138	0.793491	0.408143	LotjaGi4g1v0159000	NA
Lj2g3v1468130	0.864217	0.78218	0.121514	LotjaGi2g1v0331300	NA
Lj6g3v0072070	0.665765	0.688608	0.476043	LotjaGi5g1v0282800	NA
Lj4g3v0153870	0.865964	0.937285	-0.0707307	LotjaGi4g1v0015400	NA
Lj0g3v0106899	0.884262	1.06785	0.442614	LotjaGi3g1v0013500	Gibberellin 3-beta-hydroxylase
Lj4g3v0189910	0.7101	0.813427	0.479677	LotjaGi4g1v0019100	NA
Lj0g3v0001689	1.88401	1.93052	1.65657	NA	NA
Lj0g3v0194299	0.8198	0.78878	0.403268	LotjaGi1g1v0084600	NA
Lj5g3v1988810	0.686218	0.836397	0.472452	NA	NA
Lj0g3v0107979	0.985132	1.21932	0.839529	LotjaGi4g1v0079600	DUF4228
Lj1g3v2822800	0.799996	0.783998	0.595249	NA	NA
Lj3g3v3200880	0.963986	0.990529	0.642186	NA	NA
Lj1g3v4528360	0.659232	0.937966	0.462189	LotjaGi1g1v0703700	NA
Lj0g3v0133819	0.65794	1.10782	0.578331	LotjaGi6g1v0351700	NA
Lj1g3v2910580	0.81514	0.852471	0.662268	LotjaGi1g1v0493800	Protein kinase
Lj1g3v2910590	0.81514	0.852471	0.662268	LotjaGi1g1v0493800	Leucine rich repeat
Lj2g3v0435450	4.15258	3.61064	3.1609	LotjaGi5g1v0304400	Multidrug and toxin ex
Lj5g3v2027290	4.15258	3.61064	3.1609	LotjaGi5g1v0304400	Multidrug and toxin ex
Lj3g3v0786210	4.11373	3.30524	3.04261	LotjaGi3g1v0106300	Glycoside hydrolase
Lj1g3v3385830	4.04801	3.30774	2.757	LotjaGi1g1v0568000	MLO-like protein
Lj6g3v1537040	6.47394	5.99358	5.78457	LotjaGi2g1v0126500	NA
Lj0g3v0088019	7.01726	6.34468	5.85556	LotjaGi4g1v0172700	|G7LII2|G7LII2_MEDTR Lectin receptor-like kinase Tg-20
Lj0g3v0011459	5.21478	5.12592	4.86147	LotjaGi1g1v0145800	Aquaporin
Lj1g3v3318570	5.21478	5.12592	4.86147	LotjaGi1g1v0145800	Aquaporin
Lj5g3v0878400	5.21478	5.12592	4.86147	LotjaGi1g1v0145800	Aquaporin
Lj0g3v0358659	5.60214	5.57585	5.55727	LotjaGi1g1v0001500	Nodule inception protein
Lj2g3v3373100	5.60214	5.57585	5.55727	LotjaGi1g1v0001500	Nodule inception protein
Lj0g3v0358669	5.5969	5.56416	5.55436	LotjaGi1g1v0001500	NA
Lj2g3v3373110	5.5969	5.56416	5.55436	LotjaGi1g1v0001500	NA
Lj4g3v2046100	6.09566	5.89336	5.71626	LotjaGi4g1v0296200	Receptor-like kinase
Lj0g3v0201269	3.1617	3.32386	2.92895	LotjaGi5g1v0017600	NA
Lj3g3v2576200	3.9978	3.40442	3.30175	LotjaGi3g1v0411100	NA
Lj4g3v3016310	4.22511	4.67999	4.37571	LotjaGi4g1v0441000	Myb domain
Lj0g3v0341679	3.8873	3.51009	3.40926	LotjaGi3g1v0314500	NA
Lj5g3v1174330	6.62258	5.67861	5.51029	NA	NA
Lj3g3v2995720	5.60945	4.82183	4.58965	LotjaGi3g1v0478800	Peptidase S8
Lj0g3v0168319	2.31819	1.74852	1.49695	LotjaGi1g1v0302100	UNC93-like protein C922.05c
Lj2g3v1014150	7.90522	8.10876	7.88301	LotjaGi2g1v0247000	Uncharacterised protein family UPF0497
Lj5g3v0525250	3.43815	3.47764	2.93829	LotjaGi5g1v0054800	Chitinase II
Lj6g3v1038780	7.13302	6.4989	5.8433	LotjaGi6g1v0195700	Lipoxygenase
Lj0g3v0306419	10.5952	11.1854	11.3839	LotjaGi6g1v0096900	Pectin lyase
Lj3g3v3751920	7.57428	7.85281	8.31094	LotjaGi3g1v0554000	Pectinesterase inhibitor
Lj3g3v3751930	7.58015	7.85513	8.31429	LotjaGi3g1v0554000	Plant invertase/pectin methylesterase inhibi
Lj1g3v4918680	1.26684	1.01264	0.731513	LotjaGi1g1v0769400	EPOXIDE HYDROLASE-RELATED
Lj1g3v4918670	1.23758	0.971792	0.700265	LotjaGi1g1v0769400	EPOXHYDRLASE
Lj0g3v0104079	1.67457	1.78171	1.38755	LotjaGi1g1v0234500	VITAMIN C PERMEASE FAMILY MEMBER
Lj5g3v0404890	1.88558	2.25902	2.45662	LotjaGi5g1v0043700	NA
Lj0g3v0104089	1.66433	1.7789	1.37617	LotjaGi1g1v0234500	VITAMIN C PERMEASE FAMILY MEMBER
Lj0g3v0043799	2.40066	2.00832	1.82208	LotjaGi1g1v0605800	NA
Lj0g3v0099189	5.53025	5.55944	5.64125	LotjaGi1g1v0424000	Proton-dependent oligopeptide
Lj0g3v0252959	1.94335	1.9831	1.56188	LotjaGi3g1v0281900	p-hydroxybenzoic acid efflux pump subunit aaeB
Lj1g3v1785980	1.61907	2.00899	2.04282	LotjaGi1g1v0366800	Zinc/iron permease
Lj6g3v2258840	2.57464	2.48857	2.04708	LotjaGi2g1v0405900	Indole-3-acetic acid-amido synthetase GH3.3
Lj1g3v1785990	1.64577	2.01798	2.05544	LotjaGi1g1v0366800	Cytochrome c oxidase subunit
Lj6g3v1914550	1.92701	1.68346	1.33465	LotjaGi6g1v0258100	Nicotianamine synthase 1 (Fragment)
Lj0g3v0049599	3.40832	2.99134	2.66058	LotjaGi2g1v0091200	NA
Lj0g3v0342909	11.1757	11.871	12.3197	LotjaGi1g1v0539200	plant integral membrane protein
Lj5g3v0525240	3.27412	3.30026	2.76581	NA	NA
Lj0g3v0283259	1.81696	2.1543	2.37201	LotjaGi5g1v0043700	NA
Lj0g3v0200899	1.9539	2.07366	2.48176	LotjaGi6g1v0028300	NA
Lj2g3v1925800	2.48426	2.40935	1.97487	LotjaGi2g1v0405900	Indole-3-acetic acid-amido synthetase GH3.3
Lj6g3v1415840	4.21862	3.14871	2.83982	LotjaGi6g1v0245800	Cytochrome P450,
Lj2g3v1925790	2.48746	2.41203	1.98041	LotjaGi2g1v0405900	Indole-3-acetic acid-amido synthetase GH3.3
Lj2g3v1002750	4.90122	5.41837	5.81645	LotjaGi2g1v0245900	Carbonic anhydrase
Lj0g3v0290889	3.08402	2.93881	2.95	LotjaGi1g1v0158400	EGF-type aspartate/asparagine hydroxyl
Lj0g3v0171779	3.3278	2.89847	2.58808	LotjaGi6g1v0245700	Cytochrome P450
Lj0g3v0320499	5.55545	5.03408	5.25239	LotjaGi2g1v0002600	NA
Lj5g3v0526340	3.26554	3.2835	2.80276	LotjaGi5g1v0055200	Glycoside hydrolase
Lj5g3v0841080	8.91328	9.61958	9.74873	LotjaGi5g1v0106700	CCAAT-binding
Lj2g3v1828460	1.69525	1.82189	2.08146	LotjaGi2g1v0395600	Homeodomain-like
Lj2g3v0694690	1.12841	1.23013	1.03616	LotjaGi2g1v0202400	RING FINGER CONTAINING PROTEIN
Lj1g3v4483420	1.96105	2.25353	1.43687	LotjaGi1g1v0711000	Lateral organ boundaries, LOB
Lj0g3v0231549	1.43743	1.54874	1.72302	LotjaGi3g1v0189100	Cytochrome P450
Lj1g3v4564810	1.32484	1.11756	0.935344	LotjaGi1g1v0698100	NA
Lj1g3v3704730	1.32466	1.11756	0.935344	LotjaGi1g1v0698100	NA
Lj2g3v1536270	1.7982	1.5976	1.52619	LotjaGi2g1v0340700	Acetyl-CoA synthetas
Lj0g3v0360469	3.07107	2.81901	2.62517	LotjaGi4g1v0309900	FAD-binding, type 2
Lj0g3v0360459	3.07986	2.83022	2.62485	LotjaGi4g1v0309900	FAD-binding, type 2
Lj5g3v0525260	3.22177	3.22231	2.7236	LotjaGi5g1v0054800	Glycoside hydrolase
Lj3g3v2835370	2.21715	2.27137	2.19051	LotjaGi6g1v0064000	Zinc finger, C2H2
Lj1g3v1853300	1.57387	1.37306	0.872567	LotjaGi1g1v0380300	KNOX2
Lj1g3v2926300	0.98279	0.85683	0.694406	LotjaGi6g1v0068500	NA
Lj6g3v1421130	3.03672	2.54336	2.29793	LotjaGi6g1v0246600	NA
Lj5g3v1176810	1.29679	1.28249	1.13321	LotjaGi5g1v0188800	Pho1-like protein
Lj4g3v0744860	1.3255	1.16192	1.07277	LotjaGi4g1v0093900	NA
Lj2g3v2351580	4.92533	4.81897	5.21403	LotjaGi1g1v0114600	NA
Lj0g3v0245069	3.57924	3.66566	3.16494	LotjaGi3g1v0247700	NA
Lj4g3v0451220	0.965588	1.12614	1.24733	LotjaGi4g1v0056200	NA
Lj3g3v3086100	1.1498	1.02886	0.752421	LotjaGi2g1v0361300	Beta-galactosidase
Lj3g3v2579340	1.4094	1.27636	0.790011	LotjaGi3g1v0414350	Nodulation signaling pathway 1-like protein
Lj0g3v0209939	9.3496	8.44427	7.5556	LotjaGi6g1v0195200	Lipoxygenase
Lj0g3v0267769	1.21214	1.11521	0.785268	LotjaGi2g1v0361300	Beta-galactosidase
Lj2g3v1648070	1.32102	1.41403	1.5332	LotjaGi2g1v0377700	NA
Lj2g3v1659660	1.31516	1.40875	1.52735	LotjaGi2g1v0377700	NA
Lj0g3v0346019	10.5371	10.844	10.5196	LotjaGi2g1v0018600	O-METHYLTRANSFERASE
Lj3g3v1011060	4.26345	3.79086	3.78506	LotjaGi3g1v0150300	NA
Lj2g3v1415410	2.70255	2.77121	3.10088	LotjaGi2g1v0324000	LysM type receptor kinase
Lj0g3v0315629	5.36122	4.60466	3.9366	LotjaGi4g1v0162100	Protein of unknown function DUF4228
Lj0g3v0095039	5.02986	4.64477	4.591	LotjaGi2g1v0152900	Serine-threonine/tyrosine-protein kinase
Lj1g3v1526020	1.15071	1.23551	1.18417	LotjaGi1g1v0341100	Zinc finger, RING-type
Lj1g3v0415090	6.17525	6.7186	7.26423	LotjaGi1g1v0182900	Protein kinase-like (PK-like)
Lj4g3v2253780	5.20254	5.44922	5.38816	LotjaGi4g1v0333400	SERPIN
Lj0g3v0266379	4.91229	4.99787	5.16919	LotjaGi5g1v0144700	Cytochrome P450
Lj4g3v3114840	2.87542	2.72276	2.66644	LotjaGi4g1v0464300	Tubulin/FtsZ
Lj1g3v0183010	1.86178	1.21438	0.597313	LotjaGi1g1v0137600	NA
Lj2g3v0126250	8.92015	9.88413	10.3158	LotjaGi3g1v0312800	EamA,Drug/metabolite
Lj1g3v2264920	1.72007	1.69018	1.83951	LotjaGi1g1v0432900	Serine-threonine/tyrosine-protein kinase
Lj6g3v1826370	1.82476	1.43403	1.30509	LotjaGi6g1v0292500	MITOGEN-ACTIVATED PROTEIN KINASE KINASE
Lj0g3v0345599	1.37859	1.48254	1.16471	LotjaGi1g1v0430600	SUBTILISIN-LIKE PROTEASE (PLANT)
Lj1g3v4918750	1.14672	0.959813	0.703282	LotjaGi1g1v0769600	EPOXHYDRLASE
Lj0g3v0266399	0.96785	1.11684	1.28542	LotjaGi4g1v0056200	NA
Lj0g3v0010159	5.59321	7.12113	7.84283	LotjaGi4g1v0288300	Putative CAM kinase
Lj2g3v0661580	2.6809	2.51003	2.39535	LotjaGi4g1v0464300	Tubulin/FtsZ
Lj0g3v0266419	1.10489	1.23367	1.30375	NA	NA
Lj0g3v0155859	1.89227	2.22208	2.67438	LotjaGi1g1v0668400	NA
Lj3g3v3451360	1.89227	2.22208	2.67438	LotjaGi1g1v0668400	NA
Lj1g3v2611530	1.50652	1.4035	1.43415	LotjaGi1g1v0468400	NA
Lj3g3v1855560	8.98104	9.98545	10.4403	LotjaGi3g1v0312800	Multidrug resistance efflux
Lj5g3v0526350	3.17707	3.31467	2.74	NA	NA
Lj4g3v0744870	1.3729	1.1935	1.10487	LotjaGi4g1v0093900	NA
Lj5g3v1174410	2.7059	1.96088	1.33618	NA	Protease inhibitor
Lj6g3v0959410	2.82493	3.66341	4.63288	LotjaGi6g1v0180800	putative zinc finger domain
Lj1g3v4918730	1.1891	1.35754	1.59238	LotjaGi1g1v0712200	Cytochrome P450
Lj3g3v2188150	2.2152	2.15007	2.38942	LotjaGi3g1v0356600	NA
Lj4g3v3061490	1.76895	1.49487	1.30759	LotjaGi4g1v0447900	Zinc finger, RING/FYVE/PHD-type
Lj6g3v0326360	3.55249	3.54298	2.93385	LotjaGi6g1v0043000	NA
Lj2g3v2794480	2.30249	2.21811	1.95772	NA	NA
Lj1g3v3768310	4.47634	4.1616	4.5515	LotjaGi1g1v0619400	NA
Lj4g3v2172790	3.95652	3.61361	3.39745	LotjaGi4g1v0311300	Plant peroxidase
Lj2g3v1659650	1.55387	1.60496	1.73378	NA	NA
Lj2g3v1648060	1.55388	1.60293	1.73378	NA	NA
Lj2g3v2794440	2.72659	2.6189	2.32691	LotjaGi1g1v0075000	E3 ubiquitin ligase
Lj5g3v0122120	2.43502	1.80352	1.71333	LotjaGi5g1v0189500	Protein phosphatase 2C
Lj1g3v2994540	4.98933	4.92856	3.94906	LotjaGi1g1v0508300	NA
Lj0g3v0020349	1.45196	1.01596	0.815643	LotjaGi1g1v0109100	NA
Lj6g3v0326350	3.53606	3.4903	2.88956	LotjaGi6g1v0043000	NA
Lj0g3v0131419	2.31614	2.23664	2.62935	LotjaGi6g1v0194600	Cytokinin-O-glucosyl
Lj2g3v2411360	1.44311	1.00231	0.817555	LotjaGi1g1v0109100	Peroxidase
Lj1g3v0416320	3.79472	3.98069	4.04726	LotjaGi1g1v0184800	Formin homology 2 domain (FH2 domain)
Lj2g3v2039960	1.04933	1.23898	1.41506	LotjaGi2g1v0435500	POX
Lj0g3v0161929	0.881402	0.86977	1.02556	LotjaGi5g1v0249200	Primary amine oxidase
Lj2g3v0636810	3.0015	2.97743	3.06457	LotjaGi2g1v0191100	Protein kinase
Lj2g3v3149350	1.70936	1.32528	1.23851	LotjaGi1g1v0033800	Cytochrome P450
Lj1g3v3704740	1.31916	1.08082	0.938751	LotjaGi1g1v0698100	NA
Lj1g3v4564820	1.31916	1.08082	0.938751	LotjaGi1g1v0698100	NA
Lj0g3v0000559	7.99562	8.79043	8.02114	LotjaGi3g1v0246500	NA
Lj0g3v0268639	0.829154	0.807083	0.787937	LotjaGi4g1v0282700	KNOX2
Lj0g3v0124299	3.65184	3.74779	4.0303	NA	ATPase
Lj2g3v2352620	4.99078	4.81438	5.32822	LotjaGi1g1v0114600	UDP-Glycosyl
Lj4g3v2666330	0.935122	0.924761	0.850011	LotjaGi4g1v0386600	Cytochrome P450
Lj3g3v0615870	1.64696	1.94066	2.10961	LotjaGi3g1v0072300	NA
Lj2g3v1647900	4.04467	3.4097	3.42289	LotjaGi2g1v0377400	NA
Lj1g3v3704750	1.2543	1.15205	0.971279	NA	NA
Lj1g3v4564830	1.2543	1.15205	0.971279	NA	NA
Lj0g3v0124309	3.63955	3.72079	3.99786	NA	NA
Lj2g3v1659570	4.039	3.4097	3.4229	LotjaGi2g1v0377400	NA
Lj3g3v2739670	1.01388	0.872087	0.646381	LotjaGi3g1v0435800	NA
Lj0g3v0306689	1.70547	1.64668	1.60504	LotjaGi1g1v0244400	Protein phosphatase 2C-like
Lj1g3v4918700	1.17582	1.25039	1.18764	LotjaGi1g1v0769500	alpha/beta-Hydrolases
Lj5g3v0659450	1.10139	1.11892	1.31231	LotjaGi5g1v0081000	Cysteine-type peptidase
Lj1g3v4918690	1.17275	1.24847	1.179	LotjaGi1g1v0769500	alpha/beta-Hydrolases
Lj6g3v0353780	1.78832	2.05601	2.44289	LotjaGi6g1v0049700	Protein kinase
Lj0g3v0118899	2.42379	2.39058	2.85222	LotjaGi6g1v0194600	Cytokinin-O-glucosyl
Lj1g3v2418700	0.935401	0.870077	0.752946	LotjaGi1g1v0450300	D-alanine--D-alanine ligase
Lj0g3v0056779	0.93464	0.860631	0.769849	LotjaGi1g1v0450300	D-alanine--D-alanine ligase
Lj4g3v2365210	8.04179	8.63292	8.84568	LotjaGi4g1v0343900	NA
Lj0g3v0364239	0.959542	0.894107	0.735855	LotjaGi6g1v0068500	NA
Lj4g3v2871740	1.30858	1.47462	1.62683	LotjaGi4g1v0422700	Transaldolase
Lj5g3v1176950	2.45308	1.84954	1.7893	LotjaGi5g1v0189500	Protein phosphatase 2C
Lj0g3v0101839	4.08673	3.52308	3.50421	LotjaGi2g1v0377400	NA
Lj0g3v0357719	3.13151	4.00228	4.9513	LotjaGi6g1v0180800	Protein of unknown function DUF702
Lj0g3v0064609	2.50543	2.77159	2.98865	LotjaGi2g1v0235100	Oxidosqualene cyclase
Lj6g3v1078050	0.888415	0.737159	0.739906	LotjaGi6g1v0219500	Cytochrome P450
Lj4g3v2140240	8.04357	7.0268	7.15658	NA	NA
Lj0g3v0149759	3.31038	2.34434	1.92686	LotjaGi6g1v0255300	Glycosyl-phosphatidyl inos
Lj1g3v3704760	1.38205	1.16175	0.987502	LotjaGi1g1v0698100	NA
Lj1g3v4564840	1.38205	1.16175	0.987502	LotjaGi1g1v0698100	NA
Lj2g3v0661570	2.73721	2.55875	2.50641	LotjaGi4g1v0464300	Tubulin/FtsZ
Lj0g3v0094539	4.23054	4.49647	4.75764	NA	ATPase
Lj1g3v4998440	1.5021	0.837208	0.599731	LotjaGi1g1v0783700	NA
Lj1g3v3848510	1.5021	0.833771	0.599734	LotjaGi1g1v0783700	NA
Lj1g3v3310060	1.17569	0.901992	1.00513	NA	NA
Lj1g3v5010640	1.53817	1.10382	0.748344	LotjaGi1g1v0785300	NA
Lj5g3v1174420	2.43152	1.71348	1.15858	LotjaGi5g1v0187100	GAMMA TUBULIN COMPLEX PROTEIN
Lj0g3v0163199	2.82588	2.8533	3.32208	LotjaGi3g1v0379800	NAD(P)-binding
Lj3g3v2453390	0.946731	1.16831	1.35461	LotjaGi1g1v0793800	Auxin response factor
Lj3g3v1113330	0.936953	0.955361	0.871834	LotjaGi3g1v0168700	NA
Lj0g3v0064539	3.82697	3.25289	3.57433	LotjaGi5g1v0195000	FAD-binding, type 2
Lj2g3v3222870	2.03058	2.03178	1.25969	LotjaGi1g1v0023500	S-adenosyl-L-methionine-dependent methyl
Lj0g3v0280269	3.19111	3.20521	2.85697	NA	NA
Lj1g3v3631760	6.74433	6.35274	6.8364	LotjaGi1g1v0606600	Pollen allergen/expansin
Lj5g3v0642670	6.74433	6.35274	6.8364	LotjaGi1g1v0606600	Expansin/pollen allergen
Lj1g3v3704720	1.39128	1.10387	1.05798	LotjaGi1g1v0698100	NA
Lj1g3v4564800	1.39128	1.10387	1.05798	LotjaGi1g1v0698100	NA
Lj5g3v1697440	0.852331	0.786372	0.830474	LotjaGi5g1v0256800	U-box domain-containing protein
Lj5g3v1697430	0.858049	0.791235	0.835592	LotjaGi5g1v0256800	NA
Lj3g3v1663540	3.56526	3.6749	3.22272	LotjaGi3g1v0247700	HLH
Lj4g3v3114850	1.29714	1.18225	1.08479	LotjaGi4g1v0464200	Mitochondrial carrier protein
Lj2g3v2183350	4.68172	5.1737	5.37194	LotjaGi1g1v0128100	NA
Lj3g3v2909700	1.04299	0.982382	0.836533	LotjaGi3g1v0467400	Aquaporin-like
Lj2g3v1536360	1.61372	2.08992	2.23178	LotjaGi2g1v0341200	Homeodomain-like
Lj2g3v2352610	5.01772	4.75017	5.32751	LotjaGi1g1v0114600	UDP-Glycosyl
Lj0g3v0302099	2.80083	2.63667	2.89627	LotjaGi6g1v0145500	Cytochrome P450
Lj3g3v2466510	0.895029	1.19128	0.774852	LotjaGi3g1v0397000	DNA-binding
Lj6g3v0779760	2.80236	2.63667	2.89627	LotjaGi6g1v0145500	Cytochrome P450
Lj0g3v0234189	2.38944	2.12945	1.82468	NA	Phytosulfokine
Lj0g3v0202379	3.6165	3.32835	3.73097	LotjaGi1g1v0667400	Helix-loop-helix domain
Lj6g3v1984370	2.42179	2.50684	2.80349	LotjaGi6g1v0320000	AP2/ERF domain
Lj2g3v1989170	3.25811	3.04832	3.27623	LotjaGi2g1v0420500	NA
Lj0g3v0266409	1.0505	1.16064	1.28227	NA	NA
Lj4g3v2227920	0.902883	1.05998	1.20579	LotjaGi4g1v0314400	NA
Lj2g3v2002640	1.43113	1.2249	1.02804	LotjaGi2g1v0427400	NA
Lj5g3v1793520	4.36282	5.50843	5.88018	LotjaGi5g1v0269700	Extensin
Lj2g3v1836090	2.52151	2.19894	2.01245	LotjaGi2g1v0399000	Peroxidase
Lj2g3v2351570	4.80983	4.53255	4.98106	LotjaGi1g1v0114600	UDP-Glycosyl
Lj4g3v2227930	0.947625	1.08649	1.2501	LotjaGi4g1v0314400	NA
Lj2g3v0855300	1.05415	0.943079	0.590609	LotjaGi2g1v0223900	RNA polymerase
Lj2g3v3149370	0.91722	0.738042	0.67861	LotjaGi1g1v0033800	Cytochrome P450
Lj0g3v0008099	2.82148	3.23285	2.68212	LotjaGi2g1v0061800	CATIONIC AMINO ACID TRANSPORTER
Lj1g3v2001820	2.82148	3.23285	2.68212	LotjaGi2g1v0061800	CATIONIC AMINO ACID TRANSPORTER
Lj1g3v3704810	1.48604	1.19939	1.11052	LotjaGi1g1v0698100	NA
Lj1g3v4564890	1.48604	1.19939	1.11052	LotjaGi1g1v0698100	NA
Lj3g3v2578300	1.39721	1.40916	0.967134	LotjaGi3g1v0414350	Nodulation signaling pathway 1-like protein
Lj0g3v0158689	1.84396	1.96436	2.23554	LotjaGi1g1v0264500	NA
Lj2g3v1549800	0.874765	0.812561	0.861717	LotjaGi2g1v0344400	NA
Lj0g3v0282979	2.34638	2.2061	2.35831	LotjaGi1g1v0121600	UDP-Glycosyl
Lj3g3v0720000	7.37355	8.00402	8.08741	LotjaGi3g1v0086300	Scorpion toxin-like
Lj0g3v0275539	3.00428	2.87243	2.50106	LotjaGi3g1v0297800	Zinc finger, MYND-type
Lj6g3v1914570	3.20671	3.79608	3.92354	LotjaGi6g1v0258000	DELLA protein GAI
Lj4g3v1600410	1.25074	1.3696	1.73721	LotjaGi4g1v0244600	Zinc finger, CHY-type
Lj4g3v1037460	3.08093	2.93254	3.33517	LotjaGi4g1v0127300	NA
Lj0g3v0286449	2.70789	2.24833	2.41065	LotjaGi3g1v0373800	Protein kinase
Lj1g3v2215380	1.32843	1.42734	1.11173	LotjaGi1g1v0430600	subtilisin/kexin/sedolisin
Lj3g3v2769460	3.86999	3.67077	3.24398	NA	Protein of unknown function DUF566
Lj0g3v0145339	1.79181	2.09264	2.48913	LotjaGi1g1v0417200	Protein kinase
Lj6g3v0551660	1.36018	1.28075	1.35286	LotjaGi6g1v0092100	Protein kinase-like (PK-like)
Lj1g3v3704780	1.27535	1.06071	0.8343	NA	NA
Lj1g3v4564860	1.27535	1.06071	0.8343	NA	NA
Lj4g3v1983610	6.3271	7.88506	8.63313	LotjaGi4g1v0288300	NA
Lj6g3v0779770	2.85191	2.78942	2.91336	LotjaGi6g1v0145500	Cytochrome P450
Lj0g3v0210229	1.21502	1.34056	1.32279	LotjaGi1g1v0341100	NA
Lj0g3v0068199	1.79537	2.10409	2.10369	LotjaGi1g1v0427900	Cytokinin riboside 5'-monophosphate phosphoribohydrolase LOG
Lj4g3v1785880	1.14473	1.43183	1.78429	NA	NA
Lj3g3v0527240	5.66117	4.73208	4.37615	LotjaGi3g1v0066100	ATPase
Lj6g3v1415830	3.53152	2.22641	2.43031	NA	NA
Lj2g3v1728900	3.35436	4.24049	5.00221	LotjaGi2g1v0386300	Short internode related sequence
Lj0g3v0262399	0.889524	0.927502	0.826788	LotjaGi3g1v0168700	NA
Lj6g3v0353790	1.31394	1.52395	1.88487	LotjaGi6g1v0049800	NA
Lj0g3v0011739	1.75946	1.73426	1.46985	LotjaGi6g1v0070100	NA
Lj0g3v0100099	1.75946	1.73426	1.46985	LotjaGi6g1v0070100	NA
Lj0g3v0155799	1.24266	1.48803	1.80274	LotjaGi1g1v0668200	2-oxoglutarate-dependent dioxygenase (Fragment)
Lj2g3v2598860	1.40465	1.98588	2.20681	LotjaGi1g1v0089200	Expansin
Lj5g3v2099560	3.5259	2.47244	1.89427	LotjaGi5g1v0322700	NA
Lj1g3v5035080	0.885138	1.1004	1.35101	LotjaGi1g1v0793800	DNA-binding
Lj0g3v0202359	3.53086	3.24829	3.64816	LotjaGi1g1v0667300	ACHAETE-SCUTE COMPLEX PROTEIN T5 (ACHAETE)
Lj3g3v3200830	0.774675	0.788072	0.889421	LotjaGi2g1v0373300	Protein phosphatase 2C-like
Lj4g3v3003870	1.10929	1.00148	0.72088	NA	NA
Lj2g3v2726510	0.956229	1.10248	1.10369	LotjaGi1g1v0079200	Auxin influx protein
Lj0g3v0065189	2.01158	1.89797	1.48722	LotjaGi6g1v0070100	Acid phosphatase (Class B)
Lj3g3v2247030	1.5452	1.10032	0.846575	NA	NA
Lj0g3v0336889	2.8654	3.07234	3.23179	LotjaGi1g1v0453100	Plant peroxidase
Lj0g3v0013429	1.35624	1.99473	2.22585	LotjaGi1g1v0089200	Expansin
Lj0g3v0185849	4.97978	5.25177	4.30356	LotjaGi1g1v0508300	S-adenosyl-L-methionine-dependent methyl
Lj1g3v1502550	1.2481	1.19018	1.17536	LotjaGi1g1v0338200	NA
Lj1g3v1502560	1.24713	1.19019	1.17415	LotjaGi1g1v0338200	Nodulin-like
Lj1g3v3704690	1.18625	1.0291	0.812146	NA	NA
Lj1g3v4564770	1.18625	1.0291	0.812146	NA	NA
Lj0g3v0219429	4.99541	4.75506	5.28184	LotjaGi5g1v0144700	Cytochrome P450
Lj0g3v0308259	1.02629	0.899196	0.845665	LotjaGi5g1v0151000	FAD/NAD(P)-binding
Lj5g3v2013880	1.42817	1.0615	0.972844	LotjaGi5g1v0301700	Myb domain
Lj3g3v3639190	1.51278	1.6978	1.7974	LotjaGi3g1v0540000	NA
Lj1g3v1486330	2.6197	3.60807	3.20664	NA	NA
Lj0g3v0154359	1.57819	0.997905	0.755637	LotjaGi6g1v0298900	Adenylate isopentenyl
Lj6g3v1371840	0.755415	0.704623	0.660858	LotjaGi6g1v0241300	ATPase
Lj5g3v1129680	0.792727	0.977646	0.892653	NA	RNA-directed DNA polymerase
Lj5g3v2029760	1.51296	1.51982	1.52027	LotjaGi5g1v0307000	omatic embryogenesis receptor kinase
Lj4g3v1327480	1.13951	0.720179	0.729953	LotjaGi4g1v0217200	Peptidase S8
Lj0g3v0171159	4.43974	5.68134	6.20443	LotjaGi5g1v0269700	Root nodule extensin (Fragment)
Lj3g3v0200840	1.13884	0.720179	0.729953	LotjaGi4g1v0217200	Peptidase S8
Lj1g3v4467780	1.16616	1.19271	0.865243	NA	Lysine/cadaverine
Lj1g3v2977070	0.621235	0.892874	0.818902	NA	NA
Lj4g3v0484020	0.621235	0.892874	0.818902	NA	NA
Lj0g3v0132199	3.43984	3.2654	4.36379	LotjaGi6g1v0104200	2OG-FE(II) OXYGENASE FAMILY PROTEIN
Lj0g3v0291429	1.15572	1.05735	1.20302	LotjaGi6g1v0273300	NA
Lj4g3v0435310	1.03022	1.06307	1.14978	LotjaGi4g1v0047700	NA
Lj0g3v0110479	0.907506	0.952768	1.22287	LotjaGi1g1v0122000	UDP-Glycosyl
Lj3g3v0948840	1.74425	1.7359	1.61181	LotjaGi3g1v0133100	Medicago
Lj0g3v0357689	1.14174	1.20207	1.36084	LotjaGi1g1v0712200	Cytochrome P450
Lj1g3v4863110	1.48671	1.47874	1.17823	NA	NA
Lj1g3v3329610	1.5692	1.0539	0.616028	LotjaGi1g1v0554300	NA
Lj0g3v0324949	0.924123	0.823379	1.06502	LotjaGi2g1v0303800	NA
Lj0g3v0179369	2.23019	1.50423	1.4066	NA	NA
Lj3g3v0488360	1.73461	1.72981	1.61535	LotjaGi3g1v0133100	Medicago
Lj0g3v0341109	1.87652	1.81474	1.83111	LotjaGi1g1v0382400	adenine phosphoribosyl
Lj0g3v0228019	1.48241	1.36067	1.06736	LotjaGi5g1v0168500	NA
Lj2g3v2437090	2.71685	2.78608	1.91918	LotjaGi1g1v0106400	NA
Lj5g3v2063140	1.10456	1.2637	1.34457	LotjaGi5g1v0319400	NA
Lj0g3v0115049	1.09431	0.85803	0.815001	LotjaGi4g1v0176500	Formin-like protein
Lj1g3v4694380	0.952392	0.694557	0.751559	LotjaGi1g1v0680800	NA
Lj2g3v1068730	1.57631	1.17727	1.35306	LotjaGi2g1v0262000	Ethylene-responsive
Lj0g3v0202329	3.3224	2.29353	3.53349	LotjaGi1g1v0667200	NA
Lj2g3v1105340	3.02858	2.73835	3.199	LotjaGi2g1v0270200	Oxoglutarate/iron-dependent dioxygenase
Lj0g3v0256799	0.890089	1.05355	1.23431	NA	NA
Lj2g3v0663780	1.80826	1.40125	1.05408	LotjaGi2g1v0196700	Serine-threonine/t
Lj0g3v0285319	5.23196	5.37102	5.847	LotjaGi1g1v0165200	Oxoglutarate/iron-dependent dioxygenase
Lj0g3v0115389	1.58341	1.79836	1.67144	LotjaGi3g1v0421800	Disease resistance protein
Lj0g3v0285989	1.30397	0.931124	0.844626	LotjaGi6g1v0096200	NA
Lj0g3v0188899	3.54955	3.27051	4.38798	LotjaGi6g1v0147700	Cytochrome P450
Lj4g3v0485450	1.2968	1.49268	1.8328	LotjaGi4g1v0063200	Cytochrome P450
Lj0g3v0144649	1.35212	1.06459	1.3863	LotjaGi1g1v0330200	GRF zinc finger containing protein
Lj0g3v0270819	1.32823	1.23846	1.40486	LotjaGi4g1v0241200	NA
Lj0g3v0128669	3.25893	3.5237	3.82382	LotjaGi1g1v0733200	Plant disease resistance response protein
Lj1g3v1786360	1.79981	1.86369	1.61545	LotjaGi1g1v0367800	NA
Lj4g3v0485460	1.28993	1.4803	1.81652	LotjaGi4g1v0063200	Cytochrome P450
Lj4g3v0109440	1.40195	1.01173	1.14142	LotjaGi4g1v0006400	NA
Lj2g3v0721200	1.41137	1.25961	1.1737	LotjaGi2g1v0205600	Protein kinase
Lj5g3v1129670	0.697321	0.897115	0.805538	NA	NA
Lj6g3v0059000	0.771074	0.868272	0.904199	LotjaGi5g1v0159600	NA
Lj0g3v0146729	2.75262	2.46877	2.27226	LotjaGi2g1v0307400	WRKY
Lj0g3v0009129	0.987377	0.837996	0.685365	NA	NA
Lj1g3v3329710	1.4349	1.20016	1.16757	LotjaGi1g1v0554900	Calmodulin binding protein
Lj0g3v0303549	3.54001	4.01055	4.06413	LotjaGi4g1v0142900	Protein kinase
Lj2g3v1373380	0.931622	0.997708	0.817022	LotjaGi2g1v0315200	TFIIB and Retinob,Cyclin-like
Lj0g3v0121149	2.80816	2.1932	1.39632	LotjaGi4g1v0095900	NA
Lj0g3v0100779	1.51393	2.0348	2.33233	LotjaGi3g1v0383900	Protein kinase
Lj3g3v0697060	3.8452	2.79238	1.97024	LotjaGi3g1v0080600	NA
Lj4g3v2618530	2.95986	2.47965	1.84394	LotjaGi4g1v0381200	NA
Lj4g3v2618540	2.95986	2.47965	1.84394	LotjaGi4g1v0381200	NA
Lj0g3v0199649	0.788221	0.694891	0.656168	LotjaGi4g1v0001000	Non-lysosomal glucosylceramidase (Fragment)
Lj4g3v0109450	1.37889	1.02249	1.1049	LotjaGi4g1v0006400	ISP4 LIKE PROTEIN
Lj5g3v1913760	0.982245	0.764259	0.795301	LotjaGi5g1v0286800	Endonuclease/exonuclease/phosphatase
Lj4g3v2400800	0.670679	0.83031	0.809209	LotjaGi4g1v0352600	Domain of unknown function DUF3700
Lj0g3v0256819	0.837191	0.95383	1.08447	NA	NA
Lj2g3v1022210	0.837191	0.95383	1.08447	NA	NA
Lj1g3v2268430	0.725423	0.730333	0.741445	LotjaGi1g1v0434300	WNK1
Lj2g3v1550330	1.94958	2.0547	1.79975	LotjaGi2g1v0347500	Receptor kinase-like protein
Lj2g3v0780570	1.01553	1.40853	1.67707	LotjaGi2g1v0398500	CXE carboxylesterase
Lj2g3v0632400	0.916424	0.772132	0.922352	LotjaGi2g1v0185000	Cyclic nucleotide-binding-like
Lj3g3v1128990	0.912781	1.20265	1.07808	LotjaGi3g1v0481200	Lysine histidine
Lj4g3v0620030	8.82047	9.60801	8.9107	LotjaGi4g1v0075700	NA
Lj0g3v0336269	0.810426	0.840019	0.949062	LotjaGi1g1v0150600	Basic-leucine zipper domain
Lj3g3v1739280	0.911517	0.869736	0.787395	LotjaGi3g1v0307700	Protein kinase
Lj1g3v0873010	4.82539	5.59219	6.09199	LotjaGi1g1v0264200	Natural resistance-associated macrophage protein 1
Lj0g3v0205729	0.613028	0.77689	0.752347	LotjaGi1g1v0240300	Leucine-rich repeats
Lj2g3v0634920	0.841942	0.588662	0.586205	LotjaGi2g1v0186500	DISEASE RESISTANCE PROTEIN (TIR-NBS-LRR CLASS)
Lj4g3v2785710	0.912324	0.622212	0.653415	LotjaGi4g1v0405000	SOLUTE CARRIER FAMILY 35
Lj6g3v1707370	0.673023	0.692603	0.730458	LotjaGi6g1v0281400	Nuclear inhibitor of protein phosphatase 1
Lj6g3v1707380	0.686215	0.707666	0.749452	LotjaGi6g1v0281400	NA
Lj5g3v0692300	1.17984	0.776551	0.705811	LotjaGi6g1v0231200	Cytokinin dehydrogenase 1
Lj2g3v2082320	1.26795	1.32216	1.50243	LotjaGi2g1v0437200	Ferredoxin reductase-type FAD-binding
Lj0g3v0117029	2.44378	1.83916	1.79284	LotjaGi2g1v0307400	NA
Lj0g3v0128709	1.5099	1.15483	1.27366	LotjaGi3g1v0105200	Disease resistance protein
Lj0g3v0284719	1.78744	1.55534	1.52488	LotjaGi4g1v0284200	Glycoside hydrolase
Lj6g3v1826350	1.58258	1.34138	1.10646	LotjaGi6g1v0292500	Protein kinase
Lj5g3v1699020	3.65381	3.45938	3.24863	LotjaGi5g1v0254000	AMP-binding
Lj6g3v2017610	3.65381	3.45938	3.24863	LotjaGi5g1v0254000	NA
Lj0g3v0361269	2.56407	2.44575	2.82793	LotjaGi3g1v0209600	ZINC FINGER (C3HC4-TYPE RING FINGER) FAMILY PROTEIN
Lj0g3v0185799	5.78581	5.20093	4.04464	NA	NA
Lj4g3v0620060	8.82054	9.62405	8.92518	LotjaGi4g1v0075800	PLC-like phosphodiesterases
Lj5g3v2013870	1.20321	0.785353	0.694815	LotjaGi5g1v0301700	MYB
Lj0g3v0316289	2.47725	2.7556	2.83966	LotjaGi3g1v0083800	60S RIBOSOMAL PROTEIN L10
Lj2g3v3018620	2.85255	3.29393	2.76378	NA	NA
Lj1g3v4204470	1.52544	1.89033	2.2063	LotjaGi1g1v0668200	2OG-FE(II) OXYGENASE FAMILY PROTEIN
Lj2g3v1829910	1.59572	1.4141	1.35061	LotjaGi2g1v0397700	alpha/beta-Hydrolases
Lj6g3v2115780	2.70946	2.73648	2.41437	NA	NA
Lj1g3v3329880	0.641228	0.760495	0.833611	LotjaGi1g1v0555200	No apical meristem (NAM) protein
Lj6g3v2170750	2.62836	3.00272	3.896	LotjaGi6g1v0345300	PR-1-like
Lj1g3v0862950	3.00253	3.60879	4.21987	LotjaGi1g1v0264200	NA
Lj0g3v0248199	2.01218	2.08202	2.54269	NA	NA
Lj0g3v0336279	0.747651	0.787432	0.905422	LotjaGi1g1v0150600	NA
Lj1g3v3704700	1.28854	1.06951	0.929923	NA	NA
Lj1g3v4564780	1.28854	1.06951	0.929923	NA	NA
Lj0g3v0283859	2.20015	2.0048	1.8581	LotjaGi3g1v0193300	Transcription factor GRAS
Lj6g3v1953910	0.876672	0.910077	0.663082	NA	NA
Lj0g3v0099859	1.32095	0.989873	0.956053	LotjaGi5g1v0242200	2OG-FE(II) OXYGENASE FAMILY PROTEIN
Lj5g3v1793540	5.08444	7.03487	7.76003	NA	NA
Lj1g3v5021150	3.64926	3.6102	3.93775	LotjaGi1g1v0788000	Glycoside hydrolase
Lj0g3v0182399	1.52914	2.03384	2.39033	NA	Metallothionein
Lj2g3v1549600	0.771449	0.667511	0.601863	LotjaGi2g1v0343300	CYCLOPS
Lj3g3v2848790	2.43507	2.39343	1.22663	NA	Gag-pol polyprotein
Lj3g3v0948300	1.81105	1.94814	2.16002	NA	GRF zinc finger-containing protein-like protein (Fragment)
Lj4g3v0669810	0.738917	0.709958	0.91912	LotjaGi4g1v0087700	NA
Lj1g3v3458530	3.03364	2.80968	3.4117	LotjaGi1g1v0581300	Protein phosphatase 2C-like
Lj0g3v0065479	0.978633	1.3177	1.11659	LotjaGi5g1v0222000	Zinc finger, C2H2
Lj0g3v0219529	3.57421	3.22953	4.12369	NA	NA
Lj1g3v2126120	0.945353	0.95434	1.06269	LotjaGi1g1v0421000	Glycoside hydrolase
Lj1g3v4139540	0.83365	0.757187	0.609053	LotjaGi1g1v0081100	Homeodomain-like
Lj3g3v2721400	1.99188	2.05398	1.61705	NA	NA
Lj5g3v0875860	1.44429	1.43712	1.16739	LotjaGi5g1v0136200	NA
Lj0g3v0015379	4.40369	5.95754	6.52282	LotjaGi2g1v0169000	DUF599
Lj5g3v0626850	0.716326	0.646201	0.761271	LotjaGi5g1v0077300	Zinc finger, RING-CH-type
Lj6g3v1901340	1.25482	1.83674	1.38078	LotjaGi6g1v0302300	S-adenosylmethionine decarboxylase
Lj0g3v0199229	1.65063	1.83189	2.31083	LotjaGi3g1v0374200	Glutaredoxin
Lj1g3v2011920	3.52282	4.19385	4.4111	LotjaGi2g1v0293800	Cytochrome P450
Lj0g3v0161279	1.4458	1.82131	2.27635	LotjaGi5g1v0196200	NA
Lj5g3v1341940	1.21714	0.923744	0.944116	LotjaGi5g1v0207800	Phosphoenolpyruvate carboxylase kinase
Lj4g3v0338230	0.789821	0.777243	0.596377	LotjaGi6g1v0354300	Sulphate
Lj5g3v0196770	1.25885	1.43749	1.68532	LotjaGi2g1v0235100	Oxidosqualene cyclase
Lj0g3v0156339	4.92885	4.11323	4.30841	NA	NA
Lj0g3v0229339	5.78279	6.31322	6.86928	LotjaGi5g1v0144000	Cytochrome P450
Lj1g3v3704770	1.2935	1.05507	0.894106	NA	NA
Lj1g3v4564850	1.2935	1.05507	0.894106	NA	NA
Lj6g3v1931790	2.10778	2.30351	1.722	LotjaGi6g1v0307900	AP2/ERF domain
Lj0g3v0268619	1.13715	0.9588	1.33958	LotjaGi4g1v0282800	NA
Lj3g3v2416340	2.50083	2.50946	3.28315	LotjaGi3g1v0393000	NA
Lj1g3v4317580	3.26999	3.25895	2.98656	LotjaGi1g1v0725800	NA
Lj5g3v0106070	1.54923	1.76135	1.989	LotjaGi1g1v0437300	3-ketoacyl-CoA synthase
Lj0g3v0047029	1.21538	1.15144	1.06791	NA	NA
Lj3g3v1993850	1.31475	1.45768	1.43891	NA	NA
Lj0g3v0212039	1.53125	1.64874	1.70367	LotjaGi3g1v0421800	Tir-nbs-lrr resistance protein
Lj0g3v0109249	2.09003	1.68966	1.76913	LotjaGi5g1v0062600	Oxoglutarate/iron-dependent dioxygenase
Lj0g3v0205749	2.33117	2.4347	2.65023	NA	NA
Lj1g3v3020980	0.87053	1.12938	1.21765	LotjaGi1g1v0511600	UDP-glucuronosyl/UDP-glucosyl
Lj4g3v2668520	1.28148	1.26649	1.83109	NA	NA
Lj6g3v1953920	0.848518	0.808246	0.727704	NA	NA
Lj2g3v1550590	2.65876	2.79813	2.98035	NA	NA
Lj6g3v1790920	1.86698	1.48126	1.4691	LotjaGi6g1v0289100	Zinc finger, RING-type
Lj6g3v2006310	0.989971	0.807443	0.705776	LotjaGi6g1v0326800	Somatic embryogenesis receptor-like kinase
Lj0g3v0177679	1.08318	1.44949	1.53279	LotjaGi5g1v0218800	Putative basic helix-loop-helix protein BHLH26
Lj3g3v3243140	0.908168	0.780262	0.712437	LotjaGi3g1v0493400	PRICHEXTENSN
Lj2g3v2449270	2.95854	3.40694	3.93701	LotjaGi1g1v0104000	Metal tolerance protein
Lj3g3v0937830	2.90011	2.81306	2.68583	LotjaGi3g1v0130700	Protein kinase
Lj0g3v0115909	1.90513	1.19735	1.16959	LotjaGi2g1v0152100	Gibberellin 20-oxidase
Lj2g3v1589610	0.688636	0.678044	0.808055	LotjaGi2g1v0353900	Glutamate receptor
Lj1g3v3975850	1.48157	1.37877	1.37039	LotjaGi1g1v0646300	Ankyrin repeat
Lj2g3v0253390	1.65271	1.81128	1.71145	NA	NA
Lj2g3v1002730	3.79493	4.09749	4.4514	NA	NA
Lj2g3v2017580	0.730175	0.818119	0.756704	LotjaGi2g1v0433000	Serine-threonine/tyrosine-protein kinase
Lj1g3v3218120	0.700061	0.667227	0.61627	LotjaGi1g1v0536500	NA
Lj5g3v2058570	1.42386	1.42025	2.10366	LotjaGi5g1v0316900	DUF3049
Lj0g3v0013599	1.43483	1.97336	2.14123	LotjaGi1g1v0089200	Expansin
Lj0g3v0153909	1.43483	1.97336	2.14123	LotjaGi1g1v0089200	Expansin
Lj0g3v0074079	1.49016	1.66558	1.77722	LotjaGi1g1v0780600	Aldo/keto-reductase family protein
Lj4g3v0484030	0.606788	0.914718	0.850146	NA	NA
Lj1g3v2977060	0.606788	0.914718	0.849712	NA	NA
Lj5g3v2297890	2.26719	2.41227	2.17417	LotjaGi1g1v0418500	NA
Lj0g3v0185829	3.91999	4.46774	3.17662	LotjaGi1g1v0508300	NA
Lj2g3v1017640	0.610597	0.713179	0.774497	NA	NHL REPEAT-CONTAINING PROTEIN
Lj0g3v0241459	1.60741	1.27071	0.995841	LotjaGi3g1v0379900	Glucose/ribitol dehydrogenase
Lj0g3v0162419	0.725586	0.687621	0.809407	LotjaGi3g1v0220300	S-adenosyl-L-methionine-dependent methyl
Lj2g3v0604100	1.41454	1.45197	1.33339	LotjaGi6g1v0303100	Auxin-induced protein 5NG4
Lj3g3v2261380	1.09461	1.22081	1.12382	LotjaGi3g1v0362200	NA
Lj0g3v0183329	1.55482	1.93392	2.26493	NA	NA
Lj4g3v0484040	0.591135	0.923634	0.864586	NA	NA
Lj3g3v1309570	1.4568	1.67398	1.89222	LotjaGi3g1v0189100	Cytochrome P450
Lj0g3v0212029	1.46726	1.52917	1.60481	NA	NA
Lj1g3v2977050	0.591135	0.923634	0.864146	NA	NA
Lj5g3v0659440	0.824617	0.892216	1.01795	NA	Proliferating cell nuclear antigen
Lj0g3v0299319	1.40973	1.55713	1.88589	LotjaGi1g1v0133400	HLH
Lj5g3v0108500	0.776235	0.805647	0.961447	LotjaGi5g1v0013700	NA
Lj0g3v0120179	0.655193	0.725213	0.680216	LotjaGi2g1v0190800	Annexin
Lj0g3v0104999	4.15061	4.6073	5.25882	LotjaGi3g1v0385900	Ferredoxin reductase-like
Lj2g3v1369250	2.29176	2.293	2.41307	NA	Zinc finger, C2H2
Lj6g3v1418060	2.29176	2.293	2.41307	NA	Zinc finger, C2H2
Lj0g3v0164379	0.819433	1.22658	1.19897	LotjaGi3g1v0451600	NA
Lj0g3v0164389	0.819433	1.22658	1.19897	NA	NA
Lj0g3v0246289	2.16512	2.23227	2.31524	NA	NA
Lj2g3v0631950	2.48965	2.46532	2.81088	NA	NA
Lj3g3v2848800	2.15518	2.09975	0.987225	LotjaGi3g1v0449330	CLE14 protein
Lj4g3v1725030	2.12609	1.85128	2.19385	LotjaGi4g1v0256300	Cytochrome P450
Lj2g3v2151670	1.44535	1.65318	2.05957	LotjaGi1g1v0133400	HLH
Lj2g3v1415130	0.826344	1.65808	1.81023	LotjaGi2g1v0322800	PC-Esterase
Lj1g3v4303220	2.82343	2.27402	2.21467	LotjaGi1g1v0723800	Cytochrome P450
Lj5g3v1157340	1.01091	1.02706	1.09095	LotjaGi4g1v0315300	NA
Lj0g3v0105009	4.30521	4.7713	5.42555	LotjaGi3g1v0385900	NAD binding
Lj0g3v0017889	1.53205	1.60773	1.82593	NA	NA
Lj3g3v1993800	4.81523	5.23682	5.62085	NA	NA
Lj0g3v0336879	2.66516	2.83864	2.97847	LotjaGi1g1v0453100	Heme-dependent peroxidases
Lj3g3v1983600	0.922002	0.991679	0.876263	LotjaGi3g1v0338500	Cytochrome P450
Lj1g3v1498440	2.89115	3.07352	3.62886	LotjaGi1g1v0336700	Myristoyl-acyl carrier protein thioesterase
Lj0g3v0273259	0.859885	0.675678	0.772151	LotjaGi2g1v0174600	Toll/interleukin-1 receptor homology (TIR)
Lj0g3v0068549	1.29921	1.19958	0.714238	LotjaGi5g1v0047400	DUF599
Lj0g3v0265719	1.70509	1.39201	1.76551	NA	DNA/RNA polymerase
Lj5g3v1793650	6.49331	8.53344	9.34798	NA	NA
Lj4g3v2526000	1.04124	1.07053	0.646853	LotjaGi4g1v0328700	Ankyrin repeat
Lj6g3v1370740	1.55684	1.8178	1.5702	LotjaGi6g1v0241000	Protein kinase
Lj2g3v1415140	0.858473	1.71264	1.85944	NA	NA
Lj3g3v1739270	0.807549	0.709363	0.661096	LotjaGi3g1v0307800	Basic-leucine zipper domain
Lj4g3v1415280	1.86786	1.04094	1.05196	LotjaGi4g1v0227900	NA
Lj6g3v1945170	1.51916	1.4516	1.53169	LotjaGi6g1v0309500	Oxoglutarate/iron-dependent dioxygenase
Lj2g3v2904660	1.67818	1.31734	1.5407	NA	NA
Lj1g3v0811910	2.28818	2.02404	2.35944	LotjaGi4g1v0256300	Cytochrome P450
Lj4g3v3003860	1.09366	1.06258	0.786966	NA	NA
Lj0g3v0300769	0.712102	0.638777	0.706221	LotjaGi5g1v0077300	Zinc finger, RING-CH-type
Lj0g3v0261849	1.15164	1.20867	1.42313	NA	NA
Lj6g3v1693920	1.32731	0.944814	1.48068	NA	NA
Lj6g3v1693930	1.32731	0.944814	1.48068	NA	NA
Lj2g3v0914430	1.21281	1.4196	1.59952	LotjaGi2g1v0235100	NA
Lj0g3v0132959	3.06228	3.88216	4.47504	NA	NA
Lj5g3v1511500	0.667543	0.714001	0.771557	LotjaGi5g1v0227300	WD40/YVTN repeat-like-containing
Lj6g3v1918310	3.43932	2.66084	2.40479	LotjaGi6g1v0306400	NA
Lj5g3v1341920	1.19161	0.907077	0.948864	LotjaGi5g1v0207800	NA
Lj1g3v2432890	6.92846	7.25358	7.14834	NA	Transmembrane protein
Lj6g3v1370750	1.6333	1.94211	1.65082	LotjaGi6g1v0241000	Protein kinase
Lj0g3v0275209	2.51649	2.54356	3.49391	LotjaGi1g1v0172900	Protein kinase-like (PK-like)
Lj4g3v1935530	1.01128	1.21237	1.56488	LotjaGi4g1v0279400	Diacylglycerol glucosyl
Lj1g3v3833870	4.94665	6.3681	7.23977	LotjaGi1g1v0620100	Cupin 1
Lj3g3v0787300	1.10768	1.68296	2.32749	LotjaGi3g1v0105900	1-aminocyclopropane-1-carboxylate oxidase-like protein
Lj6g3v1966960	1.29849	1.29435	1.59514	LotjaGi6g1v0316800	Aquaporin NIP1-2
Lj1g3v3833880	4.97106	6.39538	7.2715	LotjaGi1g1v0620100	NA
Lj4g3v2666360	0.909346	1.17988	1.20677	LotjaGi4g1v0386600	Cytochrome P450
Lj0g3v0360999	4.74029	5.30731	5.93098	LotjaGi3g1v0385900	NA
Lj4g3v2858490	0.66045	0.650401	0.604518	LotjaGi2g1v0190800	Annexin
Lj6g3v0468630	1.10755	1.49187	1.57307	LotjaGi5g1v0218800	Putative basic helix-loop-helix protein BHLH26
Lj0g3v0101199	2.54702	2.70367	2.86104	LotjaGi6g1v0026200	Endoglucanase
Lj3g3v2416350	0.702637	0.799368	0.916999	LotjaGi3g1v0393100	Protein of unknown function DUF3133
Lj2g3v0648040	3.25452	3.47026	2.8796	NA	NA
Lj4g3v3003840	4.69036	4.11725	4.98826	NA	NA
Lj0g3v0199639	0.775779	0.716561	0.658795	LotjaGi4g1v0001000	Six-hairpin glycosidases
Lj1g3v3244590	1.63062	1.66098	1.04087	LotjaGi1g1v0544900	NA
Lj0g3v0163209	2.89223	2.835	2.75573	LotjaGi3g1v0379900	NAD(P)-binding
Lj4g3v0484870	1.39089	1.24469	1.41994	LotjaGi1g1v0330200	GRF zinc finger containing protein
Lj2g3v0648050	2.97164	3.27286	2.8028	LotjaGi1g1v0345100	NA
Lj3g3v0965850	1.40112	1.24537	1.41893	LotjaGi1g1v0330200	GRF zinc finger containing protein
Lj1g3v1147610	1.18212	1.3858	1.29086	LotjaGi1g1v0306900	NA
Lj3g3v3639170	0.755608	1.03411	1.24333	LotjaGi3g1v0539700	NAD(P)-binding
Lj0g3v0281629	1.59425	1.50139	1.11847	NA	NA
Lj0g3v0203979	1.24333	1.47421	1.86684	LotjaGi1g1v0616400	NA
Lj3g3v3337420	2.27431	2.04429	1.78562	LotjaGi3g1v0502900	G protein alpha subunit
Lj0g3v0316509	1.31519	1.23394	1.56793	LotjaGi1g1v0218900	Putative copper ion-binding laccase
Lj0g3v0155789	2.01643	2.5135	2.83931	LotjaGi1g1v0668100	NA
Lj3g3v0787290	1.17468	1.79685	2.47741	LotjaGi3g1v0105800	NA
Lj4g3v1600360	1.01637	0.902125	1.00025	LotjaGi4g1v0244400	TolB-like
Lj4g3v2512830	0.904622	0.95533	0.8948	LotjaGi4g1v0362700	2OG-FeII_Oxy,Oxoglutarate/iron-dependent dioxygenase
Lj4g3v2616100	1.23796	1.63358	1.62411	LotjaGi4g1v0379600	NA
Lj3g3v2040000	1.92147	1.97492	1.68713	NA	NA
Lj6g3v1249680	1.20235	1.29817	1.39916	LotjaGi6g1v0231600	Protein of unknown function DUF761
Lj0g3v0167129	1.82329	1.69196	1.61711	LotjaGi3g1v0486000	Peptidase S10
Lj5g3v1314550	1.29627	1.32601	1.63769	LotjaGi5g1v0205600	NA
Lj5g3v1083950	3.31077	4.49704	5.90851	LotjaGi5g1v0182100	NA
Lj0g3v0079849	0.676238	0.783679	0.911527	LotjaGi1g1v0575800	Expansin A5a
Lj0g3v0020729	0.676795	0.783679	0.911527	LotjaGi1g1v0575800	Expansin A5a
Lj0g3v0240669	0.676795	0.783679	0.911527	LotjaGi1g1v0575800	Expansin A5a
Lj0g3v0309849	1.27315	1.10466	1.34559	LotjaGi1g1v0330200	GRF zinc finger containing protein
Lj4g3v0000020	0.80903	0.770228	0.730196	LotjaGi4g1v0001000	Six-hairpin glycosidases
Lj1g3v0897610	2.18084	2.35456	3.16089	LotjaGi1g1v0267300	Protein kinase
Lj1g3v0862940	1.91924	2.34471	2.94975	LotjaGi1g1v0264100	DUF2372,Proteasome assembly chaperone 3
Lj4g3v0450480	0.85739	1.01949	1.07632	LotjaGi4g1v0053100	Zinc finger, Dof-type
Lj5g3v1452280	0.997839	1.37923	1.43887	LotjaGi5g1v0218800	NA
Lj4g3v2226740	0.933641	0.922588	0.984475	LotjaGi4g1v0315300	NA
Lj4g3v0000010	0.81877	0.772964	0.740046	LotjaGi4g1v0001000	NA
Lj0g3v0183369	1.56181	1.96683	2.27769	NA	NA
Lj3g3v1126820	3.14908	3.62788	3.87029	LotjaGi3g1v0171800	ZINC FINGER FYVE DOMAIN CONTAINING PROTEIN
Lj0g3v0271889	0.705554	0.836774	1.05311	LotjaGi1g1v0287800	NA
Lj2g3v2536470	0.797298	0.850078	0.928291	LotjaGi1g1v0097300	Zinc finger, C2H2
Lj0g3v0119379	1.32044	0.962599	1.38042	NA	NA
Lj4g3v2990070	0.937482	0.955119	0.863228	LotjaGi4g1v0429900	NA
Lj6g3v1629680	8.06636	6.26888	6.05159	LotjaGi6g1v0268600	GERMIN
Lj0g3v0234849	1.10009	1.36435	1.33978	LotjaGi3g1v0421800	NA
Lj1g3v3833760	4.57748	5.88093	6.68211	LotjaGi1g1v0620100	GERMIN
Lj3g3v0428740	3.25535	2.49136	1.93749	NA	NA
Lj4g3v0473400	2.99785	2.7693	3.16515	LotjaGi4g1v0060700	Cytochrome P450
Lj0g3v0128699	1.43833	1.14843	1.2672	LotjaGi3g1v0105200	Disease resistance protein
Lj0g3v0115399	1.52036	1.62733	1.66332	LotjaGi3g1v0421800	Tir-nbs-lrr resistance protein
Lj5g3v0615800	2.13413	2.5739	2.4521	LotjaGi5g1v0073000	NA
Lj2g3v1102970	0.67992	0.859755	0.728553	LotjaGi2g1v0267700	Protein kinase
Lj1g3v1060460	1.5659	1.67042	1.93019	NA	NA
Lj0g3v0040929	0.624381	0.599503	0.657504	LotjaGi5g1v0197800	DUF599
Lj0g3v0335709	2.97169	3.56692	3.82317	LotjaGi1g1v0297800	F-box protein
Lj4g3v2249150	2.34907	2.82618	3.45386	LotjaGi4g1v0313100	NA
Lj1g3v3718130	1.16235	1.40263	1.8205	LotjaGi1g1v0616400	Cc-nbs-lrr resistance protein
Lj0g3v0182389	1.55239	2.01525	2.39806	NA	NA
Lj0g3v0127009	1.74813	1.80779	1.97947	NA	NA
Lj0g3v0265729	1.09219	1.10331	1.39542	LotjaGi6g1v0316800	NODULIN-26-RELATED
Lj0g3v0340359	3.89622	3.76485	3.97812	LotjaGi1g1v0075400	RING FINGER PROTEIN 6/12/38
Lj3g3v0965390	3.41979	4.12433	4.64449	LotjaGi3g1v0138900	2OG-FE(II) OXYGENASE FAMILY PROTEIN
Lj2g3v2088050	1.77268	1.29969	1.44182	LotjaGi2g1v0440500	NA
Lj6g3v0227550	3.56709	4.84497	5.54149	LotjaGi6g1v0032600	Glycoside hydrolase
Lj5g3v1314560	1.29834	1.32324	1.63769	LotjaGi5g1v0205600	NA
Lj1g3v1648970	0.721769	0.872661	1.08154	LotjaGi1g1v0353600	CARBOXYLESTERASE-RELATED
Lj6g3v0410600	1.0043	1.04698	1.13581	LotjaGi6g1v0055500	DIPHOSPHOINOSITOL POLYPHOSPHATE PHOSPHOHYDROLASE
Lj3g3v0930310	1.39427	1.05118	1.24433	LotjaGi3g1v0127700	NA
Lj1g3v2215390	0.877453	0.913043	0.621989	LotjaGi1g1v0430800	LATERAL SIGNALING TARGET PROTEIN 2
Lj0g3v0309109	1.21183	1.07092	1.26787	LotjaGi5g1v0265300	Protein kinase
Lj0g3v0231689	1.96016	1.91575	1.56672	NA	NA
Lj1g3v4691670	2.5284	2.66561	3.04854	LotjaGi1g1v0683100	Replication factor A protein
Lj5g3v0615810	2.14635	2.59569	2.48438	NA	NA
Lj0g3v0241849	0.954394	0.683411	0.653726	LotjaGi5g1v0286800	NA
Lj0g3v0129419	0.767782	0.872052	0.87772	LotjaGi1g1v0026700	NA
Lj4g3v1037630	3.103	3.66536	4.66018	LotjaGi4g1v0127900	F3H
Lj3g3v1993860	4.42316	4.71361	4.91043	NA	NA
Lj4g3v2541450	3.87653	3.78527	3.97807	LotjaGi4g1v0365500	Cytochrome P450
Lj3g3v1383560	2.3721	2.26341	2.60691	LotjaGi3g1v0202200	Ferroporti-1
Lj0g3v0056019	2.67793	2.97457	2.96117	LotjaGi1g1v0624100	SULFITE REDUCTASE
Lj4g3v2401120	2.75718	2.70009	3.00651	LotjaGi4g1v0354700	Oxoglutarate/iron-dependent dioxygenase
Lj1g3v0682850	1.02608	0.66307	0.870885	LotjaGi1g1v0228700	Copalyl diphosphate synthase (Fragment)
Lj0g3v0110639	3.97105	3.28468	3.46466	NA	NA
Lj3g3v2681670	7.01566	7.52992	7.71059	LotjaGi1g1v0123500	OLIGOPEPTIDE TRANSPORTER-RELATED
Lj1g3v4564880	1.47257	1.36386	1.3495	LotjaGi1g1v0698100	NA
Lj4g3v0484050	0.614152	1.01553	0.926995	NA	NA
Lj4g3v2512820	0.837217	0.926824	0.890467	LotjaGi4g1v0362700	2OG-FE(II) OXYGENASE FAMILY PROTEIN
Lj1g3v2977040	0.614028	1.01517	0.926627	NA	NA
Lj4g3v0450470	0.819674	1.03373	1.09181	LotjaGi4g1v0053100	Zinc finger, Dof-type
Lj0g3v0332289	1.71547	1.79832	1.71954	LotjaGi3g1v0195000	Pyruvate decarboxylase 1
Lj0g3v0275219	2.27146	2.2251	2.58213	LotjaGi1g1v0172800	NA
Lj0g3v0304439	4.83901	5.09987	5.52033	LotjaGi1g1v0376900	Concanavalin A-like lectin/glucanase
Lj2g3v1849250	1.33078	1.52834	1.60337	LotjaGi4g1v0106500	NA
Lj0g3v0139579	1.24372	1.30373	1.28211	LotjaGi4g1v0236600	ARR3
Lj3g3v0838300	1.67968	2.16467	1.96278	LotjaGi3g1v0122700	Ferric reductase defective 3b
Lj3g3v1695680	0.772594	0.75383	0.828619	LotjaGi3g1v0288600	Zinc/iron permease
Lj1g3v3704800	1.46578	1.36385	1.3495	LotjaGi1g1v0698100	EamA,Drug/metabolite
Lj4g3v0758320	1.91096	1.80222	1.30791	LotjaGi4g1v0095800	NA
Lj2g3v3133590	1.95567	1.97049	2.0515	LotjaGi1g1v0035800	NA
Lj1g3v1486250	6.44651	7.14245	7.90919	LotjaGi1g1v0336200	Transferase
Lj3g3v1341620	0.839279	1.01242	1.12934	LotjaGi3g1v0192200	HLH
Lj2g3v2003100	0.849762	0.78813	0.921023	LotjaGi2g1v0430200	Phospholipase D
Lj0g3v0063339	1.36635	1.25589	1.19456	LotjaGi3g1v0148100	NA
Lj0g3v0144589	0.807883	1.08787	1.07046	LotjaGi5g1v0115200	NAD(P)-binding
Lj0g3v0161899	0.966493	1.01434	1.09468	LotjaGi5g1v0249200	COPPER AMINE OXIDASE
Lj3g3v2888290	3.19054	4.58374	5.9222	LotjaGi3g1v0462000	Protein kinase-like
Lj5g3v0962910	2.48563	2.362	2.56603	LotjaGi5g1v0164900	NAD(P)-binding Rossmann-fold domains
Lj5g3v0962920	2.48563	2.362	2.56603	LotjaGi5g1v0164900	NAD(P)-binding Rossmann-fold domains
Lj3g3v2921000	2.25735	2.34789	2.72038	LotjaGi1g1v0243400	Replication protein A 70 kDa DNA-binding subunit
Lj0g3v0362909	1.06622	0.90629	0.856313	LotjaGi2g1v0118600	Leucine-rich repeat-containing protein
Lj1g3v1929130	1.08752	0.937048	1.09726	LotjaGi1g1v0388600	Oxoglutarate/iron-dependent dioxygenase
Lj2g3v1890920	1.82002	1.77468	2.44543	LotjaGi2g1v0403000	F-box protein
Lj0g3v0101559	1.84545	1.8324	2.13948	NA	NA
Lj6g3v1882450	1.03747	1.34525	1.40406	LotjaGi6g1v0298600	NA
Lj6g3v1883500	1.03747	1.34525	1.40406	LotjaGi6g1v0298600	NA
Lj1g3v4753440	1.53112	1.25616	1.05535	LotjaGi1g1v0741400	alpha/beta-Hydrolases
Lj0g3v0063329	1.35297	1.23162	1.20037	LotjaGi3g1v0148100	ALCOHOL OXIDASE-RELATED
Lj0g3v0257389	0.676348	0.791807	1.02339	LotjaGi4g1v0136100	Protein kinase
Lj1g3v1222700	2.76935	2.67351	2.90814	LotjaGi1g1v0314000	Ethylene-responsive
Lj0g3v0110649	3.84312	3.16861	3.35618	NA	NA
Lj3g3v3086090	1.2665	1.38861	0.932478	LotjaGi2g1v0361100	Glycoside hydrolase
Lj5g3v0406100	2.94695	3.35005	3.27132	LotjaGi5g1v0043000	Beta-fructofuranosidase, insoluble isoenzyme CWINV1
Lj0g3v0333449	1.75322	2.23498	2.43484	LotjaGi1g1v0121900	UDP-Glycosyl
Lj3g3v1393730	2.46006	2.40171	2.72566	LotjaGi3g1v0202200	NA
Lj0g3v0314319	0.914742	0.693574	0.955246	NA	NA
Lj3g3v1403990	0.699045	0.885926	0.955532	LotjaGi3g1v0203100	Protein kinase
Lj4g3v1684340	1.17152	1.15039	1.22148	LotjaGi4g1v0253300	Zinc finger, C2H2
Lj4g3v1684350	1.17152	1.15039	1.22148	LotjaGi4g1v0253300	Zinc finger, C2H2
Lj1g3v1648920	1.28297	1.53469	1.6155	LotjaGi1g1v0353300	NA
Lj0g3v0047019	1.10957	1.15219	1.09264	LotjaGi2g1v0441700	Protein of unknown function DUF4228
Lj2g3v2088340	1.10957	1.15219	1.09264	LotjaGi2g1v0441700	Protein of unknown function DUF4228
Lj0g3v0077479	2.89099	2.4106	2.75307	NA	NA
Lj4g3v2628700	3.0832	2.83481	3.06312	LotjaGi4g1v0382100	Putative GDSL-like lipase acylhydrolase protein
Lj3g3v1421820	1.02074	1.11719	1.0858	LotjaGi3g1v0152600	Ovate protein family
Lj2g3v2002690	0.847015	0.939099	0.829804	LotjaGi2g1v0427800	NA
Lj0g3v0155809	1.44807	1.86088	2.69921	LotjaGi1g1v0668300	2OG-FE(II) OXYGENASE FAMILY PROTEIN
Lj4g3v2249160	2.01536	2.45256	3.05658	LotjaGi4g1v0313100	ATP-BINDING CASSETTE TRANSPORTER (PDR)
Lj5g3v1867760	0.695175	0.755862	0.632707	LotjaGi3g1v0491900	NA
Lj1g3v0112640	1.93857	1.94513	2.26288	NA	NA
Lj5g3v2045530	1.93857	1.94513	2.26288	NA	NA
Lj4g3v1237990	1.3862	2.48678	2.5824	LotjaGi4g1v0201900	NA
Lj0g3v0263249	1.99102	2.2526	2.81638	LotjaGi3g1v0210800	NA
Lj0g3v0092689	1.14424	0.93123	0.913182	NA	NA
Lj3g3v3236670	0.692475	0.758675	0.632982	LotjaGi3g1v0491900	DUF3527
Lj5g3v0747190	0.782268	0.998157	1.02728	LotjaGi5g1v0115200	NAD-binding
Lj4g3v2704690	0.993906	1.72705	1.41499	LotjaGi4g1v0389300	Cupredoxins
Lj4g3v2068350	0.67293	0.8507	0.94195	LotjaGi4g1v0297800	Allergen V5/Tpx-1-related
Lj1g3v0264200	1.11969	0.823386	0.708767	LotjaGi1g1v0168700	Stearoyl acyl carrier protein desaturase Lldd3A20
Lj5g3v1774980	0.99482	0.922428	0.887275	LotjaGi2g1v0196700	Serine-threonine/t
Lj0g3v0340619	1.11614	0.788145	0.787531	NA	NBS-containing resistance-like protein
Lj0g3v0256809	0.889974	1.00129	1.28076	NA	NA
Lj2g3v1022200	0.889974	1.00129	1.28076	NA	NA
Lj5g3v1654150	0.919559	1.17084	1.14624	NA	Transcription facto
Lj0g3v0128719	1.47674	1.07587	1.14376	LotjaGi3g1v0105200	DISEASE RESISTANCE PROTEIN (TIR-NBS-LRR CLASS)
Lj1g3v1913910	2.01188	2.89858	2.45176	LotjaGi1g1v0387000	NA
Lj0g3v0362649	1.14092	1.02528	0.979118	LotjaGi6g1v0165700	Cytochrome P450 monooxygenase CYP72A65
Lj3g3v2575900	1.47094	1.30681	1.43154	NA	LATERAL SIGNALING TARGET PROTEIN 2
Lj0g3v0180199	3.26201	2.22299	2.60699	LotjaGi3g1v0379900	Glucose/ribitol dehydrogenase
Lj1g3v2066520	2.87582	3.46186	3.26297	LotjaGi1g1v0404500	9-CIS-EPOXYCAROTENOID DIOXYGENASE
Lj4g3v2290260	1.14956	1.62231	2.21518	LotjaGi4g1v0338100	NA
Lj0g3v0185199	3.75586	3.65042	3.92588	LotjaGi4g1v0365500	Cytochrome P450
Lj3g3v0950730	7.20666	8.97974	9.93339	LotjaGi3g1v0134800	Peptidase aspartic
Lj2g3v2783390	1.00504	1.56241	1.6992	LotjaGi6g1v0077600	NA
Lj1g3v3833730	4.89623	6.35949	7.2408	LotjaGi1g1v0620000	NA
Lj5g3v2238680	2.09338	2.40033	2.9663	LotjaGi1g1v0423200	FAD-binding
Lj0g3v0341139	0.809125	0.868656	0.915575	LotjaGi1g1v0382500	ATPase
Lj0g3v0155869	1.93588	2.3166	2.70174	NA	NA
Lj3g3v3451350	1.93588	2.3166	2.70174	NA	NA
Lj2g3v0911840	2.68006	3.04849	3.44618	LotjaGi2g1v0232600	Myb domain
Lj1g3v1648930	2.43703	2.72715	3.14221	LotjaGi1g1v0353400	Patatin-like protein
Lj0g3v0349559	3.75674	3.32145	3.88799	LotjaGi5g1v0355500	Zinc finger, RING-type
Lj5g3v2263970	3.75674	3.32145	3.88799	LotjaGi5g1v0355500	Zinc finger, RING/FYVE/PHD-type
Lj6g3v1914610	0.865717	0.84792	0.922737	LotjaGi6g1v0257900	NA
Lj1g3v3105150	1.04796	0.997256	1.08263	NA	NA
Lj0g3v0101689	1.41654	1.12064	1.04917	LotjaGi3g1v0379900	NAD(P)-binding Rossmann-fold domains
Lj0g3v0230639	0.636886	0.710959	0.759268	LotjaGi0g1v0001500	ACT-like
Lj1g3v4139530	1.49451	1.07957	1.26101	NA	NA
Lj1g3v3833840	4.81658	6.27809	7.15131	LotjaGi1g1v0620000	GERMIN
Lj0g3v0261839	0.858798	0.757617	0.906358	LotjaGi3g1v0113500	NA
Lj2g3v1728960	1.65422	1.92482	0.985695	LotjaGi2g1v0386800	NA
Lj0g3v0304449	3.4503	2.80373	3.25529	NA	NA
Lj3g3v1993810	3.39901	3.78083	4.00073	NA	NA
Lj0g3v0214389	1.26767	1.5924	1.78302	LotjaGi1g1v0598900	UDP-GLUCOSYLTRANSFERASE
Lj0g3v0082369	0.962348	1.02446	0.983747	LotjaGi4g1v0107800	Protein kinase
Lj4g3v2253610	3.05874	3.49989	3.44995	LotjaGi4g1v0333500	SERPIN
Lj5g3v1426530	6.43128	5.14424	5.17393	NA	NA
Lj2g3v0535740	2.00568	2.16505	1.69988	NA	NA
Lj0g3v0238419	2.82863	2.36847	2.69501	NA	NA
Lj1g3v4691580	1.11888	1.10841	1.10776	LotjaGi5g1v0088200	Uracil
Lj4g3v0216610	0.912254	0.613448	0.696027	LotjaGi1g1v0054600	Protein kinase
Lj3g3v3200820	0.92478	0.984053	0.702359	LotjaGi2g1v0373100	ENTH-domain-containing protein
Lj6g3v1707360	0.874073	0.970039	0.884471	LotjaGi6g1v0281300	BTB/POZ fold
Lj5g3v2238670	1.87048	2.10884	2.65636	LotjaGi1g1v0423200	FAD linked oxidase
Lj1g3v1062540	0.869506	0.99239	1.03723	LotjaGi1g1v0295300	RNA recognition motif
Lj0g3v0299129	1.55098	1.77863	1.87062	NA	Putative disease-resistance protein SR1
Lj3g3v3016610	0.818813	1.13825	1.12224	LotjaGi3g1v0481200	AMINO ACID TRANSPORTER
Lj1g3v2035130	4.65848	4.93014	5.82412	LotjaGi1g1v0398100	No apical meristem (NAM) protein
Lj2g3v1002720	3.96629	4.85426	5.70637	LotjaGi2g1v0245800	FAR1-related protein
Lj3g3v2848980	1.24572	1.75757	1.71747	LotjaGi3g1v0450300	STEROL REGULATORY ELEMENT-BINDING PROTEIN
Lj2g3v2172950	1.45388	1.14276	1.52576	NA	NA
Lj1g3v2954760	1.82964	2.03054	2.32877	LotjaGi1g1v0500500	Glucose dehydrogenase
Lj4g3v1561740	1.38178	1.44164	1.52056	LotjaGi4g1v0236600	NA
Lj5g3v0085200	1.50475	1.8344	2.0208	LotjaGi5g1v0018800	NA
Lj1g3v4204460	1.38865	1.81362	2.68626	LotjaGi1g1v0668300	Oxoglutarate/iron-dependent dioxygenase
Lj6g3v1985690	2.64523	3.08854	3.91744	LotjaGi6g1v0323300	NA
Lj3g3v1855670	6.22483	7.53724	7.75141	LotjaGi3g1v0312900	EamA,Drug/metabolite
Lj6g3v1249690	1.50876	1.57853	1.67527	LotjaGi6g1v0231600	Protein of unknown function DUF761
Lj6g3v1368640	1.78122	1.86201	1.6025	LotjaGi6g1v0241000	Protein kinase
Lj1g3v2313000	0.832374	0.857186	0.80886	LotjaGi1g1v0439600	NA
Lj4g3v2973690	1.05239	1.10395	0.899226	LotjaGi4g1v0428700	NA
Lj0g3v0146289	5.95976	5.38899	5.08062	NA	NA
Lj3g3v1378160	2.67606	1.97501	1.82345	NA	NA
Lj4g3v3114100	0.860291	0.964886	1.08015	LotjaGi4g1v0461500	MATE EFFLUX FAMILY PROTEIN
Lj0g3v0047009	1.13003	1.07605	0.97064	NA	NA
Lj2g3v2088330	1.13003	1.07605	0.97064	NA	NA
Lj0g3v0348489	1.56962	1.42005	1.05477	LotjaGi6g1v0254900	Bet v1-like
Lj2g3v1389210	1.72818	2.26178	2.68464	LotjaGi1g1v0586300	Glycoside hydrolase
Lj1g3v2141040	1.09205	1.19623	1.63474	NA	NA
Lj0g3v0185839	4.69095	5.41235	3.5612	NA	NA
Lj6g3v0437160	3.14908	3.33669	3.3105	LotjaGi6g1v0058300	RNI-like
Lj2g3v1172600	1.71309	1.57167	2.75855	LotjaGi2g1v0282600	NA
Lj1g3v4446840	1.60854	1.97516	2.36693	LotjaGi1g1v0716800	Plant lipid
Lj5g3v0998780	1.60854	1.97516	2.36693	LotjaGi1g1v0716800	Plant lipid
Lj0g3v0248379	0.972246	1.01585	0.666887	LotjaGi1g1v0565300	Domain of unknown function DUF4408
Lj1g3v2372260	6.52817	6.89639	6.93018	LotjaGi1g1v0443500	NA
Lj0g3v0114929	1.63557	1.29588	0.997078	LotjaGi1g1v0445400	NA
Lj3g3v1487200	3.06091	3.67198	4.59946	LotjaGi3g1v0300200	Oxoglutarate/iron-dependent dioxygenase
Lj4g3v0071120	2.07394	1.86227	1.98522	LotjaGi6g1v0277200	Protein kinase-like (PK-like)
Lj6g3v1693070	2.07394	1.86227	1.98522	LotjaGi6g1v0277200	Protein kinase
Lj0g3v0185819	3.27143	3.30925	2.6964	NA	NA
Lj1g3v2068760	1.69407	1.52386	1.53136	LotjaGi1g1v0405500	Dioxygenase RAMOSUS1
Lj6g3v1226260	3.4763	4.09087	5.15196	LotjaGi6g1v0229600	peroxidase
Lj2g3v2904650	1.40285	1.02211	1.24154	NA	NA
Lj0g3v0041769	1.26193	1.08676	1.31113	NA	NA
Lj3g3v2314160	0.8653	0.580996	0.611512	NA	NA
Lj1g3v2314220	0.82981	0.83776	0.805514	LotjaGi1g1v0439600	NA
Lj6g3v0777190	0.88038	0.728238	1.23323	LotjaGi6g1v0146900	Cytochrome P450
Lj0g3v0107279	1.12833	1.26621	1.57775	LotjaGi3g1v0169000	NA
Lj2g3v1851410	2.25549	2.4252	2.85634	LotjaGi2g1v0400000	Patatin/Phospholipase A2-related
Lj0g3v0341279	0.636521	0.786882	0.818733	NA	NA
Lj3g3v1293360	1.42408	1.98864	2.61482	LotjaGi3g1v0183200	NA
Lj4g3v2603920	1.27902	0.848265	1.0265	LotjaGi4g1v0374600	NA
Lj1g3v4024010	1.06083	0.902576	0.624851	LotjaGi1g1v0651600	NA
Lj0g3v0202299	3.34072	3.21121	4.54851	LotjaGi1g1v0667100	ACHAETE-SCUTE COMPLEX PROTEIN T5
Lj5g3v1176750	1.84152	1.88182	2.29787	NA	NA
Lj0g3v0196679	2.31966	3.70297	3.43009	LotjaGi1g1v0362200	NA
Lj4g3v2400530	2.01475	2.24688	2.49775	LotjaGi4g1v0351300	Adenylate isopentenyl
Lj3g3v1403970	3.06176	2.62731	2.74373	LotjaGi3g1v0202900	NA
Lj0g3v0362669	1.13787	0.984818	1.00488	LotjaGi6g1v0165700	Cytochrome P450 monooxygenase
Lj4g3v2020320	2.79216	2.26113	3.20143	LotjaGi4g1v0292900	NA
Lj0g3v0065089	1.58193	1.80379	2.3653	LotjaGi6g1v0001200	3-ketoacyl-CoA synthase
Lj0g3v0211849	3.03418	2.59748	3.15701	NA	NA
Lj0g3v0105729	1.76399	1.41908	1.53237	LotjaGi3g1v0486000	Peptidase S10
Lj0g3v0059359	2.4486	2.98408	4.17863	LotjaGi4g1v0123100	NA
Lj4g3v2800450	0.721814	0.856845	1.52517	LotjaGi4g1v0402000	Cytochrome P450
Lj3g3v1113460	1.07245	1.2258	1.54707	LotjaGi3g1v0169000	HLH
Lj3g3v1309560	1.48365	1.51804	2.04533	LotjaGi3g1v0189100	Cytochrome P450
Lj1g3v3729230	0.954742	0.8051	0.673501	LotjaGi1g1v0616000	NA
Lj0g3v0119759	2.18114	2.21232	2.18583	NA	NA
Lj0g3v0132879	2.06727	2.53049	2.79612	LotjaGi1g1v0122400	Cytochrome P450
Lj1g3v4480250	0.804155	1.10336	1.21059	LotjaGi1g1v0712200	Cytochrome P450
Lj0g3v0271169	2.59633	2.97134	3.3839	LotjaGi4g1v0050900	Salt-sensitive 3'-phosphoadenosine-5'-phosphatase HAL2/SAL1 (ISS)
Lj0g3v0055379	0.67764	0.713691	0.75885	LotjaGi1g1v0557200	NA
Lj1g3v3330260	0.67764	0.713691	0.75885	LotjaGi1g1v0557200	MLO-like protein
Lj0g3v0151659	0.846836	0.933124	0.991047	LotjaGi1g1v0382500	NA
Lj6g3v0030050	3.05225	3.22323	3.85211	LotjaGi6g1v0005700	NA
Lj4g3v3001240	0.604432	0.651592	0.738374	LotjaGi4g1v0430800	Putative respiratory burst oxidase-like protein
Lj2g3v3245740	1.01019	1.02009	1.31518	LotjaGi1g1v0020900	MAP kinase-like protein
Lj2g3v2171910	0.969503	0.976697	1.21997	LotjaGi1g1v0130900	alpha/beta-Hydrolases
Lj5g3v2057460	1.23373	1.54451	1.48203	NA	GAG/POL/ENV POLYPROTEIN
Lj0g3v0064149	1.2534	1.14879	1.67426	NA	NA
Lj0g3v0238109	1.87674	1.88816	2.3303	NA	NA
Lj0g3v0204039	1.80602	1.80624	1.88619	NA	NA
Lj3g3v2246950	1.07974	0.861826	0.800744	LotjaGi3g1v0416200	Flavonol synthase/flavanone 3-hydroxylase
Lj1g3v3729240	0.955926	0.827311	0.709136	LotjaGi1g1v0616000	NA
Lj0g3v0272889	0.862228	1.22163	1.16901	LotjaGi2g1v0211100	Cytochrome P450
Lj4g3v0449990	2.70769	3.08856	3.44532	LotjaGi4g1v0050900	Inositol monophosphatase
Lj2g3v2171920	0.970997	0.981877	1.21818	LotjaGi1g1v0130900	alpha/beta-Hydrolases
Lj3g3v3430300	1.15733	1.11268	1.2609	LotjaGi3g1v0098500	Protein kinase-like
Lj1g3v0112650	1.79994	1.89946	2.21182	LotjaGi5g1v0311200	Systemin receptor SR160
Lj5g3v2045520	1.79994	1.89946	2.21182	LotjaGi5g1v0311200	Systemin receptor SR160
Lj0g3v0266779	1.57515	1.38148	1.46646	LotjaGi3g1v0373700	Malectin_like
Lj4g3v0548730	0.601989	0.660235	0.956266	LotjaGi3g1v0158100	NA
Lj6g3v1901350	2.12739	2.71913	1.65537	NA	NA
Lj1g3v1788000	1.83196	1.84812	1.57983	NA	NA
Lj0g3v0205579	2.56148	2.19225	2.56125	LotjaGi3g1v0292200	NA
Lj5g3v0155490	1.19765	1.58378	1.93393	LotjaGi5g1v0010600	Glycine max GN=Gma.43078 PE,63.4,0,put_zinc_LRP1: putative zinc finger domain, LRP1 t,Zinc finger, lateral root primordium type 1; LRP1,CUFF.52612.1
Lj0g3v0276279	0.590597	0.85845	0.721027	NA	NA
Lj0g3v0201489	1.27314	1.00701	0.829951	LotjaGi4g1v0162000	NA
Lj0g3v0348919	0.596375	0.654373	0.692243	LotjaGi1g1v0032700	ACID PHOSPHATASE RELATED
Lj0g3v0216469	1.46869	1.66657	1.93753	LotjaGi6g1v0255000	Bet v1-like
Lj1g3v2896180	2.05147	1.66793	2.35401	LotjaGi1g1v0490900	GLUCOSYL/GLUCURONOSYL TRANSFERASES
Lj1g3v1615310	2.649	3.33739	3.98891	LotjaGi1g1v0349800	Cytochrome P450
Lj0g3v0092009	1.18895	1.18102	1.27382	LotjaGi3g1v0476000	AMP-dependent synthetase and ligase
Lj6g3v1914560	1.12681	1.03142	0.968849	LotjaGi6g1v0258000	DELLA protein RGL2
Lj1g3v1615300	2.64585	3.3342	3.9865	LotjaGi1g1v0349800	Cytochrome P450
Lj0g3v0086199	1.02701	0.776855	0.783202	LotjaGi3g1v0361000	Oxoglutarate/iron-dependent dioxygenase
Lj3g3v3200890	1.87833	1.53057	1.07292	LotjaGi2g1v0373600	Protein kinase
Lj0g3v0220469	1.59704	1.80019	2.31099	LotjaGi2g1v0116200	Putative methyl
Lj4g3v0398310	2.13893	2.23681	1.8256	LotjaGi4g1v0041100	Lectin receptor-like kinase Tg-20
Lj0g3v0272879	0.851688	1.21978	1.17014	LotjaGi2g1v0211100	Cytochrome P450
Lj1g3v2623740	1.82306	1.86988	2.09521	LotjaGi1g1v0469300	AP2/ERF
Lj4g3v2799410	1.61913	1.21763	1.0286	LotjaGi4g1v0402200	NA
Lj5g3v1212600	1.47141	1.80844	2.21185	LotjaGi5g1v0196200	S-adenosyl-L-methionine-dependent methyl
Lj0g3v0283269	1.84202	1.98266	2.23121	NA	NA
Lj1g3v4315340	1.4437	1.60156	1.95745	LotjaGi1g1v0724300	NA
Lj3g3v2318370	1.20437	1.53549	1.79681	LotjaGi3g1v0372700	NA
Lj0g3v0134279	3.93617	4.38224	4.77975	LotjaGi1g1v0377000	Legume lectin
Lj1g3v2896160	1.28495	1.18939	1.68807	LotjaGi1g1v0490900	NA
Lj0g3v0202679	0.788944	0.812807	0.793222	LotjaGi1g1v0098500	NA
Lj0g3v0185809	3.65212	2.96677	2.92965	NA	NA
Lj4g3v2800440	0.711563	0.836889	1.51372	LotjaGi4g1v0402000	Cytochrome P450
Lj0g3v0205569	2.48224	1.99548	2.34601	LotjaGi3g1v0292200	Bifunctional protein aas
Lj4g3v2618640	3.29967	2.88824	3.59832	LotjaGi4g1v0381700	NA
Lj3g3v1011040	3.96039	3.74444	3.82356	NA	NA
Lj2g3v2002950	2.65589	2.9253	3.83229	LotjaGi2g1v0429400	Anthocyanidin synthase
Lj0g3v0238849	1.09388	1.01737	1.24944	NA	NA
Lj4g3v1287330	2.65591	2.92528	3.83228	LotjaGi2g1v0429400	Anthocyanidin synthase
Lj5g3v1603470	1.64275	1.19082	1.66396	NA	NA
Lj0g3v0158089	1.87911	1.67111	1.17565	LotjaGi1g1v0491300	UDP-Glycosyl
Lj0g3v0302629	1.87911	1.67111	1.17565	LotjaGi1g1v0491300	UDP-Glycosyl
Lj5g3v1425430	0.771772	0.775377	0.595391	LotjaGi5g1v0215200	Cysteine synthase
Lj0g3v0161889	1.13654	1.09879	1.10874	LotjaGi5g1v0249200	Amine oxidase
Lj0g3v0020279	0.628243	0.68912	0.735368	LotjaGi0g1v0001500	ACT domain-containing protein (ISS)
Lj0g3v0085889	1.28634	1.25762	0.924976	LotjaGi5g1v0047300	HSP20
Lj1g3v0116420	0.915754	0.991008	1.15545	LotjaGi2g1v0452600	NA
Lj6g3v2134270	0.734746	0.936773	1.03829	LotjaGi6g1v0344000	DUF538
Lj0g3v0102229	1.41541	1.66988	2.16638	LotjaGi6g1v0111000	Cytochrome P450
Lj1g3v5060650	2.39825	2.344	2.48187	NA	NA
Lj0g3v0130599	0.81806	1.06397	1.45828	LotjaGi3g1v0401500	NA
Lj5g3v1015810	1.00524	1.05201	1.25189	LotjaGi5g1v0175800	NA
Lj0g3v0173579	1.01898	1.01625	1.14376	LotjaGi2g1v0010800	Acetyl-CoA synthetase-like
Lj3g3v0652730	5.91864	7.00072	8.04817	LotjaGi3g1v0076200	,Clavaminate synthase-like
Lj1g3v3930420	1.89582	1.85668	1.92408	LotjaGi1g1v0636100	AP2/ERF domain
Lj4g3v3003850	1.08841	1.04637	0.806269	LotjaGi4g1v0434800	ENDO-1,4-BETA-GLUCANASE
Lj6g3v1513750	1.59707	1.40531	1.04853	NA	NA
Lj0g3v0357699	0.938513	1.06839	1.23718	LotjaGi1g1v0712200	Cytochrome P450
Lj5g3v0670540	2.25356	2.3789	2.87092	LotjaGi5g1v0084500	Alpha carbonic anhydrase
Lj4g3v2977940	2.03889	2.23718	2.03048	NA	NA
Lj0g3v0270669	0.754105	1.03165	1.38744	NA	NA
Lj0g3v0288099	0.857918	0.985838	0.75672	LotjaGi2g1v0152600	alpha/beta-Hydrolases
Lj0g3v0077879	2.96583	3.2066	2.87215	NA	NA
Lj2g3v1455010	0.757684	0.648781	0.719595	LotjaGi2g1v0327600	NA
Lj4g3v0496650	6.27069	6.21642	7.99205	NA	NA
Lj2g3v2222900	1.06783	0.699492	0.790829	LotjaGi1g1v0124800	Protein kinase
Lj0g3v0199239	1.72741	1.99286	2.18233	LotjaGi3g1v0374200	Domain of unknown function DUF547
Lj3g3v1147060	6.36681	7.54544	8.15507	LotjaGi3g1v0175200	NAD-binding
Lj4g3v3113850	1.49433	1.7442	1.36257	LotjaGi4g1v0460000	NA
Lj5g3v2063130	4.0251	4.6041	4.85394	NA	Transcription factor, MADS-box
Lj0g3v0265759	1.20271	1.10552	1.58291	LotjaGi6g1v0317100	Rhodanese-like domain
Lj1g3v1514790	2.00563	2.22909	2.61671	LotjaGi1g1v0339800	DUF246 domain-containing protein
Lj0g3v0288089	0.85792	0.973967	0.756722	LotjaGi2g1v0152600	CARBOXYLESTERASE-RELATED
Lj6g3v1967000	1.20525	1.14745	1.58468	LotjaGi6g1v0317000	NA
Lj1g3v3975310	1.13201	0.939257	0.920522	LotjaGi1g1v0643700	AP2/ERF
Lj5g3v1238820	1.75842	1.63073	1.14903	LotjaGi5g1v0199400	Aluminum-activated malate
Lj2g3v0039140	2.92485	3.50654	3.92568	NA	NA
Lj1g3v4575250	0.773584	0.852471	1.12196	NA	NA
Lj3g3v1061390	0.700206	0.713735	1.05874	LotjaGi3g1v0158100	NA
Lj1g3v4575260	0.773837	0.85253	1.12425	NA	Conserved hypothetical protein CHP01589
Lj2g3v1034440	3.30721	3.60159	3.92642	NA	NA
Lj4g3v0643720	1.52061	2.22819	2.9309	NA	Cycas taitungensis
Lj1g3v3846910	1.58301	1.53232	1.85466	NA	NA
Lj4g3v3114580	1.90334	2.00831	2.68839	LotjaGi4g1v0462700	NA
Lj0g3v0343399	1.69823	1.5611	1.92778	NA	NA
Lj4g3v1881910	3.02095	2.85406	3.15669	LotjaGi1g1v0165900	Na+/H+ antiporter nha1
Lj4g3v0548720	0.606171	0.580723	0.895627	NA	NA
Lj1g3v4047410	1.04031	0.853554	1.02302	LotjaGi3g1v0488900	LysM type receptor kinase
Lj3g3v3082380	1.04031	0.853554	1.02302	LotjaGi3g1v0488900	LysM type receptor kinase
Lj3g3v1313780	1.20668	1.30157	1.43185	LotjaGi3g1v0187300	Mitogen-activated protein kinase kinase kinase A
Lj0g3v0064839	1.18445	1.34377	1.28627	LotjaGi6g1v0131000	Ankyrin repeat
Lj6g3v1966990	1.22945	1.17309	1.62225	LotjaGi6g1v0317100	Rhodanese
Lj2g3v2701310	1.27421	1.47578	2.10131	LotjaGi1g1v0080500	NA
Lj1g3v3767250	3.3406	4.34797	4.96515	LotjaGi1g1v0164700	Protein kinase
Lj5g3v1988770	2.38081	3.2841	4.00116	LotjaGi5g1v0297000	NAD binding
Lj0g3v0271809	1.25338	1.10333	1.01612	LotjaGi1g1v0102400	BACTERIOCHLOROPHYLL SYNTHASE
Lj0g3v0099689	1.77404	1.6487	1.23009	LotjaGi5g1v0199400	Aluminum-activated malate
Lj0g3v0275609	0.87734	0.878646	0.651835	LotjaGi4g1v0184600	Proton-dependent oligopeptide
Lj2g3v3133580	1.85114	1.8491	2.22809	NA	NA
Lj0g3v0041099	1.89682	1.44283	1.33844	LotjaGi2g1v0005600	NA
Lj0g3v0334489	0.722699	0.758101	0.951488	LotjaGi3g1v0401300	Rac GTPase activating protein (Fragment)
Lj5g3v0711180	1.34246	1.63692	2.47436	LotjaGi5g1v0091900	Fructose-bisphosphate aldolase
Lj0g3v0201259	0.908497	0.990233	1.38648	LotjaGi5g1v0143400	TGA10
Lj2g3v3260140	2.37044	2.27875	2.43035	NA	NA
Lj3g3v3430270	1.42056	1.2089	1.57676	NA	NA
Lj0g3v0306819	1.24011	1.50736	1.91857	LotjaGi5g1v0111600	NA
Lj3g3v1476930	0.886544	1.20991	1.20873	LotjaGi1g1v0603500	Auxin responsive SAUR protein
Lj3g3v3700190	1.01389	0.997359	1.37314	LotjaGi3g1v0551100	MoCo carrier protein-like
Lj2g3v1252640	3.46716	3.21025	3.53525	LotjaGi2g1v0294800	Ureide permease 5
Lj4g3v0423090	1.66089	1.97394	2.72965	LotjaGi4g1v0045700	NAD(P)-binding Rossmann-fold domains
Lj3g3v2096020	0.792376	0.870914	0.634596	LotjaGi5g1v0215200	Tryptophan synthase beta subunit-like PLP-dependent enzymes
Lj0g3v0066429	0.721677	0.605426	0.765283	LotjaGi2g1v0017700	Transaldolase
Lj0g3v0343429	0.808952	0.635458	0.909398	LotjaGi1g1v0033100	Cc-nbs-lrr resistance protein
Lj3g3v2720390	1.89538	2.00839	1.59403	NA	NA
Lj0g3v0041789	0.97934	0.780001	1.09466	NA	Protein kinase
Lj0g3v0041749	1.16727	1.06198	1.22108	NA	NA
Lj3g3v1476940	1.04325	1.15887	1.2102	LotjaGi1g1v0603600	NA
Lj4g3v3113860	1.49403	1.72734	1.33059	LotjaGi4g1v0460000	NA
Lj2g3v1549980	0.932958	1.13775	1.01978	LotjaGi2g1v0344900	Galactose oxidase, beta-propeller
Lj2g3v0039130	3.40965	3.97339	4.70452	NA	NA
Lj6g3v1334380	0.864982	0.813028	0.73984	LotjaGi6g1v0236600	NA
Lj0g3v0251229	1.08952	1.08383	1.24482	LotjaGi2g1v0010800	AMP-binding
Lj0g3v0070749	1.50759	1.21821	1.17775	LotjaGi3g1v0329000	Pectinesterase inhibitor
Lj1g3v4764250	2.54632	2.40376	2.98355	NA	NA
Lj5g3v0626860	2.24268	2.33801	2.31772	NA	NA
Lj5g3v2265240	3.92338	4.68596	4.40885	LotjaGi5g1v0356700	rotein of unknown function DUF966
Lj1g3v4763590	4.3504	4.25198	4.76767	NA	Amidohydrolase
Lj3g3v1981240	1.59214	1.52221	2.03999	NA	GRF zinc finger-containing protein-like protein (Fragment)
Lj0g3v0344009	1.54298	1.78573	2.12777	LotjaGi3g1v0353300	Protein of unknown function DUF247
Lj0g3v0215119	3.54708	3.42037	4.0721	NA	Pathogenesis-related protein 1
Lj0g3v0128379	0.735579	0.880015	1.01863	LotjaGi1g1v0599200	AP2/ERF domain
Lj0g3v0157079	1.74148	2.06282	2.27681	LotjaGi6g1v0194500	DISEASE RESISTANCE PROTEIN (TIR-NBS-LRR CLASS)
Lj2g3v0934070	0.842579	0.861276	1.09035	LotjaGi2g1v0242300	NA
Lj0g3v0232609	3.25988	3.73179	4.49739	LotjaGi3g1v0132000	NA
Lj0g3v0289579	2.43551	2.2907	2.77989	LotjaGi2g1v0412000	bZIP
Lj2g3v1536150	3.0562	3.74858	5.07906	LotjaGi2g1v0340200	NA
Lj2g3v1349290	1.21676	1.14699	1.1518	LotjaGi1g1v0330200	GRF zinc finger containing protein
Lj0g3v0342079	1.64841	1.51744	1.96903	LotjaGi4g1v0342400	C2 calcium/lipid-binding domain
Lj1g3v3381280	1.51131	1.15048	0.948562	NA	NA
Lj2g3v1989130	0.992456	1.19699	1.21827	LotjaGi2g1v0420200	alpha/beta-Hydrolases
Lj2g3v1989140	0.992456	1.19642	1.21827	LotjaGi2g1v0420200	alpha/beta-Hydrolases
Lj0g3v0042179	1.22296	0.824293	1.03086	NA	NA
Lj0g3v0314399	1.18878	1.08364	1.20453	NA	NA
Lj3g3v2664360	0.959044	0.978967	0.95582	LotjaGi3g1v0421000	Protein of unknown function DUF3511
Lj2g3v1985160	2.7077	2.09992	1.88539	NA	NA
Lj6g3v2217060	0.68471	1.37523	1.39345	NA	NA
Lj1g3v3902460	2.47642	3.1295	3.65562	NA	NA
Lj0g3v0241879	0.896088	0.915862	0.993711	LotjaGi5g1v0286800	30S ribosomal protein S1
Lj0g3v0256619	3.16274	3.86673	4.41689	LotjaGi3g1v0129500	NA
Lj1g3v4717340	1.1905	1.29926	1.49569	LotjaGi1g1v0675600	NA
Lj1g3v3641910	0.751874	0.704559	0.732677	LotjaGi1g1v0607600	Protein of unknown function DUF1645
Lj2g3v2365850	1.41599	2.18045	0.967533	NA	Wound-induced protein
Lj0g3v0276839	1.69597	1.30088	1.39691	LotjaGi6g1v0151000	PLC-like phosphodiesterase
Lj6g3v1812100	1.85624	1.65693	2.33529	NA	LysM type receptor kinase
Lj3g3v2316670	0.871643	0.645933	0.818708	LotjaGi1g1v0698900	UNC93 homolog A , related
Lj4g3v0137760	2.48946	2.49688	3.04828	LotjaGi4g1v0012400	NA
Lj1g3v1979410	0.940582	0.785978	0.860668	NA	NA
Lj0g3v0205559	2.34833	1.83218	2.12546	LotjaGi3g1v0292200	Bifunctional protein aas
Lj4g3v0633620	0.746979	0.913464	1.09371	LotjaGi4g1v0078900	NA
Lj3g3v0510910	0.833587	0.764265	0.897149	LotjaGi3g1v0063800	TRAF domain-like
Lj3g3v3086070	1.45751	1.15345	1.13405	LotjaGi2g1v0361100	Beta-galactosidase
Lj3g3v3155120	1.14902	1.30947	1.34901	LotjaGi2g1v0368900	Protein-tyrosine phosphatase-like
Lj0g3v0121339	0.753214	0.918815	1.09696	LotjaGi4g1v0078900	NA
Lj1g3v1787650	1.34616	2.06646	3.05438	LotjaGi1g1v0369200	HSP20-like chaperone
Lj2g3v2001750	2.77444	2.08642	2.66539	NA	Putative gag/pol polyprotein
Lj4g3v1273440	2.77444	2.08642	2.66539	NA	Putative gag/pol polyprotein
Lj2g3v2412460	0.716747	0.737857	0.841855	LotjaGi1g1v0108400	Zinc finger, RING/FYVE/PHD-type
Lj0g3v0140769	1.46887	1.47746	2.06772	LotjaGi6g1v0094600	DISEASE RESISTANCE PROTEIN (TIR-NBS-LRR CLASS)
Lj4g3v2139960	1.50999	1.44551	1.3935	LotjaGi2g1v0341900	NA
Lj6g3v0920050	0.598167	0.68518	0.672057	LotjaGi6g1v0165500	Cytochrome P450 monooxygenase
Lj1g3v1525930	0.694394	0.683096	0.686866	LotjaGi1g1v0340900	HLH
Lj4g3v3113960	3.70949	3.66615	4.14749	LotjaGi4g1v0460500	NA
Lj3g3v2812200	0.746672	1.06389	0.905722	LotjaGi3g1v0447100	NA
Lj3g3v3155110	1.20537	1.38627	1.44585	LotjaGi2g1v0369000	Aquaporin-like
Lj1g3v4997280	0.733837	0.796921	0.753249	LotjaGi4g1v0362700	Clavaminate synthase-like
Lj2g3v2195520	0.863587	1.02087	1.50288	LotjaGi1g1v0127700	DNA mismatch repair protein MutS
Lj1g3v0112680	0.672217	0.832249	1.14695	LotjaGi5g1v0310900	Auxin_canalis
Lj0g3v0348509	0.716784	0.863069	1.22769	LotjaGi6g1v0255000	Bet v1-like
Lj1g3v4551230	0.748852	0.917128	1.00662	LotjaGi1g1v0699300	K(+)/H(+) antiporter
Lj1g3v2809230	3.41635	3.15355	2.97573	LotjaGi1g1v0484100	Auxin Efflux Carrier
Lj4g3v0668200	0.829462	0.892451	0.701301	LotjaGi4g1v0086000	LOB domain-containing protein
Lj1g3v2896190	1.96365	1.53779	2.12699	LotjaGi1g1v0490900	UDP-GLUCOSYLTRANSFERASE
Lj4g3v1635550	1.53654	1.78097	2.01431	LotjaGi4g1v0249800	ZINC FINGER FYVE DOMAIN CONTAINING PROTEIN
Lj2g3v0582820	0.983473	1.00193	1.34859	LotjaGi2g1v0175200	NBS-containing resistance-like protein
Lj0g3v0002899	1.06521	1.04933	1.18242	LotjaGi2g1v0010800	Acetyl-CoA synthetase-like
Lj0g3v0314389	1.08723	1.05997	1.20516	LotjaGi1g1v0164800	Protein kinase
Lj6g3v0029990	1.90708	1.98172	2.9521	LotjaGi6g1v0005500	NA
Lj0g3v0313429	0.724194	1.08204	0.990346	LotjaGi2g1v0367600	EXOCYST COMPLEX PROTEIN EXO70
Lj4g3v1428550	1.98928	2.16204	2.49508	LotjaGi4g1v0228800	Zinc/iron permease
Lj3g3v0512990	1.2435	1.05206	1.2568	LotjaGi3g1v0064900	Protein of unknown function DUF247
Lj3g3v0513000	1.2435	1.05206	1.2568	LotjaGi3g1v0064900	Protein of unknown function DUF247
Lj5g3v0067690	0.774335	1.09553	0.964929	LotjaGi5g1v0023100	Nbs-lrr resistance protein
Lj1g3v4691550	2.72669	2.67268	3.15575	LotjaGi1g1v0683800	2OG-FE(II) OXYGENASE FAMILY PROTEIN
Lj0g3v0246969	2.33176	2.19033	2.04834	LotjaGi2g1v0289000	2OG-FE(II) OXYGENASE FAMILY PROTEIN
Lj3g3v2575890	1.18729	1.23207	1.53859	NA	NA
Lj0g3v0073129	1.5157	1.82878	1.56889	LotjaGi1g1v0404500	9-CIS-EPOXYCAROTENOID DIOXYGENASE
Lj1g3v4548980	2.48329	2.06419	2.79259	NA	Ankyrin repeat
Lj4g3v1635560	1.48016	1.72421	1.95595	LotjaGi4g1v0249800	NA
Lj5g3v0265880	1.25713	1.45845	1.71295	LotjaGi5g1v0002400	Peptidase S9A
Lj0g3v0291079	0.711002	1.0005	1.35727	LotjaGi1g1v0538900	Heat shock protein 70
Lj3g3v3430260	1.70484	1.5119	2.01867	NA	NA
Lj2g3v3245750	0.947867	1.00787	1.2805	LotjaGi1g1v0020900	Serine/Threonine protein kinases
Lj5g3v1759380	0.81976	1.48343	1.8391	NA	NA
Lj0g3v0352129	1.24697	1.30195	1.71783	LotjaGi1g1v0733200	Plant disease resistance response protein; NUCLEOPORIN-RELATED,NULL,CUFF.24218.1
Lj4g3v0073790	0.708316	0.99071	1.07219	NA	NA
Lj6g3v1693820	0.708316	0.99071	1.07219	NA	NA
Lj2g3v1744980	3.51058	3.98455	5.06759	NA	Myb domain
Lj1g3v3053640	6.71695	6.61179	6.89137	LotjaGi1g1v0517300	NA
Lj2g3v2772320	0.746573	0.812712	0.741537	LotjaGi1g1v0075300	NA
Lj0g3v0305019	1.62991	2.02973	1.84607	LotjaGi1g1v0049600	DUF4228
Lj0g3v0059579	1.55357	1.72497	1.47197	LotjaGi2g1v0341900	NA
Lj0g3v0297679	1.34994	1.18679	0.979116	LotjaGi5g1v0087000	Kinase-like protein
Lj3g3v2210350	1.31762	1.01577	0.90241	NA	NA
Lj4g3v0000050	1.60468	1.7473	2.08855	NA	NA
Lj0g3v0110619	1.36162	1.10741	1.09704	NA	NA
Lj0g3v0088989	0.831755	1.18337	1.3611	LotjaGi1g1v0122100	UDP-glucuronosyl/UDP-glucosyl
Lj5g3v1414150	2.33126	2.91523	3.52064	LotjaGi5g1v0213400	NA
Lj0g3v0256519	1.36836	1.58163	1.50516	NA	WRKY
Lj4g3v1683220	5.36819	6.36743	6.74082	LotjaGi4g1v0252600	FAD/NAD(P)-binding
Lj0g3v0071839	1.17669	1.42372	1.71963	LotjaGi2g1v0021100	Cytochrome P450
Lj0g3v0199589	1.6047	1.74732	2.06725	LotjaGi3g1v0173900	Zinc finger, GRF-type
Lj5g3v2045490	0.672503	0.858303	1.15079	LotjaGi5g1v0310900	Domain of unknown function DUF828
Lj0g3v0248549	0.659562	0.614757	0.760566	LotjaGi1g1v0541400	Clavaminate synthase-like
Lj3g3v2330900	1.22768	0.921733	1.53365	LotjaGi3g1v0383900	Protein kinase
Lj2g3v1022820	0.916719	1.28612	1.48306	NA	NA
Lj0g3v0128909	2.47252	2.27377	2.61816	LotjaGi6g1v0256000	NA
Lj1g3v2822790	1.09337	1.34204	1.01272	NA	NA
Lj0g3v0335089	1.54989	1.35881	1.42624	LotjaGi1g1v0405500	BETA-CAROTENE DIOXYGENASE
Lj0g3v0068959	1.64401	1.88315	2.06192	NA	NA
Lj2g3v3339140	1.25545	2.73581	2.91063	LotjaGi2g1v0191200	NA
Lj4g3v0961100	1.63157	2.48716	3.11827	NA	Cycas taitungensis
Lj0g3v0050189	1.15402	1.18061	0.924298	LotjaGi4g1v0415300	NA
Lj0g3v0213009	1.20399	1.32344	1.22816	LotjaGi6g1v0257600	Glycoside hydrolase
Lj3g3v2441830	0.871766	0.90345	1.31452	NA	PROTEIN BINDING / ZINC ION BINDING
Lj0g3v0342089	0.837291	1.26369	1.33686	LotjaGi4g1v0342300	NA
Lj4g3v2401150	4.17565	3.76998	4.56694	LotjaGi4g1v0354800	2OG-FE(II) OXYGENASE FAMILY PROTEIN
Lj3g3v2247040	3.05619	2.38085	3.07537	LotjaGi3g1v0361200	2OG-FE(II) OXYGENASE FAMILY PROTEIN
Lj0g3v0202539	1.03328	1.20196	1.13947	LotjaGi6g1v0257600	Glucan-endo-1,3-beta-glucosidase (Precursor)
Lj0g3v0188889	2.61346	2.66607	3.59758	LotjaGi6g1v0147700	Cytochrome P450
Lj3g3v2310010	1.78187	1.7106	1.82917	NA	Reverse
Lj4g3v2641090	0.800444	1.06899	1.21559	LotjaGi4g1v0384400	NA
Lj4g3v2846330	1.10779	1.19661	0.912551	LotjaGi4g1v0415300	NA
Lj3g3v1993870	0.919551	1.031	0.942678	NA	NA
Lj0g3v0092169	0.757252	0.825505	1.0504	LotjaGi2g1v0110900	Cation/calcium exchanger
Lj3g3v3430180	0.805659	0.991217	1.2286	LotjaGi3g1v0099200	U-box domain-containing protein
Lj1g3v4753220	1.52773	1.94814	1.82233	LotjaGi1g1v0740500	NA
Lj1g3v1798710	1.58779	1.87641	2.08862	LotjaGi1g1v0373800	ATPase
Lj0g3v0204029	0.84597	0.90653	0.926428	LotjaGi5g1v0105900	NA
Lj3g3v0821100	1.3897	1.76412	2.58041	LotjaGi3g1v0116600	Xanthine/uracil/vitamin C permease
Lj6g3v1028710	1.19768	1.32299	1.50231	NA	NA
Lj4g3v3004080	0.694975	0.856208	0.75299	LotjaGi4g1v0435600	Wall-associated receptor kinase galacturonan-binding domain
Lj6g3v0291910	1.03872	1.21178	1.43841	LotjaGi6g1v0041300	EXOSTOSIN FAMILY PROTEIN
Lj3g3v1933030	1.44825	1.05242	1.46803	NA	NA
Lj2g3v2001440	0.797511	1.0203	1.17636	LotjaGi2g1v0421900	NA
Lj1g3v0627590	2.81396	4.29252	4.31054	LotjaGi1g1v0245300	PLAC8
Lj0g3v0041829	1.14969	1.27506	1.11568	NA	NA
Lj0g3v0207429	1.97552	2.43526	2.41643	NA	NA
Lj1g3v1648950	2.93862	3.11521	3.89983	LotjaGi1g1v0353500	Patatin-like protein
Lj3g3v1983610	0.878489	1.04155	0.931829	LotjaGi3g1v0338600	NA
Lj5g3v1015360	0.715076	0.779868	0.762184	LotjaGi5g1v0175000	Lipase
Lj5g3v2029680	1.38224	1.45207	1.37338	LotjaGi2g1v0341900	NA
Lj1g3v2977110	0.606413	0.885558	0.771504	NA	NA
Lj0g3v0041839	1.21799	1.18542	1.21846	NA	NA
Lj1g3v4918590	3.17577	4.45997	4.16132	LotjaGi1g1v0769000	F-box domain, cyclin-like
Lj0g3v0010149	6.99664	8.5336	9.36306	LotjaGi4g1v0288300	Early nodulin Enod5 (Precursor)
Lj0g3v0038979	0.963799	0.977839	0.808397	LotjaGi2g1v0102800	MLO-like protein
Lj3g3v2995750	0.797877	1.09981	1.11601	LotjaGi3g1v0479000	NAD-binding
Lj2g3v1414850	0.877394	1.00463	0.737476	LotjaGi2g1v0320700	Serine/threonine-protein kinase
Lj1g3v4753180	0.658676	0.775363	0.955708	NA	NA
Lj0g3v0130239	0.86161	1.23607	1.66817	NA	Protein of unknown function DUF1645
Lj5g3v1914110	0.797405	0.971567	0.993896	LotjaGi5g1v0287700	GIGANTEA
Lj1g3v4691730	0.77447	0.868556	1.04428	LotjaGi1g1v0682600	NA
Lj0g3v0163629	3.67678	3.85348	4.58969	NA	NA
Lj0g3v0088599	1.31056	1.07212	1.11193	NA	NA
Lj4g3v2215220	2.34439	1.99579	1.91124	NA	NA
Lj2g3v2532270	1.62521	1.90219	2.3529	LotjaGi1g1v0099000	NA
Lj0g3v0066019	4.26601	4.55204	5.45845	NA	Glutaredoxin
Lj2g3v1241200	1.71305	2.43098	2.31557	LotjaGi2g1v0292500	Cytochrome P450
Lj5g3v0681220	1.00698	1.27721	1.84489	LotjaGi5g1v0086800	Naringenin,2-oxoglutarate 3-dioxygenase
Lj3g3v0895900	1.5216	2.30412	2.66062	NA	NA
Lj3g3v0895910	1.5216	2.30412	2.66062	NA	NA
Lj4g3v0548740	0.691412	0.712707	1.00008	NA	NA
Lj0g3v0041809	1.14816	1.33787	1.28886	NA	NA
Lj0g3v0132529	0.796173	1.0421	1.1342	LotjaGi6g1v0123300	Myrosinase-binding protein-like protein
Lj0g3v0229079	0.768049	0.979051	1.223	NA	DUF640
Lj0g3v0144959	1.30625	1.11092	1.58147	NA	NA
Lj3g3v1993790	2.78458	3.2037	4.00575	NA	NA
Lj3g3v3338470	0.99593	0.974376	1.14642	LotjaGi3g1v0506900	NA
Lj0g3v0175259	1.16854	0.998886	1.44738	NA	NA
Lj1g3v4955400	3.35514	2.79695	4.04964	NA	NA
Lj0g3v0253359	0.724155	0.660783	0.864766	LotjaGi5g1v0072700	NA
Lj0g3v0290119	0.95065	1.58344	2.23824	LotjaGi5g1v0080900	Protein kinase
Lj0g3v0033099	0.901976	0.93506	1.09237	NA	NA
Lj3g3v0428460	1.09063	1.32794	1.51947	LotjaGi3g1v0042500	Protein kinase
Lj0g3v0100539	2.35453	2.5224	2.33072	LotjaGi6g1v0087800	Protein kinase
Lj3g3v2330790	0.7667	0.996341	1.29702	LotjaGi3g1v0383100	NA
Lj0g3v0273269	0.621483	0.721502	1.15309	NA	NA
Lj1g3v4726850	0.766988	0.708303	1.04417	LotjaGi1g1v0734700	NA
Lj0g3v0155819	1.38765	1.8999	2.81154	LotjaGi1g1v0668300	2OG-FE(II) OXYGENASE FAMILY PROTEIN
Lj6g3v0085390	1.43462	1.57341	1.89718	LotjaGi6g1v0009300	NA
Lj0g3v0327959	1.09601	1.2861	1.30696	LotjaGi4g1v0247200	NA
Lj4g3v0073800	0.802177	1.12568	1.19551	NA	NA
Lj6g3v1693830	0.802177	1.12568	1.19551	NA	NA
Lj4g3v2717130	0.6926	0.833247	0.592389	LotjaGi4g1v0391800	G-protein beta WD-40 repeat
Lj0g3v0296169	1.48455	1.80108	1.86516	NA	NA
Lj0g3v0068119	1.20805	1.30182	1.33337	NA	ABC-type spermidine/pu
Lj0g3v0190419	6.21221	5.41808	6.08613	NA	NA
Lj1g3v2883900	0.785	0.832454	1.31936	LotjaGi1g1v0489800	Transcription factor NAI1
Lj1g3v1786150	0.940069	1.16216	1.49697	LotjaGi1g1v0367500	HSFA9
Lj0g3v0059439	1.17875	0.931769	1.24128	NA	NA
Lj0g3v0207509	2.31683	2.45582	2.14381	NA	NA
Lj0g3v0066029	0.983835	1.21989	1.56472	LotjaGi1g1v0367500	HEAT SHOCK TRANSCRIPTION FACTOR
Lj0g3v0262389	0.582526	0.615907	0.669214	LotjaGi3g1v0168900	Protein of unknown function DUF966
Lj1g3v4118220	0.619778	0.682131	0.839513	LotjaGi1g1v0662700	Putative cyclin-like F-box
Lj0g3v0037729	1.16526	1.19236	1.45257	LotjaGi3g1v0043300	NA
Lj3g3v0275710	0.635095	0.803988	0.800413	LotjaGi3g1v0020900	Protein of unknown function DUF761
Lj0g3v0009339	0.754507	0.731881	1.01711	NA	NA
Lj3g3v1666250	1.66538	2.19657	2.69455	LotjaGi3g1v0285200	NA
Lj0g3v0037739	1.24552	1.25469	1.51856	LotjaGi2g1v0024400	Type II inositol-1,4,5-
Lj4g3v2978990	0.942919	1.05453	0.802838	NA	NA
Lj0g3v0329039	1.65112	1.9135	2.08789	LotjaGi3g1v0255500	Cytochrome P450 monooxygenase
Lj0g3v0093139	1.58236	1.97512	2.15823	LotjaGi1g1v0780600	NADP-dependent oxidoreductase domain
Lj0g3v0308339	0.998279	0.94514	0.867279	LotjaGi1g1v0170500	NA
Lj6g3v1967030	2.6149	3.23288	3.14377	LotjaGi6g1v0317300	MIP family channel proteins
Lj2g3v3234650	1.09058	1.08789	1.39593	NA	NA
Lj3g3v3033300	0.656798	1.09593	1.20501	LotjaGi3g1v0485200	DUF1635
Lj1g3v0514210	3.99671	3.3769	4.29997	NA	NA
Lj2g3v0690110	1.67422	1.82525	2.51479	LotjaGi4g1v0462700	NA
Lj6g3v0030010	2.04249	2.22915	3.27114	LotjaGi6g1v0005500	NA
Lj3g3v3513760	1.49913	1.70099	2.11404	LotjaGi3g1v0529200	Cytochrome P450
Lj6g3v1812110	0.883505	0.861464	1.34712	LotjaGi6g1v0290400	LysM type receptor kinase
Lj2g3v2256370	0.780361	0.798309	0.792168	NA	NA
Lj2g3v3234640	1.11961	1.03331	1.44176	NA	NA
Lj0g3v0150999	4.23723	3.78401	4.37522	NA	NA
Lj0g3v0037719	1.14221	1.14153	1.40793	LotjaGi2g1v0024400	ENDONUCLEASE/EXONUCLEASE/PHOSPHATASE FAMILY PROTEIN
Lj2g3v0727360	1.7748	2.25861	2.25765	LotjaGi2g1v0206500	No apical meristem (NAM) protein
Lj2g3v1378750	1.19343	1.36285	1.45861	LotjaGi2g1v0317700	athogenesis-related protein Bet v I family
Lj0g3v0297219	1.73313	1.87359	1.91731	LotjaGi1g1v0094400	SGNH hydrolase
Lj4g3v0119710	0.883634	1.28685	1.172	LotjaGi4g1v0007500	Cytochrome P450
Lj5g3v0659470	0.875911	1.45652	2.09211	LotjaGi5g1v0080900	Protein kinase
Lj3g3v3033310	0.653932	1.09055	1.19492	LotjaGi3g1v0485200	NA
Lj3g3v0288910	4.55532	5.81471	5.96476	LotjaGi3g1v0021400	Histidine phospho
Lj0g3v0083779	0.611987	0.75151	0.657282	LotjaGi1g1v0310300	NA
Lj0g3v0253369	0.811917	0.803497	0.85927	LotjaGi5g1v0072700	NA
Lj1g3v1732420	1.90455	3.39725	3.2632	LotjaGi1g1v0362200	NA
Lj0g3v0268559	1.1498	1.28281	1.44302	LotjaGi3g1v0117600	Basic-leucine zipper domain
Lj0g3v0020719	0.611061	0.648767	0.854643	LotjaGi1g1v0575800	Barwin-related endoglucanase
Lj0g3v0079839	0.611061	0.648767	0.854643	LotjaGi1g1v0575800	Barwin-related endoglucanase
Lj0g3v0240659	0.611061	0.648767	0.854643	LotjaGi1g1v0575800	Barwin-related endoglucanase
Lj5g3v1315640	0.993375	1.06235	1.41687	LotjaGi5g1v0206000	RmlC-like cupins
Lj0g3v0137049	0.969579	0.987384	1.32535	LotjaGi1g1v0121800	UDP-Glycosyl
Lj3g3v2719850	0.768495	0.628643	0.651558	LotjaGi3g1v0428600	amidohydrolases
Lj5g3v1793340	0.785225	1.0902	1.29229	NA	NA
Lj6g3v0260760	1.09635	1.21706	1.27021	NA	NA
Lj6g3v2116850	0.917706	1.02207	1.09548	LotjaGi6g1v0341300	NA
Lj5g3v1988780	1.8175	2.67056	3.30413	NA	Cycas taitungensis
Lj4g3v0137750	1.51133	2.07338	1.96406	LotjaGi4g1v0012400	NA
Lj0g3v0312949	0.796148	0.754876	0.714732	LotjaGi4g1v0137300	Acetyl-CoA synthetase-like
Lj0g3v0161489	5.56682	5.4015	6.17886	LotjaGi6g1v0145400	Cytochrome P450
Lj4g3v0119720	0.836981	1.21044	1.12438	LotjaGi4g1v0007500	Cytochrome P450
Lj4g3v2666350	0.854248	0.727082	0.945374	LotjaGi4g1v0386600	Cytochrome P450
Lj2g3v1024020	0.966425	1.46582	1.60597	NA	NA
Lj2g3v1022860	0.966425	1.46582	1.60597	NA	NA
Lj2g3v1835070	1.40862	1.62503	1.2484	NA	NA
Lj1g3v5021140	2.67621	3.17804	3.15302	LotjaGi1g1v0787900	NA
Lj3g3v0893880	5.97042	5.39937	6.37891	NA	NA
Lj0g3v0300529	0.59273	0.60455	0.641527	LotjaGi5g1v0185100	Serine/threonine-protein phosphatase
Lj0g3v0112879	1.01435	1.10176	1.24972	LotjaGi3g1v0098000	Protein kinase
Lj0g3v0066529	1.01202	0.969655	0.845292	LotjaGi2g1v0357700	Lysine histidine
Lj5g3v2112210	1.1745	1.83097	2.29615	LotjaGi5g1v0326300	NA
Lj6g3v2130140	0.765201	1.1269	1.43226	LotjaGi6g1v0342900	Protein kinase
Lj0g3v0066539	1.00088	0.973785	0.840284	LotjaGi2g1v0357700	NA
Lj1g3v2839220	0.882495	0.894965	1.03789	LotjaGi1g1v0487200	NA
Lj4g3v2857420	0.784895	1.0455	1.04643	LotjaGi6g1v0144200	NA
Lj3g3v2718830	1.00272	1.32005	1.58704	NA	Protein kinase
Lj0g3v0035969	0.921997	1.16475	1.35845	NA	NA
Lj3g3v1993830	2.01433	2.71017	3.13394	NA	NA
Lj3g3v1993840	1.86164	2.22068	2.17803	LotjaGi6g1v0062000	NA
Lj6g3v0815760	6.86072	7.76669	7.7389	LotjaGi6g1v0189800	NA
Lj4g3v2618250	1.66892	1.42499	1.28341	LotjaGi4g1v0380200	GLUTATHIONE S-TRANSFERASE
Lj0g3v0058429	0.952537	1.6577	1.64651	LotjaGi1g1v0042600	WRKY
Lj0g3v0253349	0.757629	0.775461	0.770718	LotjaGi5g1v0072700	CheY-like
Lj0g3v0307599	0.702395	0.695929	0.673167	LotjaGi4g1v0172800	Rhamnogalacturonate lyase
Lj1g3v0605120	2.21533	2.89462	3.31684	LotjaGi1g1v0242200	NA
Lj0g3v0173689	1.80111	1.6561	1.80305	LotjaGi1g1v0163800	Protein kinase-like (PK-like)
Lj0g3v0241859	1.04664	1.02705	0.920416	LotjaGi5g1v0286800	Type I inositol-1,4,5-
Lj6g3v2130130	0.739328	1.11115	1.41698	LotjaGi6g1v0343000	Glutamyl-tRNA(Gln) amido
Lj3g3v2995580	1.33954	1.65639	2.1415	LotjaGi3g1v0477700	Zinc finger, C2H2
Lj0g3v0085729	2.70473	2.72827	2.5564	NA	NA
Lj0g3v0066009	4.11664	4.27253	5.0708	NA	NA
Lj0g3v0286809	1.6329	3.37294	4.32556	LotjaGi6g1v0077500	NA
Lj4g3v0137740	1.38386	1.486	1.46319	LotjaGi4g1v0012500	NA
Lj0g3v0276689	1.54507	1.48106	1.57193	LotjaGi5g1v0237600	Glycoside hydrolase
Lj2g3v1510590	1.67119	1.36718	1.30453	LotjaGi2g1v0337200	Cellulose synthase-like protein
Lj2g3v1022840	0.948465	1.14584	1.32925	NA	NA
Lj3g3v1061470	0.87219	1.18498	1.53545	LotjaGi3g1v0158000	NHL REPEAT-CONTAINING PROTEIN
Lj4g3v0073810	0.649077	0.937752	0.960306	NA	NA
Lj6g3v1693840	0.649077	0.937752	0.960306	NA	NA
Lj4g3v0620750	1.58468	1.49684	1.98714	NA	NA
Lj0g3v0307879	2.97998	4.42204	3.37743	NA	NA
Lj5g3v2217190	0.874617	0.686153	1.26713	LotjaGi5g1v0341500	NA
Lj6g3v2116900	2.08599	2.38066	3.02571	LotjaGi6g1v0341900	Homogentisate phytylprenyl
Lj3g3v2888270	0.614495	0.783514	0.840011	LotjaGi3g1v0461800	Protein kinase-like (PK-like)
Lj0g3v0246819	1.74787	1.80579	1.53561	LotjaGi2g1v0313500	NA
Lj5g3v0659670	1.97087	1.69684	1.91924	LotjaGi5g1v0080500	Auxin_inducible,Auxin responsive SAUR protein
Lj5g3v1259860	1.09475	1.40593	1.77021	LotjaGi5g1v0200400	alpha/beta-Hydrolases
Lj3g3v3510250	0.765259	0.861155	0.935804	LotjaGi3g1v0525300	NA
Lj4g3v0620760	1.48343	1.26818	1.82742	NA	NA
Lj0g3v0321389	0.833435	1.12647	1.1956	LotjaGi3g1v0438200	Protein kinase
Lj5g3v2183850	1.03136	1.20856	1.53223	LotjaGi5g1v0339300	NA
Lj0g3v0041859	1.29989	1.42079	1.4737	NA	NA
Lj0g3v0035929	0.854464	1.23312	1.34514	NA	GAG-POL-RELATED RETROTRANSPOSON
Lj6g3v0030000	1.75522	1.88932	2.9855	LotjaGi6g1v0005500	Soybean phosphate
Lj3g3v0397240	2.38623	3.02443	3.08874	LotjaGi3g1v0035600	No apical meristem (NAM) protein
Lj2g3v0322770	0.599695	0.701431	0.601832	LotjaGi2g1v0123500	Protein kinase
Lj5g3v1050270	1.34711	1.21773	1.29484	LotjaGi5g1v0179100	Lateral organ boundaries, LOB
Lj5g3v1206680	0.746607	1.04164	1.03669	LotjaGi5g1v0192800	Protein kinase
Lj0g3v0043059	1.1826	1.21334	1.2673	LotjaGi3g1v0186500	WRKY
Lj1g3v0130090	1.56204	2.05515	2.33366	LotjaGi2g1v0450600	Cytochrome P450
Lj3g3v0323320	3.10675	3.95174	4.53149	LotjaGi3g1v0027300	Calmodulin-binding protein-like protein
Lj0g3v0055369	0.621298	0.718532	0.706724	LotjaGi1g1v0557200	MLO-like protein
Lj1g3v3330250	0.621298	0.718532	0.706724	LotjaGi1g1v0557200	MLO-like protein
Lj1g3v4764700	2.41211	2.52388	3.4998	NA	NA
Lj0g3v0012259	2.11901	2.24034	2.15256	LotjaGi6g1v0087800	C2 calcium-dependent membrane targeting
Lj3g3v3714390	1.10862	1.19054	1.27175	NA	NA
Lj3g3v0429350	1.11354	1.44192	1.73052	LotjaGi3g1v0045800	Ankyrin repeat
Lj4g3v3015110	0.74902	0.889907	1.35802	LotjaGi4g1v0440200	Isoamylase
Lj5g3v0615690	0.760105	0.747924	0.787906	LotjaGi5g1v0072700	NA
Lj1g3v5021100	1.19107	1.02229	0.956242	LotjaGi1g1v0787800	NA
Lj0g3v0308309	0.630384	1.15848	1.56923	LotjaGi1g1v0170600	Protein kinase-like (PK-like)
Lj0g3v0072279	0.835492	0.714461	0.957498	NA	NA
Lj1g3v2786630	0.905185	0.728495	0.729053	LotjaGi1g1v0481400	NA
Lj0g3v0035959	0.806351	1.00754	1.22753	NA	NA
Lj0g3v0155979	1.02938	1.33756	1.60145	LotjaGi3g1v0310300	Protein kinase-like
Lj0g3v0125799	0.847963	0.887389	0.89891	LotjaGi5g1v0105900	U-box
Lj5g3v1699100	2.52822	3.97151	4.38873	LotjaGi5g1v0253300	RPG
Lj0g3v0332549	1.48866	1.32493	1.55942	NA	NA
Lj0g3v0067619	1.09133	1.26047	1.36819	LotjaGi4g1v0247200	NA
Lj0g3v0356389	1.56283	1.66766	2.16736	NA	Disease resistance protein
Lj0g3v0255739	0.733265	0.862889	1.01216	NA	NA
Lj0g3v0164769	0.859056	1.43962	1.35899	LotjaGi1g1v0577300	Bifunctional inhibitor/plant lipid
Lj3g3v2576120	0.94788	1.02419	1.05004	LotjaGi3g1v0410700	Heat shock protein
Lj5g3v1050280	1.29825	1.21758	1.28537	LotjaGi5g1v0179100	Lateral organ boundaries, LOB
Lj3g3v2887200	1.0741	1.25387	1.41491	NA	Protein kinase
Lj5g3v1976460	1.09186	1.34067	1.5892	NA	NA
Lj0g3v0190199	0.902922	1.38502	1.04755	LotjaGi6g1v0302400	S-adenosylmethionine decarboxylase
Lj2g3v3058590	0.864082	0.710536	0.730321	LotjaGi1g1v0048000	Protein kinase
Lj6g3v1051220	1.11936	1.59331	1.72246	LotjaGi2g1v0254500	ATPase
Lj1g3v2372380	1.25428	1.72591	1.85659	LotjaGi1g1v0444300	NA
Lj3g3v2887190	0.669669	1.01605	1.21791	LotjaGi3g1v0310300	Protein kinase
Lj4g3v1896050	1.62841	1.80019	2.40027	NA	Disease resistance protein
Lj0g3v0084449	0.728788	0.739873	0.920706	LotjaGi1g1v0033100	LEUCINE-RICH REPEAT-CONTAINING PROTEIN
Lj1g3v1788350	0.788201	0.912323	1.19355	LotjaGi1g1v0371900	Protein kinase-like (PK-like)
Lj3g3v0428470	1.07054	1.14094	1.53047	LotjaGi3g1v0042500	NA
Lj0g3v0033109	0.955104	1.27539	1.30369	NA	NA
Lj3g3v2887130	1.10467	1.23853	1.18242	NA	Gag-pol polyprotein
Lj1g3v4107160	1.14543	1.08324	1.38553	LotjaGi1g1v0662400	Cyclin-like F-box
Lj0g3v0150499	1.04351	0.972769	0.977642	LotjaGi4g1v0315300	NA
Lj5g3v0629110	1.00434	1.09645	0.880472	NA	NA
Lj1g3v4515870	0.72235	0.84842	0.758698	LotjaGi1g1v0705500	Leucine-rich repeat
Lj4g3v0485670	1.37462	1.51666	1.39548	NA	Diguanylate cyclase
Lj1g3v3368880	0.892474	1.2105	1.30673	LotjaGi1g1v0563500	SERPIN-RELATED
Lj1g3v4107170	1.1454	1.08329	1.38551	LotjaGi1g1v0662400	NA
Lj2g3v1014560	0.733047	0.766423	0.692168	LotjaGi2g1v0248800	Aldehyde/histidinol dehydrogenase
Lj2g3v1022830	0.990844	1.37122	1.62266	NA	NA
Lj0g3v0291299	2.43617	2.79576	3.13979	LotjaGi4g1v0170000	Zinc finger, RING-type
Lj4g3v2978980	1.02506	0.967681	0.824182	LotjaGi4g1v0428700	NA
Lj1g3v4447110	0.654866	1.01617	1.56117	LotjaGi1g1v0715300	ATPase
Lj1g3v4447120	0.654866	1.01617	1.56117	LotjaGi1g1v0715300	ATPase
Lj4g3v2140260	2.28926	3.2964	4.02229	LotjaGi4g1v0308700	Protein kinase
Lj0g3v0076249	1.01643	0.993087	1.48314	LotjaGi2g1v0287000	Heme-dependent peroxidases
Lj2g3v0167030	1.25746	1.32223	1.73479	LotjaGi2g1v0057600	NA
Lj3g3v0211990	3.07197	3.18826	3.96282	LotjaGi3g1v0017100	Protein kinase
Lj0g3v0145709	1.34384	1.14572	1.49501	LotjaGi1g1v0733200	lant disease resistance response protein
Lj6g3v0779870	0.827891	1.10862	1.30099	LotjaGi2g1v0064000	Bet v1-like
Lj0g3v0130179	0.859478	0.857431	1.07608	NA	GAG/POL/ENV POLYPROTEIN
Lj5g3v2056250	0.981546	1.24651	1.31602	NA	NA
Lj0g3v0316049	1.99152	2.19855	2.16572	LotjaGi6g1v0087700	NA
Lj4g3v1881920	3.74213	3.48006	3.70525	LotjaGi1g1v0165900	Na+/H+ antiporter nha1
Lj2g3v0720140	1.11184	1.29466	1.61352	LotjaGi2g1v0205300	NA
Lj1g3v2011890	1.45155	1.68087	2.02095	NA	NA
Lj0g3v0087029	0.592891	0.644615	0.920721	NA	NA
Lj2g3v3339050	1.36577	1.17149	1.25166	LotjaGi1g1v0007200	NA
Lj1g3v5060810	0.727668	0.637222	0.813976	LotjaGi1g1v0797300	S-adenosyl-L-methionine-dependent methyl
Lj1g3v3729250	1.3463	2.42751	2.80599	LotjaGi1g1v0616100	NA
Lj6g3v2168690	1.3083	1.46881	1.56547	LotjaGi6g1v0345100	Gnk2-homologous
Lj4g3v2833050	0.628949	0.604202	0.821199	LotjaGi4g1v0413100	Glutamyl-tRNA(Gln) amido
Lj2g3v1989230	1.40482	1.71413	1.7752	LotjaGi2g1v0420900	Receptor serine/threonine kinase, putative
Lj4g3v2604650	3.56047	3.8401	5.54867	LotjaGi4g1v0378000	Domain of unknown function DUF640
Lj2g3v1024000	1.05424	1.53395	1.74471	NA	NA
Lj1g3v0318290	0.595768	0.75697	0.761942	LotjaGi1g1v0175500	NA
Lj3g3v1133710	0.774606	0.690647	0.972996	LotjaGi3g1v0174000	Protein of unknown function DUF868
Lj5g3v1207790	0.700312	0.811639	1.19672	LotjaGi5g1v0193100	3-ketoacyl-CoA synthase
Lj1g3v4851630	1.47645	1.93586	2.54565	LotjaGi1g1v0759500	NA
Lj0g3v0171409	0.919702	1.02695	1.41949	LotjaGi3g1v0095900	Apple-like
Lj2g3v0741900	1.54575	2.01291	1.59922	NA	NA
Lj0g3v0170109	1.39334	1.48318	1.96994	LotjaGi1g1v0104700	Protein kinase
Lj4g3v1154250	1.32246	1.36757	1.39899	LotjaGi4g1v0190000	Endonuclease/exonuclease/phosphatase
Lj0g3v0163919	3.00772	3.4635	4.1567	LotjaGi2g1v0121000	Resistance protein
Lj4g3v0165040	1.84191	1.91433	2.08189	NA	NA
Lj0g3v0240279	1.17894	1.24248	1.27591	LotjaGi3g1v0186500	WRKY
Lj5g3v2056260	0.956764	1.22976	1.29126	NA	NA
Lj0g3v0292239	0.980018	1.59168	1.98429	LotjaGi1g1v0122000	UDP-glucuronosyl/UDP-glucosyl
Lj1g3v4482330	1.21066	1.71976	1.30684	NA	Probable formate dehydrogenase, selenocysteine-containing chain A
Lj4g3v0119680	1.5246	1.70203	2.1034	LotjaGi4g1v0007400	Cytochrome P450
Lj1g3v3257740	0.622836	0.873868	0.652559	LotjaGi1g1v0545800	NA
Lj0g3v0290529	1.24232	1.45092	1.83397	LotjaGi6g1v0047800	Late embryogenesis abundant protein
Lj0g3v0254749	1.28466	1.76445	1.98095	NA	NA
Lj5g3v1697290	1.279	1.75834	1.97462	NA	AP2/ERF
Lj4g3v0073820	0.590416	0.606026	0.791535	LotjaGi6g1v0278700	NA
Lj6g3v1693850	0.590416	0.606026	0.791535	LotjaGi6g1v0278700	NA
Lj2g3v2506770	1.40058	1.41092	1.45247	NA	NA
Lj0g3v0303249	1.83551	1.81979	2.38444	NA	NA
Lj4g3v0119690	1.52461	1.70203	2.11865	LotjaGi4g1v0007400	Cytochrome P450
Lj2g3v1534080	2.3776	2.66126	3.01124	LotjaGi6g1v0256000	MYB22
Lj0g3v0090929	1.46737	1.47439	1.57638	LotjaGi5g1v0087000	Wall-associated receptor kinase galacturonan-binding domain
Lj0g3v0215059	1.09466	1.64818	1.91244	LotjaGi4g1v0450400	Aldehyde dehydrogenase
Lj3g3v1631860	0.656585	0.754514	1.19488	LotjaGi3g1v0224900	NA
Lj2g3v1034460	5.44286	5.73269	5.93426	NA	NA
Lj5g3v0999930	1.13363	1.50167	1.8967	LotjaGi5g1v0169600	NA
Lj6g3v0000160	0.926044	1.01563	1.48446	LotjaGi5g1v0193100	|3-ketoacyl-CoA synthase
Lj4g3v1972030	1.99868	2.27571	3.3213	NA	NA
Lj0g3v0173699	1.83904	2.06875	2.12219	NA	NA
Lj0g3v0265799	2.93559	3.68535	3.61024	LotjaGi6g1v0317300	NA
Lj6g3v0000150	0.738181	0.849521	1.2346	LotjaGi5g1v0193100	3-ketoacyl-CoA synthase
Lj0g3v0355869	1.33011	2.22157	3.50801	LotjaGi5g1v0144400	Cytochrome P450
Lj0g3v0199249	1.42968	1.4992	2.04511	NA	NA
Lj3g3v3523900	0.939042	0.989176	1.35183	LotjaGi3g1v0529200	Cytochrome P450
Lj1g3v5062630	0.674182	0.950921	0.893066	LotjaGi1g1v0799400	NA
Lj0g3v0035919	0.825065	1.11528	1.25433	NA	NA
Lj0g3v0268949	0.801605	0.907195	1.03943	LotjaGi1g1v0502300	NA
Lj0g3v0073629	1.34022	1.86586	2.2649	LotjaGi5g1v0139800	Protein kinase-like (PK-like)
Lj2g3v1024030	1.01536	1.5018	1.69298	LotjaGi2g1v0254500	AAA-TYPE ATPASE-RELATED
Lj3g3v2532270	2.85978	3.45575	3.49256	LotjaGi3g1v0406200	NA
Lj0g3v0088289	1.15532	1.56771	1.27368	LotjaGi2g1v0366800	Protein kinase
Lj0g3v0173999	0.995152	1.16289	1.2283	LotjaGi1g1v0744000	NA
Lj1g3v4764240	0.995152	1.16289	1.2283	LotjaGi1g1v0744000	NA
Lj1g3v0131220	1.03411	1.28009	1.67397	LotjaGi3g1v0045800	Ankyrin repeat
Lj2g3v1022980	1.04215	1.5373	1.73995	LotjaGi2g1v0254500	Mitochondrial chaperone BCS1
Lj0g3v0277259	2.00244	2.64875	3.26082	LotjaGi6g1v0100200	Transferase
Lj0g3v0087789	0.863841	0.968454	1.08073	NA	NA
Lj5g3v1207770	0.852274	0.941847	1.40658	LotjaGi5g1v0193100	3-ketoacyl-CoA synthase
Lj4g3v1935520	0.872916	1.09604	1.16506	NA	NA
Lj4g3v2666340	1.25565	1.19767	1.45363	NA	NA
Lj0g3v0209309	0.765158	0.905988	0.723228	NA	NA
Lj0g3v0351019	0.798093	0.853302	1.10542	LotjaGi1g1v0122100	GLUCOSYL/GLUCURONOSYL TRANSFERASES
Lj2g3v3234620	0.86453	1.0419	0.989083	LotjaGi1g1v0021000	Protein kinase
Lj3g3v2848810	4.96901	7.515	7.89202	LotjaGi3g1v0449360	NA
Lj0g3v0196469	1.25066	1.35443	2.00893	LotjaGi5g1v0209700	Gnk2-homologous
Lj6g3v1689520	1.40909	1.73021	1.73549	LotjaGi6g1v0274500	Lateral organ boundaries, LOB
Lj2g3v2447140	0.703758	1.13466	1.19255	LotjaGi1g1v0105200	Ethylene responsive
Lj3g3v0537390	0.869839	1.25141	1.38609	LotjaGi4g1v0073400	NA
Lj1g3v3218000	0.607939	0.775559	0.717924	LotjaGi1g1v0535800	Heat shock protein
Lj2g3v3234660	0.929236	1.23365	1.30005	LotjaGi1g1v0020900	Protein kinase
Lj6g3v2116910	1.96135	2.30872	2.89502	LotjaGi6g1v0341900	NA
Lj5g3v1999220	1.50051	1.51638	1.35211	NA	Replication factor A protein
Lj2g3v1985290	0.859752	0.811846	1.75958	LotjaGi2g1v0416100	Heme-dependent peroxidases
Lj4g3v1153040	0.859752	0.811846	1.75958	LotjaGi2g1v0416100	Plant peroxidase
Lj4g3v0473070	5.1977	6.8292	7.26843	LotjaGi4g1v0059500	NA
Lj6g3v1028700	1.02762	1.21711	1.41128	LotjaGi6g1v0191300	L-ascorbate oxidase
Lj3g3v2016000	1.41626	1.49284	1.67437	NA	NA
Lj0g3v0242789	1.24171	1.70979	1.79735	LotjaGi4g1v0397500	Serine-threonine/tyrosine-protein kinase
Lj6g3v0886420	1.11822	1.15576	1.4202	LotjaGi5g1v0156700	Transcription factor GRAS
Lj0g3v0232579	3.15681	3.63414	4.29173	LotjaGi3g1v0132300	Transcription factor Myb
Lj1g3v3116520	1.25682	1.3247	1.93379	NA	Disease resistance protein
Lj1g3v5062640	0.708938	1.00745	0.99508	NA	NA
Lj2g3v0720150	1.07653	1.2849	1.5876	LotjaGi2g1v0205300	NA
Lj0g3v0023629	1.62589	2.09284	2.05712	NA	Polyprotein
Lj2g3v1022800	0.84811	1.3558	1.55281	NA	Mitochondrial chaperone BCS1
Lj5g3v0254490	0.729291	1.01889	0.871557	LotjaGi5g1v0002800	Syringolide-induced protein 14-1-1
Lj5g3v0255660	0.729291	1.01889	0.871557	LotjaGi5g1v0002800	Syringolide-induced protein 14-1-1
Lj5g3v0108170	1.60264	2.07617	2.09314	LotjaGi5g1v0014500	NA
Lj3g3v3235410	0.585387	0.689439	0.752848	LotjaGi3g1v0490300	Major facilitator superfamily
Lj6g3v1837410	1.52918	2.11248	2.05428	LotjaGi4g1v0012400	NA
Lj2g3v0720160	1.02539	1.24211	1.49543	LotjaGi2g1v0205300	NA
Lj0g3v0126759	1.67054	2.56659	2.94929	NA	NA
Lj4g3v0189850	0.878403	1.07945	1.07086	LotjaGi4g1v0019000	NA
Lj0g3v0321439	1.85478	1.76649	1.72932	LotjaGi3g1v0438400	NA
Lj0g3v0064189	0.612629	0.60331	0.584889	LotjaGi1g1v0265000	NA
Lj6g3v1629960	1.58399	2.93356	3.566	LotjaGi6g1v0269900	MtN19
Lj4g3v2827880	0.764989	0.9789	1.44759	LotjaGi4g1v0412600	Aldehyde dehydrogenase
Lj0g3v0187169	1.03719	1.1538	1.09862	NA	NA
Lj5g3v1987680	1.66988	2.4747	3.01369	NA	NA
Lj0g3v0210239	1.24651	1.23364	1.38994	LotjaGi1g1v0341100	RING-H2 finger protein ATL1N
Lj0g3v0194439	1.81933	1.9364	2.39037	NA	NA
Lj0g3v0111019	0.644794	0.701009	0.59145	LotjaGi6g1v0273800	Peroxidase
Lj1g3v4753190	1.68807	1.55638	1.90091	NA	zf-RVT,Reverse
Lj4g3v0189830	0.749192	0.913239	0.897763	LotjaGi4g1v0019000	Cytochrome P450
Lj4g3v0643800	1.71467	2.44608	3.41628	NA	NA
Lj5g3v2288870	1.07121	1.17532	1.19469	LotjaGi5g1v0359230	NA
Lj4g3v0509010	0.829272	0.925234	0.99784	LotjaGi4g1v0066900	Formin Homology
Lj1g3v3289980	0.816254	0.841812	0.735005	LotjaGi1g1v0547100	NA
Lj4g3v2603840	0.833151	0.971248	1.06676	LotjaGi4g1v0374000	NA
Lj4g3v3093850	0.976679	1.4995	1.7566	LotjaGi4g1v0450400	Aldehyde dehydrogenase
Lj5g3v1531200	0.955402	1.70742	2.24761	NA	NA
Lj6g3v0528470	1.61105	1.72725	2.32881	LotjaGi4g1v0411500	NA
Lj1g3v1008940	0.676131	0.675634	0.742629	NA	NA
Lj4g3v2376200	3.11634	3.90159	4.56218	NA	NA
Lj3g3v3510260	0.660821	0.797467	0.891031	LotjaGi3g1v0525300	NPH3
Lj0g3v0233739	1.00906	1.23978	1.46415	LotjaGi3g1v0196500	NA
Lj0g3v0241959	0.756855	1.13807	1.27942	NA	NA
Lj5g3v2288860	1.07459	1.1774	1.1975	LotjaGi5g1v0359230	Chalcone isomerase
Lj0g3v0270019	0.846176	0.754935	1.41435	LotjaGi3g1v0260700	Heavy metal-associated domain
Lj6g3v0484140	1.95065	2.72824	3.96424	LotjaGi4g1v0444700	MATE EFFLUX FAMILY PROTEIN
Lj4g3v1478260	1.03951	1.43627	1.76371	LotjaGi4g1v0390100	plant integral membrane protein T
Lj5g3v0712210	1.2389	1.71936	1.5695	NA	Reverse
Lj5g3v0529060	0.656866	0.973232	0.899738	NA	NA
Lj3g3v1666060	1.39407	1.39628	1.50311	NA	Zinc finger, SWIM-type
Lj0g3v0087919	0.891878	1.32262	1.4877	LotjaGi4g1v0390100	plant integral membrane protein T
Lj0g3v0266389	0.584753	0.875251	1.04319	LotjaGi5g1v0144600	Cytochrome P450
Lj0g3v0235159	1.61851	1.94048	1.78252	NA	Polyprotein
Lj4g3v0189840	0.868146	1.06159	1.05625	LotjaGi4g1v0019000	Cytochrome P450
Lj4g3v0959210	1.58799	2.39449	2.84148	NA	NA
Lj4g3v1535150	2.45752	2.82122	2.54652	LotjaGi4g1v0238900	Protein kinase
Lj0g3v0269609	0.591999	0.647061	0.664688	LotjaGi5g1v0175000	alpha/beta-Hydrolases
Lj3g3v1011000	1.53912	1.44604	1.51912	LotjaGi3g1v0150200	Leucine-rich repeat
Lj2g3v1034480	5.2077	5.73368	6.27714	NA	NA
Lj1g3v1786130	3.29036	3.53922	4.47058	NA	Glutaredoxin-like
Lj4g3v1770570	0.641654	0.6763	0.943673	LotjaGi4g1v0260900	DNA BINDING / TRANSCRIPTION FACTOR
Lj6g3v1481390	1.79192	1.82922	2.25572	NA	NA
Lj4g3v2139660	1.01831	1.13425	1.21402	NA	NA
Lj0g3v0348039	0.972101	1.22823	1.53001	LotjaGi3g1v0310300	Bulb-type lectin domain
Lj0g3v0356599	1.29961	1.26941	1.19084	NA	NA
Lj0g3v0073579	1.39801	1.36786	1.88296	LotjaGi1g1v0104700	NA
Lj0g3v0247349	0.720278	0.770964	0.917046	LotjaGi1g1v0653500	Cytochrome P450
Lj4g3v1736110	0.798156	1.35992	1.81646	LotjaGi4g1v0256600	Transcription factor, MADS-box
Lj2g3v1022850	0.833934	1.23098	1.38213	NA	NA
Lj0g3v0346249	0.977355	1.10986	1.48854	NA	NA
Lj0g3v0309619	0.653549	0.793787	0.702717	NA	NA
Lj0g3v0043719	1.31167	1.45204	2.06619	LotjaGi1g1v0606200	UDP-Glycosyl
Lj5g3v0999920	0.877289	1.11423	1.44799	LotjaGi5g1v0169500	NA
Lj0g3v0315619	1.71593	1.68912	2.14942	NA	NA
Lj0g3v0075949	0.862291	0.939333	0.984253	LotjaGi3g1v0536900	DNA MISMATCH REPAIR MUTS RELATED PROTEINS
Lj1g3v2808060	0.956673	1.03372	1.06722	LotjaGi1g1v0482600	SUBTILISIN-LIKE PROTEASE (PLANT)
Lj5g3v1987550	0.785218	1.06002	1.19525	NA	Ribonuclease H-like
Lj5g3v1987560	0.785218	1.06002	1.19525	NA	NA
Lj4g3v1107520	0.944946	1.09338	0.999709	LotjaGi4g1v0169600	Glycoside hydrolase
Lj0g3v0090919	1.48421	1.61666	1.66802	LotjaGi5g1v0087000	Wall-associated receptor kinase galacturonan-binding domain
Lj1g3v1060470	1.23641	1.40243	1.27264	LotjaGi1g1v0295000	Kinase-like protein
Lj4g3v0037580	2.44172	2.33282	3.15475	LotjaGi4g1v0002900	No apical meristem (NAM) protein
Lj4g3v0050650	2.44172	2.33282	3.15475	LotjaGi4g1v0002900	No apical meristem (NAM) protein
Lj4g3v3015210	1.36413	1.79146	2.09376	LotjaGi4g1v0440600	Phospholipase A2
Lj0g3v0243689	0.806029	1.04677	1.10863	NA	NA
Lj4g3v0338220	0.949846	1.40023	1.10135	NA	NA
Lj1g3v2808050	0.986763	0.973141	1.12126	LotjaGi1g1v0482600	Proteinase inhibitor I9
Lj0g3v0271149	0.805287	1.04677	1.10863	NA	NA
Lj6g3v1513560	1.83196	2.50423	2.7316	LotjaGi6g1v0253900	Bet v I type allergen
Lj0g3v0083619	0.881801	1.08318	1.15646	NA	NA
Lj4g3v2266290	1.927	2.37349	2.42677	LotjaGi4g1v0331200	Putative uncharacterized protein TPD1B1-1
Lj4g3v0619970	1.16863	1.43098	1.41452	LotjaGi4g1v0075400	NA
Lj0g3v0270929	1.22846	1.26021	1.43643	NA	NA
Lj2g3v0813210	3.29888	3.55464	4.97221	LotjaGi2g1v0219600	Purine and uridine phosphorylases
Lj6g3v0056670	0.99296	1.47619	1.77933	NA	Cysteine--tRNA ligase
Lj2g3v1277700	1.2787	1.34161	1.53295	LotjaGi2g1v0302300	Zinc finger, Dof-type
Lj0g3v0270679	0.750696	0.946047	1.37451	LotjaGi2g1v0199900	NA
Lj0g3v0162139	0.880464	1.09862	1.31887	LotjaGi2g1v0274900	Hemerythrin
Lj3g3v3386580	0.67066	0.87931	0.703941	LotjaGi3g1v0514000	Zinc finger, GATA-type
Lj4g3v0450430	3.3682	3.50231	5.34129	LotjaGi4g1v0045200	Leucine-rich repeat
Lj1g3v5060610	1.82409	2.44647	1.72623	LotjaGi1g1v0796900	NA
Lj2g3v3260100	1.82409	2.44647	1.72623	LotjaGi1g1v0796900	NA
Lj0g3v0058009	1.73547	2.53482	3.29918	NA	NA
Lj1g3v5060640	1.62739	1.66947	1.76408	LotjaGi1g1v0796900	NA
Lj0g3v0188629	1.22387	2.07782	2.11599	LotjaGi1g1v0173500	Protein kinase
Lj0g3v0202219	1.86532	2.30382	1.80724	NA	NA
Lj0g3v0075189	1.76911	2.6382	2.9943	NA	NA
Lj6g3v1837420	1.58847	2.20461	2.08851	LotjaGi6g1v0293100	NA
Lj2g3v3084240	0.675731	0.727271	1.0649	LotjaGi1g1v0044600	NBS-containing resistance-like protein
Lj0g3v0230959	2.03309	3.03552	3.00865	NA	Zinc finger, C2H2
Lj1g3v2372270	2.03309	3.03552	3.00865	NA	Zinc finger, C2H2
Lj0g3v0218179	2.38842	3.08366	3.73317	NA	NA
Lj2g3v3260130	1.62197	1.66052	1.75986	LotjaGi1g1v0796900	NA
Lj2g3v2876120	0.60057	0.673212	1.07693	LotjaGi1g1v0068200	LYSOSOMAL ACID LIPASE-RELATED
Lj5g3v1696870	1.99502	2.04872	2.26318	NA	NA
Lj0g3v0344619	1.82613	1.96974	2.31274	LotjaGi1g1v0373800	CALMODULIN-BINDING PROTEIN-RELATED
Lj4g3v1073550	0.985059	0.950682	0.921741	NA	NA
Lj0g3v0075609	0.74337	1.07974	1.3059	LotjaGi3g1v0233800	ZINC_FINGER_C2H2
Lj4g3v1289550	0.694703	0.818749	0.750214	LotjaGi4g1v0212100	ACT-like
Lj0g3v0002579	1.05554	1.77069	1.29311	NA	NA
Lj5g3v1853120	0.999904	2.00125	2.49682	NA	NA
Lj0g3v0254009	2.65668	3.19087	3.86969	NA	GAG-POL-RELATED RETROTRANSPOSON
Lj3g3v1666070	1.24532	1.23016	1.50301	NA	FAR1
Lj1g3v0948550	2.92325	3.25272	4.59794	LotjaGi1g1v0171700	NA
Lj0g3v0157999	3.11867	3.40129	4.60525	LotjaGi1g1v0580900	HLH
Lj5g3v1697710	1.56247	1.65385	2.27774	LotjaGi5g1v0255800	RING finger-like protein
Lj2g3v1467980	0.849185	1.17785	1.1534	NA	Protein of unknown function DUF1399
Lj0g3v0361729	0.64659	1.02546	1.23465	LotjaGi3g1v0238000	UDP-glucuronosyl/UDP-glucosyl
Lj3g3v3245270	0.664336	0.773696	0.760577	LotjaGi3g1v0494700	Protein kinase-like (PK-like)
Lj0g3v0254059	5.57933	6.17968	7.13386	LotjaGi6g1v0106600	NA
Lj5g3v1774940	0.879249	1.5303	1.80015	LotjaGi5g1v0267300	NA
Lj0g3v0036609	1.08174	1.24913	1.21818	NA	NA
Lj0g3v0229569	1.93737	2.14241	3.0282	LotjaGi5g1v0196600	ZF-HD homeobox protein
Lj3g3v2576130	0.936703	0.930704	1.20435	NA	NA
Lj6g3v1753240	0.583403	0.729025	0.618165	LotjaGi6g1v0285900	HYPOTHETICAL MEMBRANE PROTEIN
Lj0g3v0086639	1.03383	1.33745	1.04711	LotjaGi6g1v0130300	Protein phosphatase 2C
Lj5g3v0296040	0.6725	0.850332	1.06987	LotjaGi5g1v0031200	NA
Lj1g3v3947020	1.54114	2.32436	2.06819	LotjaGi1g1v0639000	Toll/Interleukin receptor TIR domain
Lj4g3v1329130	0.88448	0.945764	0.977303	NA	NON-LTR RETROELEMENT REVERSE TRANSCRIPTASE RELATED
Lj0g3v0100769	1.39668	1.69466	2.19631	LotjaGi3g1v0383900	Zinc finger, RING/FYVE/PHD-type
Lj1g3v1687840	0.888809	1.05855	1.22674	LotjaGi1g1v0358400	Protein kinase
Lj2g3v1024060	0.994351	1.57603	1.71281	LotjaGi2g1v0254700	ATPase
Lj5g3v0616400	0.659057	0.686898	0.871109	NA	Gag-pol polyprotein
Lj0g3v0098989	0.976603	1.35623	1.5194	LotjaGi1g1v0500800	NA
Lj1g3v0862920	0.664533	0.957774	0.66375	NA	NA
Lj0g3v0294769	2.10183	2.6677	2.44644	LotjaGi4g1v0133300	NA
Lj5g3v0254460	0.680118	0.964838	0.969219	NA	NA
Lj5g3v0255630	0.680118	0.964838	0.969219	NA	NA
Lj5g3v0736800	1.1882	1.8602	2.43684	LotjaGi5g1v0093300	ZINC FINGER FYVE DOMAIN CONTAINING PROTEIN
Lj0g3v0243699	0.726187	1.03314	1.06816	NA	NA
Lj5g3v0254470	0.680892	0.931293	0.906391	NA	NA
Lj5g3v0255640	0.680892	0.931293	0.906391	NA	NA
Lj2g3v1733400	1.06136	2.23396	2.38051	LotjaGi2g1v0387200	NA
Lj0g3v0062329	1.18507	1.85962	2.43404	LotjaGi5g1v0093300	ZINC FINGER FYVE DOMAIN CONTAINING PROTEIN
Lj1g3v2036560	0.615451	0.665774	0.758453	LotjaGi1g1v0399200	Dimethylaniline monooxygenase
Lj4g3v0336320	4.72805	6.30651	7.30498	LotjaGi4g1v0030900	NA
Lj0g3v0243819	0.91281	1.2342	2.0023	LotjaGi1g1v0146300	UGAR_TRANSPORT_1
Lj5g3v1003930	0.587121	0.811325	1.22326	NA	NA
Lj3g3v0730250	0.62375	0.690293	0.684422	NA	NA
Lj0g3v0293919	4.36942	4.8634	5.48885	NA	NA
Lj2g3v1351550	1.31421	1.48306	1.8298	LotjaGi4g1v0064900	LATERAL SIGNALING TARGET PROTEIN 2
Lj1g3v2113670	1.01192	1.36342	1.53652	LotjaGi1g1v0419700	Myb
Lj5g3v2029620	1.44732	1.61227	2.10167	LotjaGi5g1v0306200	Transcription factor, MADS-box
Lj5g3v1903710	0.976483	1.14291	1.31294	LotjaGi5g1v0169500	NA
Lj0g3v0297549	0.998815	0.984669	0.935076	LotjaGi2g1v0264500	Cytokinin-O-glucosyl
Lj3g3v2736200	1.69617	1.9943	2.57633	LotjaGi3g1v0433800	Protein of unknown function DUF1442
Lj0g3v0192689	0.583508	0.724	0.894584	LotjaGi3g1v0505900	NA
Lj4g3v2263860	1.51342	2.0155	2.10341	NA	Pectinesterase inhibitor
Lj4g3v0073780	0.610144	0.874621	1.03452	NA	NA
Lj6g3v1693810	0.610144	0.874621	1.03452	NA	NA
Lj2g3v1024100	1.08689	1.53497	1.55301	LotjaGi2g1v0254500	NA
Lj4g3v2226780	0.6002	0.918498	0.660122	LotjaGi4g1v0315100	P-glycoprotein 12
Lj3g3v0948220	2.23364	2.74065	3.41342	LotjaGi3g1v0132300	ranscription factor Myb
Lj2g3v1068510	0.453532	0.611972	0.566545	LotjaGi2g1v0261000	PUTATIVE TRANSCRIPTIONAL REGULATOR
Lj5g3v0102640	0.357959	0.600916	0.539114	LotjaGi5g1v0017000	Glycoside hydrolase
Lj2g3v1968410	0.492132	0.655811	0.538295	LotjaGi4g1v0094600	Transcription factor GRAS
Lj2g3v0636730	0.572172	0.608849	0.541389	LotjaGi2g1v0190800	Annexin
Lj2g3v3084340	0.438612	0.644927	0.559909	NA	NA
Lj3g3v3654470	0.323432	0.618497	0.564202	LotjaGi3g1v0546800	Protein kinase
Lj1g3v1821080	0.5742	0.636044	0.57858	LotjaGi1g1v0379100	NA
Lj0g3v0126429	0.576548	0.659883	0.547236	LotjaGi4g1v0020900	ATPase
Lj2g3v0000280	0.384117	0.590517	0.49713	LotjaGi2g1v0010400	Cytochrome P450
Lj0g3v0260379	0.265618	0.594164	0.523606	LotjaGi5g1v0017700	NA
Lj0g3v0090629	0.551812	0.613386	0.42083	LotjaGi6g1v0213100	NA
Lj4g3v0768510	0.503787	0.627152	0.16739	LotjaGi4g1v0096200	NA
Lj5g3v0614830	0.529301	0.612009	0.541503	LotjaGi5g1v0069800	Endonuclease/exonuclease/phosphatase
Lj1g3v3918110	0.453854	0.670089	0.526037	NA	Putative gag-pol polyprotein
Lj0g3v0070759	0.306877	0.601149	0.374755	LotjaGi3g1v0329100	Plant invertase/pectin methylesterase inhibito
Lj5g3v0769550	0.243707	0.655982	0.509074	LotjaGi5g1v0094900	NA
Lj2g3v1241150	0.256564	0.603495	0.323817	LotjaGi2g1v0292300	Protein kinase
Lj1g3v3384730	0.493772	0.648384	0.563974	LotjaGi1g1v0567100	Homeodomain-like
Lj2g3v1378790	0.380504	0.706384	0.52785	LotjaGi2g1v0317800	NA
Lj2g3v2002400	0.5989	1.09839	0.571541	LotjaGi2g1v0426300	NA
Lj5g3v1697820	0.433071	0.58741	0.448346	LotjaGi5g1v0255200	ATP-DEPENDENT CLP PROTEASE
Lj4g3v1440960	0.248096	1.95115	0.647264	NA	NA
Lj5g3v1958050	0.309896	0.584903	0.527056	LotjaGi3g1v0552200	Protein kinase
Lj5g3v2245910	0.575294	0.636145	0.117142	LotjaGi5g1v0349800	Protein phosphatase 2C-like
Lj5g3v1962290	0.514345	0.658907	0.562182	LotjaGi5g1v0294200	Glycoside hydrolase
Lj5g3v1062460	0.417603	1.01442	0.426164	LotjaGi5g1v0179600	Oxoglutarate/iron-dependent dioxygenase
Lj4g3v1983350	0.302372	0.627639	0.460324	LotjaGi4g1v0287000	NA
Lj2g3v3248940	0.436165	0.682608	0.423941	LotjaGi1g1v0019200	Nucleotide-binding
Lj5g3v0614820	0.568337	0.624769	0.556677	NA	NA
Lj4g3v0513460	0.564355	0.665391	0.560511	LotjaGi4g1v0069000	NA
Lj0g3v0241199	0.444962	0.623604	0.423454	NA	NA
Lj6g3v1302950	0.444962	0.623604	0.423453	NA	NA
Lj0g3v0241189	0.458922	0.59271	0.39362	NA	NA
Lj6g3v1302970	0.458922	0.59271	0.393619	NA	NA
Lj2g3v3223910	0.285659	0.615956	0.519243	LotjaGi1g1v0023100	Protein kinase
Lj1g3v4203440	0.383004	0.614152	0.457312	NA	NA
Lj2g3v3223920	0.28454	0.598906	0.489298	LotjaGi1g1v0023100	NA
Lj0g3v0311049	0.412418	0.672023	0.497157	LotjaGi1g1v0448500	EF-Hand
Lj0g3v0008809	0.530982	0.658134	0.504115	LotjaGi6g1v0341200	NA
Lj6g3v1776630	0.417473	0.640484	0.433457	NA	NA
Lj6g3v1786810	0.417473	0.640484	0.433457	NA	NA
Lj1g3v2065470	0.354583	0.788608	0.499014	LotjaGi1g1v0404200	G-protein beta WD-40 repeat
Lj1g3v3834110	1.23789	1.95241	1.26193	NA	NA
Lj2g3v2315160	0.311097	0.580965	0.491863	LotjaGi1g1v0116100	thaumatin-like protein
Lj3g3v3006350	0.385221	0.592264	0.437521	LotjaGi3g1v0480500	Arogenate/prephenate dehydratase
Lj3g3v1132450	0.385221	0.592264	0.43819	LotjaGi3g1v0480500	Arogenate/prephenate dehydratase
Lj0g3v0067539	0.367847	0.636505	0.442142	LotjaGi1g1v0214700	Short-chain alcohol dehydrogenase
Lj1g3v1219030	0.520869	0.599463	0.432582	LotjaGi1g1v0312300	NA
Lj1g3v2065480	0.311541	0.705373	0.453931	LotjaGi1g1v0404200	WD40 repeat-like
Lj6g3v0657910	0.572345	0.994233	0.459749	NA	NA
Lj0g3v0359279	0.220322	0.608917	0.465364	LotjaGi1g1v0023100	Hcr9-Avr4-chm1
Lj0g3v0080799	0.491395	0.582949	0.389101	LotjaGi2g1v0000800	NA
Lj5g3v0108280	0.387426	0.689128	0.379673	LotjaGi5g1v0014400	NA
Lj0g3v0232499	0.5477	0.725317	0.540698	LotjaGi1g1v0098700	Adenine nucleotide alpha hydrolases-like
Lj0g3v0034939	0.382717	0.692651	0.518761	NA	NA
Lj4g3v1660970	0.338892	0.602652	0.346637	LotjaGi4g1v0251600	Protein kinase
Lj6g3v1953870	0.545736	0.648219	0.561994	NA	NA
Lj1g3v3904150	0.529153	0.786089	-0.240753	LotjaGi1g1v0631900	KIP1-like
Lj0g3v0113929	1.6223	2.89444	2.07236	NA	NA
Lj0g3v0161589	0.979792	1.48446	0.939819	LotjaGi3g1v0009900	SIGNAL PEPTIDASE COMPLEX CATALYTIC SUBUNIT
Lj0g3v0335109	0.830099	1.08592	0.743805	NA	NA
Lj5g3v0467070	0.498828	0.833976	0.601559	NA	NA
Lj4g3v2785750	0.734777	1.10137	0.800842	LotjaGi4g1v0404700	WRKY
Lj3g3v3650360	0.53075	0.964682	0.6548	LotjaGi3g1v0546100	FAD-linked oxidases
Lj0g3v0090869	0.527426	1.00267	0.571379	NA	NA
Lj0g3v0335339	0.498745	0.703415	0.522266	LotjaGi5g1v0143900	NA
Lj4g3v0072190	1.14833	1.42011	1.06681	LotjaGi6g1v0277600	NA
Lj6g3v1693230	1.14833	1.42011	1.06681	LotjaGi6g1v0277600	Ferric reductase-like
Lj4g3v1400000	0.621011	0.786238	0.324889	LotjaGi4g1v0226300	HYPOTHETICAL PROTEIN,
Lj0g3v0343309	0.764651	1.01794	0.514608	LotjaGi4g1v0390000	Putative serine proteinase
Lj4g3v0153940	0.194261	0.590591	0.395501	LotjaGi4g1v0016000	NA
Lj0g3v0084689	0.276283	0.6113	0.368127	LotjaGi4g1v0231200	FAS-ASSOCIATED PROTEIN
Lj0g3v0192069	0.399697	0.667056	0.429506	LotjaGi6g1v0131600	NA
Lj4g3v2249090	0.569869	0.623087	0.568548	LotjaGi4g1v0313300	Pti1 kinase-like protein
Lj4g3v2096040	0.453972	0.618432	0.424518	LotjaGi4g1v0300600	NA
Lj2g3v0855280	0.294131	0.590257	0.484266	LotjaGi2g1v0224000	NA
Lj0g3v0304899	0.563437	0.603036	0.135329	LotjaGi1g1v0546900	Protein kinase-like (PK-like)
Lj0g3v0096669	0.688115	1.44014	0.41419	LotjaGi5g1v0178600	Lateral organ boundaries, LOB
Lj0g3v0150739	0.406836	0.629505	0.406401	NA	NA
Lj0g3v0133289	0.491199	0.593889	0.468437	LotjaGi3g1v0453700	NA
Lj3g3v3016600	1.0279	1.28932	0.977405	LotjaGi3g1v0481200	Lysine histidine
Lj0g3v0203079	0.670448	1.05764	0.780536	LotjaGi4g1v0102500	AP2/ERF
Lj2g3v1984450	0.586523	0.755247	0.541174	LotjaGi2g1v0413500	Putative basic helix-loop-helix protein BHLH18
Lj0g3v0176869	1.02902	1.5788	0.415067	NA	NA
Lj0g3v0195679	0.511078	0.678063	0.371025	LotjaGi1g1v0611000	NA
Lj4g3v2818880	0.378048	0.588199	0.26621	LotjaGi4g1v0400400	F-box/kelch-repeat protein
Lj3g3v1129000	1.04882	1.32449	0.875395	LotjaGi3g1v0481200	AMINO ACID TRANSPORTER
Lj5g3v0805310	0.417145	1.06135	0.311395	NA	NA
Lj2g3v2171710	1.15941	1.38376	0.822921	NA	NA
Lj1g3v2560500	0.66473	0.790955	0.49303	LotjaGi1g1v0460600	EF-Hand 1
Lj1g3v3019860	0.775886	1.04678	0.752022	LotjaGi1g1v0504700	EF-HAND 2
Lj0g3v0050659	0.377606	1.03801	0.812473	LotjaGi1g1v0010400	Transcriptional regulator STERILE APETALA
Lj2g3v3337320	0.377606	1.03801	0.812473	LotjaGi1g1v0010400	Transcriptional regulator STERILE APETALA
Lj3g3v2873660	1.41317	1.69238	1.11544	LotjaGi3g1v0459500	Major sperm protein
Lj5g3v2263980	0.503278	0.664649	0.557401	LotjaGi5g1v0355600	NA
Lj1g3v0683930	0.552829	1.55816	1.25508	NA	NA
Lj1g3v2976020	0.746684	1.03358	0.770657	LotjaGi1g1v0504700	EF-hand
Lj1g3v2560490	0.670073	0.781833	0.494687	LotjaGi1g1v0460600	EF-Hand
Lj0g3v0042119	0.370472	0.685551	0.242856	LotjaGi5g1v0265500	NA
Lj1g3v1290350	0.342105	0.628705	0.189375	LotjaGi4g1v0408300	NA
Lj4g3v2754200	0.342105	0.628705	0.189375	LotjaGi4g1v0408300	NA
Lj0g3v0161719	1.73607	2.23955	0.973196	LotjaGi4g1v0396200	Cytochrome P450
Lj1g3v3729370	0.559046	0.605303	0.489359	LotjaGi4g1v0053500	EPOXIDE HYDROLASE-RELATED
Lj5g3v0080890	0.482597	0.64669	0.382053	LotjaGi5g1v0021300	Cytochrome P450
Lj3g3v0950620	0.314525	0.594743	0.554549	LotjaGi4g1v0456500	NA
Lj2g3v3088590	0.750499	0.896171	0.523128	LotjaGi1g1v0084600	NA
Lj2g3v0693510	0.644835	0.834814	0.626095	LotjaGi3g1v0521800	Xylose isomerase
Lj0g3v0074709	1.41879	2.00474	1.61322	NA	NA
Lj1g3v5021110	1.31421	1.4949	1.25101	LotjaGi1g1v0787800	Protein kinase
Lj3g3v2733970	-0.138692	0.937502	0.724906	NA	NA
Lj0g3v0338969	0.274601	0.583458	0.548343	LotjaGi1g1v0180300	Protein of unknown function DUF1645
[truncated: 1,766 more rows]

## Sheet: Table_S2
		Table S2 234 DEGs with decreased expression in Ljern1-6
	logFC in WT			logFC in Ljern1-6
MG-20 ID	1 dpi	2 dpi	3 dpi	1 dpi	2 dpi	3 dpi	BlastDescription		Gifu ID
Lj2g3v3373100	5.60214	5.57585	5.55727	-1.76951	-0.768011	NA	Plant regulator RWP-RK family protein	NIN	LotjaGi1g1v0001500
Lj2g3v3222870	2.03058	2.03178	1.25969	-1.87206	-1.68424	NA	S-adenosyl-L-methionine-dependent methyltransferases superfamily protein	IAMT1	LotjaGi1g1v0023500
Lj2g3v3149350	1.70936	1.32528	1.23851	-0.763845	NA	NA	cytochrome P450, family 708, subfamily A, polypeptide 2	CP450	LotjaGi1g1v0033800
Lj1g3v4139440	0.112488	1.16976	2.41793	NA	NA	-0.882527	Laccase/Diphenol oxidase family protein	Laccase/Diphenol oxidase family protein	LotjaGi1g1v0081300
Lj2g3v2598860	1.40465	1.98588	2.20681	NA	-0.753634	NA	expansin A1	Expansin	LotjaGi1g1v0089200
Lj2g3v2437090	2.71685	2.78608	1.91918	NA	-1.20704	NA	---NA---	Uncharacterized	LotjaGi1g1v0106400
Lj2g3v2411360	1.44311	1.00231	0.817555	-0.611372	NA	NA	Peroxidase superfamily protein	Peroxidase superfamily protein	LotjaGi1g1v0109100
Lj0g3v0020349	1.45196	1.01596	0.815643	-0.620775	NA	NA	---NA---	Uncharacterized	LotjaGi1g1v0109100
Lj1g3v0672110	0.907662	0.788709	0.424224	NA	-0.587439	NA	Peroxidase superfamily protein	NA	LotjaGi1g1v0199600
Lj0g3v0137049	0.969579	0.987384	1.32535	-0.909281	NA	NA	UDP-Glycosyltransferase superfamily protein	UDP-Glycosyltransferase	LotjaGi1g1v0121800
Lj3g3v2681670	7.01566	7.52992	7.71059	-2.79334	NA	NA	Major facilitator superfamily protein	NPF8.6	LotjaGi1g1v0123500
Lj2g3v2136010	-0.0731947	0.0708875	2.16167	NA	NA	-1.94163	Laccase/Diphenol oxidase family protein	Laccase/Diphenol oxidase family protein	LotjaGi1g1v0133700
Lj1g3v0183010	1.86178	1.21438	0.597313	-0.838072	-0.640696	NA	Thioredoxin superfamily protein	Thioredoxin superfamily protein	LotjaGi1g1v0137600
Lj5g3v0878400	5.21478	5.12592	4.86147	-2.90903	-2.27814	-2.08642	Aquaporin-like superfamily protein	Nodulin 26-like	LotjaGi1g1v0145800
Lj0g3v0297749	0.0282108	0.607047	0.670513	NA	-0.678452	NA	Galactosyltransferase family protein	Galactosyltransferase family protein	LotjaGi1g1v0151000
Lj1g3v0415090	6.17525	6.7186	7.26423	-1.85377	-2.40783	-2.10255	Leucine-rich repeat protein kinase family protein	RINRK1 (ALB1)	LotjaGi1g1v0182900
Lj1g3v0416320	3.79472	3.98069	4.04726	-0.991622	-1.0932	-1.20381	Actin-binding FH2 (formin homology 2) family protein	Formin homolog	LotjaGi1g1v0184800
Lj0g3v0104079	1.67457	1.78171	1.38755	-0.949965	-0.58324	NA	Xanthine/uracil permease family protein	Xanthine/uracil permease family protein	LotjaGi1g1v0234500
Lj3g3v2921000	2.25735	2.34789	2.72038	-1.27959	NA	NA	Nucleic acid-binding proteins superfamily	replication factor-A carboxy-terminal domain protein	LotjaGi1g1v0243400
Lj0g3v0306689	1.70547	1.64668	1.60504	-0.780844	NA	NA	Protein phosphatase 2C family protein	Protein phosphatase 2C family protein	LotjaGi1g1v0244400
Lj1g3v0627590	2.81396	4.29252	4.31054	-3.48212	-4.61409	-2.96197	PLAC8 family protein	PLANT CADMIUM RESISTANCE 2	LotjaGi1g1v0245300
Lj1g3v1062540	0.869506	0.99239	1.03723	-0.785023	-0.821991	NA	RNA-binding (RRM/RBD/RNP motifs) family protein	RNA-binding	LotjaGi1g1v0295300
Lj0g3v0335709	2.97169	3.56692	3.82317	-2.39752	-2.58572	-2.13239	F-box and associated interaction domains-containing protein	F-box protein	LotjaGi1g1v0297800
Lj0g3v0168319	2.31819	1.74852	1.49695	-0.625204	NA	NA	Major facilitator superfamily protein	Major facilitator superfamily protein	LotjaGi1g1v0302100
Lj1g3v1732400	1.0928	3.36609	2.71798	NA	-1.72213	NA	heptahelical transmembrane protein2	heptahelical transmembrane protein2	LotjaGi1g1v0362100
Lj1g3v1732410	1.79761	4.2172	3.47252	NA	-1.80604	NA	heptahelical transmembrane protein2	heptahelical transmembrane protein2	LotjaGi1g1v0362100
Lj3g3v2261380	1.09461	1.22081	1.12382	-0.629801	NA	NA	sulfate transporter 1;2	sulfate transporter 1;2	LotjaGi3g1v0362200
Lj1g3v1732420	1.90455	3.39725	3.2632	-2.43273	-1.21093	NA	hypothetical protein AT4G33800	Uncharacterized	LotjaGi1g1v0362200
Lj1g3v1787650	1.34616	2.06646	3.05438	NA	NA	-2.0748	HSP20-like chaperones superfamily protein	HSP20-like chaperones superfamily protein	LotjaGi1g1v0369200
Lj1g3v2067530	0.734097	0.844037	0.415977	NA	NA	NA	carotenoid cleavage dioxygenase 1	NA	LotjaGi1g1v0404600
Lj0g3v0068199	1.79537	2.10409	2.10369	-1.03793	NA	NA	Putative lysine decarboxylase family protein	LOG4	LotjaGi1g1v0427900
Lj1g3v2296500	0.767643	0.544567	1.66046	NA	NA	-2.02298	3-ketoacyl-CoA synthase 6	3-ketoacyl-CoA synthase	LotjaGi1g1v0437300
Lj1g3v2581160	0.0355574	0.910097	1.55548	NA	-1.31996	-1.06108	Lateral organ boundaries (LOB) domain family protein	Lateral organ boundaries (LOB) domain family protein	LotjaGi1g1v0463000
Lj1g3v2659360	1.12901	0.406132	0.239202	-0.766857	NA	NA	RHO guanyl-nucleotide exchange factor 3	NA	LotjaGi1g1v0476400
Lj1g3v2994540	4.98933	4.92856	3.94906	-1.36707	NA	NA	O-methyltransferase family protein	O-methyltransferase family protein	LotjaGi1g1v0508300
Lj0g3v0217099	0.527244	0.656835	0.529266	-1.27796	-1.06362	-1.09891	HXXXD-type acyl-transferase family protein	HXXXD-type acyl-transferase family protein	LotjaGi1g1v0513700
Lj1g3v3218000	0.607939	0.775559	0.717924	-1.9906	-1.88304	-2.04322	Heat shock protein 70 (Hsp 70) family protein	Heat shock protein 70 (Hsp 70) family protein	LotjaGi1g1v0535800
Lj0g3v0342909	11.1757	11.871	12.3197	-7.13484	-3.92127	-3.66528	Uncharacterized protein family (UPF0497)	Uncharacterized	LotjaGi1g1v0539200
Lj1g3v3631760	6.74433	6.35274	6.8364	-5.56095	-4.25906	-2.89633	expansin A1	EXPB2	LotjaGi1g1v0606600
Lj1g3v3729250	1.3463	2.42751	2.80599	NA	-1.19269	NA	Ubiquitin-like superfamily protein	Ubiquitin-like superfamily protein	LotjaGi1g1v0616100
Lj1g3v3718130	1.16235	1.40263	1.8205	-1.44271	-1.13826	-0.884925	Disease resistance protein (TIR-NBS-LRR class) family	Disease resistance protein (TIR-NBS-LRR class) family	LotjaGi1g1v0616400
Lj1g3v3975310	1.13201	0.939257	0.920522	-11.4733	-7.3567	-11.2618	Integrase-type DNA-binding superfamily protein	NA	LotjaGi1g1v0643700
Lj1g3v4154950	0.415769	0.803017	1.59419	NA	NA	-0.987478	Ankyrin repeat family protein / BTB/POZ domain-containing protein	NOOT	LotjaGi1g1v0664600
Lj0g3v0202329	3.3224	2.29353	3.53349	-1.20427	NA	NA	basic helix-loop-helix (bHLH) DNA-binding superfamily protein	bHLH	LotjaGi1g1v0667200
Lj1g3v4694380	0.952392	0.694557	0.751559	-0.883428	-0.606172	-0.592075	cellulose synthase-like A3	cellulose synthase-like A3	LotjaGi1g1v0680800
Lj1g3v4483420	1.96105	2.25353	1.43687	-1.43447	-0.953458	NA	Lateral organ boundaries (LOB) domain family protein	ASL18	LotjaGi1g1v0711000
Lj1g3v4317580	3.26999	3.25895	2.98656	-2.72239	-2.63205	-1.6723	Nse4, component of Smc5/6 DNA repair complex	Nse4, component of Smc5/6 DNA repair complex	LotjaGi1g1v0725800
Lj1g3v4918760	1.24555	1.07072	0.566931	NA	-0.813156	NA	alpha/beta-Hydrolases superfamily protein	NA	LotjaGi1g1v0769400
Lj1g3v0414970	0.388227	0.65815	0.887115	NA	-0.717907	NA	NA	Uncharacterized	NA
Lj1g3v0414980	0.386687	0.637036	0.875457	NA	-0.68864	NA	NA	Uncharacterized	NA
Lj1g3v1062530	0.635555	0.219476	1.22577	NA	NA	-1.21229	NA	Uncharacterized	NA
Lj1g3v1786130	3.29036	3.53922	4.47058	-5.39	-3.68578	-3.02102	Thioredoxin superfamily protein	Thioredoxin superfamily protein	NA
Lj1g3v2432890	6.92846	7.25358	7.14834	-2.8598	-2.52071	NA	---NA---	Uncharacterized	NA
Lj1g3v3870660	1.6486	2.9362	3.07267	NA	-2.7468	-2.28255	NA	Uncharacterized	NA
Lj1g3v4139370	-1.34215	2.30431	0.917556	NA	-2.87594	NA	NA	Uncharacterized	NA
Lj1g3v4288790	0.361892	0.545334	0.798812	-0.633673	-0.720774	NA	---NA---	Uncharacterized	NA
Lj1g3v4691540	-0.0340548	1.80938	2.65988	NA	-1.10524	-1.30357	NA	Uncharacterized	NA
Lj1g3v4863110	1.48671	1.47874	1.17823	-0.676678	NA	NA	hypothetical protein AT2G47485	Uncharacterized	NA
Lj0g3v0320499	5.55545	5.03408	5.25239	-3.32153	-2.95059	-2.52749	Pectin lyase-like superfamily protein	Pectin lyase-like superfamily protein	LotjaGi2g1v0002600
Lj2g3v0136400	0.256336	0.91526	0.892019	NA	-0.867483	NA	CHASE domain containing histidine kinase protein	CHASE domain containing histidine kinase protein	LotjaGi2g1v0003400
Lj0g3v0346019	10.5371	10.844	10.5196	-4.35678	-2.93333	-1.48967	O-methyltransferase family protein	O-methyltransferase family protein	LotjaGi2g1v0018600
Lj1g3v2001820	2.82148	3.23285	2.68212	-1.39732	-1.11018	NA	amino acid transporter 1	amino acid transporter 1	LotjaGi2g1v0061800
Lj6g3v1537040	6.47394	5.99358	5.78457	-1.74106	-1.1558	-0.957424	CBS domain protein with a domain protein (DUF21)	CBS1	LotjaGi2g1v0126500
Lj0g3v0095039	5.02986	4.64477	4.591	-2.103	NA	NA	Protein kinase superfamily protein	Protein kinase superfamily protein	LotjaGi2g1v0152900
Lj0g3v0015379	4.40369	5.95754	6.52282	-2.67332	-1.70141	NA	transmembrane protein, putative (Protein of unknown function, DUF599)	plant/F12B17-70 protein	LotjaGi2g1v0169000
Lj2g3v0636810	3.0015	2.97743	3.06457	-1.34199	-1.31514	-0.97058	Leucine-rich repeat protein kinase family protein	Leucine-rich repeat protein kinase family protein	LotjaGi2g1v0191100
Lj2g3v3339140	1.25545	2.73581	2.91063	NA	-1.58193	-0.838004	Pectin lyase-like superfamily protein	Pectin lyase-like superfamily protein	LotjaGi2g1v0191200
Lj2g3v0694690	1.12841	1.23013	1.03616	-0.819343	-0.638805	NA	RING/U-box superfamily protein	RING/U-box superfamily protein	LotjaGi2g1v0202400
Lj2g3v0704910	0.348596	0.833123	1.55263	NA	NA	-0.600596	Bifunctional inhibitor/lipid-transfer protein/seed storage 2S albumin superfamily protein	Bifunctional inhibitor/lipid-transfer protein/seed storage 2S albumin superfamily protein	LotjaGi2g1v0203100
Lj2g3v0855300	1.05415	0.943079	0.590609	-0.738452	NA	NA	RNA-dependent RNA polymerase family protein	RNA-dependent RNA polymerase family protein	LotjaGi2g1v0223900
Lj2g3v1014150	7.90522	8.10876	7.88301	-5.92193	-4.09496	-2.85601	Uncharacterized protein family (UPF0497)	CASP-like protein N24	LotjaGi2g1v0247000
Lj0g3v0146729	2.75262	2.46877	2.27226	-2.89415	-2.57477	-2.73485	WRKY family transcription factor	WRKY family transcription factor	LotjaGi2g1v0307400
Lj2g3v1415130	0.826344	1.65808	1.81023	NA	-0.778683	-0.870935	trichome birefringence-like protein (DUF828)	PC-Esterase	LotjaGi2g1v0322800
Lj2g3v1415410	2.70255	2.77121	3.10088	-2.58366	-1.48518	-1.05414	Protein kinase superfamily protein	Epr3	LotjaGi2g1v0324000
Lj2g3v1536270	1.7982	1.5976	1.52619	-1.06405	-0.799949	NA	AMP-dependent synthetase and ligase family protein	AMP-dependent synthetase and ligase family protein	LotjaGi2g1v0340700
Lj2g3v1550330	1.94958	2.0547	1.79975	-1.72097	-1.99163	-1.61269	Leucine-rich repeat protein kinase family protein	Leucine-rich repeat protein kinase family protein	LotjaGi2g1v0347500
Lj0g3v0313429	0.724194	1.08204	0.990346	-0.602719	NA	NA	exocyst subunit exo70 family protein H7	EXOCYST70H4	LotjaGi2g1v0367600
Lj2g3v1728960	1.65422	1.92482	0.985695	-1.88906	NA	NA	Sec14p-like phosphatidylinositol transfer family protein	Sec14p-like	LotjaGi2g1v0386800
Lj2g3v1925790	2.48746	2.41203	1.98041	-1.02658	-0.856151	NA	Auxin-responsive GH3 family protein	GH3.3	LotjaGi2g1v0405900
Lj2g3v2002400	0.5989	1.09839	0.571541	-0.844276	-0.765305	NA	Plant invertase/pectin methylesterase inhibitor superfamily protein	Plant invertase/pectin methylesterase inhibitor superfamily protein	LotjaGi2g1v0426300
Lj2g3v2088050	1.77268	1.29969	1.44182	-2.03804	-1.93804	-2.02494	Avr9/Cf-9 rapidly elicited protein	Avr9/Cf-9 rapidly elicited protein	LotjaGi2g1v0440500
Lj2g3v0253390	1.65271	1.81128	1.71145	-1.16204	NA	NA	---NA---	Uncharacterized	NA
Lj2g3v0631950	2.48965	2.46532	2.81088	-1.28366	NA	NA	---NA---	Uncharacterized	NA
Lj2g3v1415140	0.858473	1.71264	1.85944	NA	-0.796285	-0.888391	---NA---	Uncharacterized	NA
Lj2g3v3018620	2.85255	3.29393	2.76378	-1.88607	-1.13327	NA	---NA---	Uncharacterized	NA
Lj0g3v0106899	0.884262	1.06785	0.442614	-1.08791	-1.36753	NA	2-oxoglutarate (2OG) and Fe(II)-dependent oxygenase superfamily protein	GA3ox	LotjaGi3g1v0013500
Lj0g3v0106889	0.789824	1.03886	0.378905	NA	-1.38497	NA	2-oxoglutarate (2OG) and Fe(II)-dependent oxygenase superfamily protein	GA3ox(partial?)	LotjaGi3g1v0013500
Lj3g3v0288910	4.55532	5.81471	5.96476	NA	-2.70525	-2.18427	histidine-containing phosphotransmitter 2	histidine-containing phosphotransmitter 2	LotjaGi3g1v0021400
Lj3g3v0370370	0.661264	0.503879	0.559878	NA	NA	NA	GRAS family transcription factor	NA	LotjaGi3g1v0031100
Lj3g3v0720000	7.37355	8.00402	8.08741	-2.81381	NA	NA	defensin-like protein	defensin-like protein	LotjaGi3g1v0086300
Lj3g3v0765990	0.600538	0.573692	0.206185	-0.727049	NA	NA	response regulator 3	NA	LotjaGi3g1v0110700
Lj3g3v0935520	-0.276864	0.413521	1.48809	NA	NA	-1.42173	hypothetical protein AT2G31930	Uncharacterized	LotjaGi3g1v0128700
Lj3g3v0950730	7.20666	8.97974	9.93339	-5.51726	-5.73153	-5.57491	Eukaryotic aspartyl protease family protein	APN1	LotjaGi3g1v0134800
Lj0g3v0331109	1.21955	0.829488	0.757411	-1.40684	NA	NA	Disease resistance protein (TIR-NBS-LRR class) family	NA	LotjaGi3g1v0213100
Lj0g3v0000559	7.99562	8.79043	8.02114	-5.11695	-2.80433	-1.75079	CLAVATA3/ESR-RELATED 6	CLE-RS	LotjaGi3g1v0246500
Lj0g3v0273449	0.829448	0.749045	0.960123	NA	NA	-1.16731	transmembrane protein	transmembrane protein	LotjaGi3g1v0282300
Lj2g3v0126250	8.92015	9.88413	10.3158	-7.23898	-3.05935	-1.74339	nodulin MtN21 /EamA-like transporter family protein	nodulin MtN21 /EamA-like transporter family protein	LotjaGi3g1v0312800
Lj3g3v1855670	6.22483	7.53724	7.75141	-3.79609	-3.60957	-1.5851	nodulin MtN21 /EamA-like transporter family protein	nodulin MtN21 /EamA-like transporter family protein	LotjaGi3g1v0312900
Lj0g3v0341679	3.8873	3.51009	3.40926	-0.761361	NA	NA	flocculation FLO11-like protein	flocculation FLO11-like protein	LotjaGi3g1v0314500
Lj0g3v0070749	1.50759	1.21821	1.17775	-1.1894	NA	NA	Plant invertase/pectin methylesterase inhibitor superfamily protein	Plant invertase/pectin methylesterase inhibitor superfamily protein	LotjaGi3g1v0329000
Lj0g3v0163209	2.89223	2.835	2.75573	NA	NA	-1.4795	NAD(P)-binding Rossmann-fold superfamily protein	NAD(P)-binding Rossmann-fold superfamily protein	LotjaGi3g1v0379900
Lj0g3v0101689	1.41654	1.12064	1.04917	-1.02375	-1.05142	NA	NAD(P)-binding Rossmann-fold superfamily protein	NAD(P)-binding Rossmann-fold superfamily protein	LotjaGi3g1v0379900
Lj3g3v2520080	0.580755	0.4585	1.73079	NA	NA	-1.06629	AP2/B3-like transcriptional factor family protein	AP2/B3-like transcriptional factor family protein	LotjaGi3g1v0405300
Lj3g3v2579340	1.4094	1.27636	0.790011	-0.715088	-0.699976	NA	GRAS family transcription factor	NSP1	LotjaGi3g1v0414350
Lj3g3v2848800	2.15518	2.09975	0.987225	-2.94599	-2.34626	NA	CLAVATA3/ESR-RELATED 6	CLAVATA3/ESR-RELATED 6	LotjaGi3g1v0449330
Lj3g3v2848810	4.96901	7.515	7.89202	NA	-2.49775	-1.82549	---NA---	Uncharacterized	LotjaGi3g1v0449360
Lj0g3v0164379	0.819433	1.22658	1.19897	NA	-0.590198	NA	---NA---	Uncharacterized	LotjaGi3g1v0451600
Lj3g3v2888290	3.19054	4.58374	5.9222	NA	NA	-1.27958	S-locus lectin protein kinase family protein	S-locus lectin protein kinase family protein	LotjaGi3g1v0462000
Lj2g3v1472930	0.410131	0.617442	1.50481	NA	NA	-0.84048	Laccase/Diphenol oxidase family protein	Laccase/Diphenol oxidase family protein	LotjaGi3g1v0489900
Lj3g3v3751920	7.57428	7.85281	8.31094	-5.04408	-3.18773	-2.68281	Plant invertase/pectin methylesterase inhibitor superfamily protein	Plant invertase/pectin methylesterase inhibitor superfamily protein	LotjaGi3g1v0554000
Lj3g3v0755390	1.71467	0.857861	1.44646	-1.9193	NA	NA	---NA---	Uncharacterized	NA
Lj3g3v2236890	0.584446	0.757408	0.550724	-0.886604	NA	NA	NA	Uncharacterized	NA
Lj3g3v2769460	3.86999	3.67077	3.24398	NA	-1.25506	NA	QWRF motif protein (DUF566)	QWRF motif protein (DUF566)	NA
Lj3g3v2848790	2.43507	2.39343	1.22663	-2.8605	-2.28568	NA	NA		NA
Lj4g3v0336320	4.72805	6.30651	7.30498	NA	-3.57058	NA	---NA---	Uncharacterized	LotjaGi4g1v0030900
Lj4g3v0450330	-0.468316	-0.0979762	1.44939	NA	NA	-1.99993	serine carboxypeptidase-like 34	serine carboxypeptidase-like 34	LotjaGi4g1v0052500
Lj4g3v0473070	5.1977	6.8292	7.26843	NA	-3.20579	NA	---NA---	Uncharacterized	LotjaGi4g1v0059500
Lj4g3v0620030	8.82047	9.60801	8.9107	-3.65041	-2.25254	NA	PLC-like phosphodiesterases superfamily protein	PLC-like phosphodiesterases superfamily protein	LotjaGi4g1v0075700
Lj4g3v0620060	8.82054	9.62405	8.92518	-3.65045	-2.24475	NA	PLC-like phosphodiesterases superfamily protein	PLC-like phosphodiesterases superfamily protein	LotjaGi4g1v0075800
Lj4g3v0667980	0.174552	0.541605	1.06785	NA	NA	-0.682859	O-Glycosyl hydrolases family 17 protein	O-Glycosyl hydrolases family 17 protein	LotjaGi4g1v0085200
Lj4g3v0668200	0.829462	0.892451	0.701301	-0.781341	-0.887996	NA	Lateral organ boundaries (LOB) domain family protein	Lateral organ boundaries (LOB) domain family protein	LotjaGi4g1v0086000
Lj4g3v0669710	2.88858	7.45789	8.96428	NA	-4.72076	-3.3878	Cupredoxin superfamily protein	Cupredoxin superfamily protein	LotjaGi4g1v0087200
Lj0g3v0243559	0.109349	0.943257	1.95004	NA	NA	-1.37639	aspartate aminotransferase	aspartate aminotransferase	LotjaGi4g1v0091800
Lj4g3v0744860	1.3255	1.16192	1.07277	-0.865634	-0.705452	NA	D-ribose-binding periplasmic protein	Uncharacterized	LotjaGi4g1v0093900
Lj0g3v0059359	2.45	2.98	4.18	NA	NA	-1.6	Lateral root primordium (LRP) protein-like protein	Lateral root primordium (LRP) protein-like protein	LotjaGi4g1v0123100
Lj0g3v0115499	0.66308	0.795216	0.567348	-0.947894	-0.704712	-0.601859	DUF241 domain protein, putative (DUF241)	DUF241	LotjaGi4g1v0137700
Lj0g3v0088019	7.01726	6.34468	5.85556	-0.895285	-0.633017	NA	Concanavalin A-like lectin protein kinase family protein	Concanavalin A-like lectin protein kinase family protein	LotjaGi4g1v0172700
Lj4g3v1237990	1.3862	2.48678	2.5824	NA	-0.80455	NA	auxin canalization protein (DUF828)	auxin canalization protein (DUF828)	LotjaGi4g1v0201900
Lj4g3v1614650	1.03507	0.788228	0.300902	-0.740841	-0.673621	NA	Integral membrane HPP family protein	NA	LotjaGi4g1v0246100
Lj4g3v1855730	1.4728	1.16272	0.335361	NA	-1.75012	NA	early nodulin-like protein	NA	LotjaGi4g1v0268200
Lj0g3v0284719	1.78744	1.55534	1.52488	-1.01893	NA	NA	Glycosyl hydrolase family protein with chitinase insertion domain-containing protein	Glycosyl hydrolase family protein with chitinase insertion domain-containing protein	LotjaGi4g1v0284200
Lj4g3v1983610	6.3271	7.88506	8.63313	-4.90146	-2.07536	NA	early nodulin-like protein 11	early nodulin 5	LotjaGi4g1v0288300
Lj4g3v2250210	0.441004	1.14646	1.84315	NA	NA	-0.632644	wall-associated receptor kinase galacturonan-binding protein	wall-associated receptor kinase galacturonan-binding protein	LotjaGi4g1v0312000
Lj4g3v2215470	0.17574	0.685361	0.778824	-0.599299	-0.74446	-0.75038	Plant invertase/pectin methylesterase inhibitor superfamily	Plant invertase/pectin methylesterase inhibitor superfamily	LotjaGi4g1v0318900
Lj0g3v0188379	0.164484	0.654265	0.771912	-0.601454	-0.725409	-0.756686	Plant invertase/pectin methylesterase inhibitor superfamily	NPL	LotjaGi4g1v0318900
Lj4g3v2253780	5.20254	5.44922	5.38816	-2.25087	-1.09794	NA	Serine protease inhibitor (SERPIN) family protein	Serine protease inhibitor (SERPIN) family protein	LotjaGi4g1v0333400
Lj4g3v2253610	3.05874	3.49989	3.44995	-1.75271	NA	NA	Serine protease inhibitor (SERPIN) family protein	Serine protease inhibitor (SERPIN) family protein	LotjaGi4g1v0333500
Lj4g3v2313680	1.12782	2.07878	3.81131	NA	NA	-2.01918	hydroxymethylbilane synthase	hydroxymethylbilane synthase	LotjaGi4g1v0340300
Lj4g3v2365210	8.04179	8.63292	8.84568	-1.79986	-1.006	NA	nuclear factor Y, subunit B1	NF-YB18	LotjaGi4g1v0343900
Lj4g3v2618530	2.95986	2.47965	1.84394	-3.49892	-2.43687	NA	plasma membrane intrinsic protein 2A	Multifunctional transport intrinsic membrane protein	LotjaGi4g1v0381200
Lj4g3v2704690	0.993906	1.72705	1.41499	NA	-1.03228	-0.766233	Cupredoxin superfamily protein	Cupredoxin superfamily protein	LotjaGi4g1v0389300
Lj4g3v2846240	0.163848	1.40248	2.49495	NA	NA	-1.53646	ammonium transporter 2	Ammonium transporter	LotjaGi4g1v0414800
Lj4g3v3004080	0.694975	0.856208	0.75299	NA	NA	NA	RING/U-box superfamily protein	NA	LotjaGi4g1v0435600
Lj4g3v3016310	4.22511	4.67999	4.37571	-1.41225	-0.832545	NA	Duplicated homeodomain-like superfamily protein	Myb	LotjaGi4g1v0441000
Lj4g3v3081700	1.07669	4.45379	4.59018	NA	-2.53092	NA	Flavin-binding monooxygenase family protein	Flavin-binding monooxygenase family protein	LotjaGi4g1v0449600
Lj3g3v0950620	0.314525	0.594743	0.554549	-6.83631	-6.05998	-6.32033	---NA---	Uncharacterized	LotjaGi4g1v0456500
Lj6g3v1946440	0.321972	0.639988	0.574687	-7.46476	-6.08068	-5.98356	---NA---	Uncharacterized	LotjaGi4g1v0456500
Lj2g3v3109830	0.336351	0.694067	0.625614	-6.2075	-6.24691	-6.08451	---NA---	Uncharacterized	LotjaGi4g1v0456500
Lj4g3v0643800	1.71467	2.44608	3.41628	NA	NA	-1.30764	NA	Uncharacterized	NA
Lj4g3v1440960	0.248096	1.95115	0.647264	NA	-1.67858	NA	---NA---	Uncharacterized	NA
Lj4g3v1614680	0.690667	0.576969	0.983861	-9.34177	-9.22807	-9.63497	NA	Uncharacterized	NA
Lj4g3v2120300	0.403681	0.825333	0.981384	-0.581503	NA	NA	NA	Uncharacterized	NA
Lj4g3v2140240	8.04357	7.0268	7.15658	-3.03367	-2.01224	-2.11856	NA	Uncharacterized	NA
Lj5g3v0465980	1.54006	1.64522	0.57963	-2.03524	-1.4846	NA	spermidine synthase 3	Spermidine/spermine synthases family	LotjaGi5g1v0046400
Lj5g3v0525250	3.43815	3.47764	2.93829	-1.11066	NA	NA	Glycosyl hydrolase family protein with chitinase insertion domain-containing protein	Glycosyl hydrolase family protein with chitinase insertion domain-containing protein	LotjaGi5g1v0054800
Lj5g3v0526340	3.26554	3.2835	2.80276	-1.13278	NA	NA	Glycosyl hydrolase family protein with chitinase insertion domain-containing protein	Glycosyl hydrolase family protein with chitinase insertion domain-containing protein	LotjaGi5g1v0055200
Lj5g3v0670070	0.116847	0.689395	1.15612	NA	NA	-0.872699	Pectin lyase-like superfamily protein	Pectin lyase-like superfamily protein	LotjaGi5g1v0083600
Lj5g3v0670650	0.770602	1.33547	2.26639	NA	NA	-1.49494	nodulin/glutamine synthase-like protein	nodulin/glutamine synthase-like protein	LotjaGi5g1v0085100
Lj5g3v0841080	8.91328	9.61958	9.74873	-3.70241	-2.09611	-1.33384	nuclear factor Y, subunit A1	NF-YA1	LotjaGi5g1v0106700
Lj0g3v0007899	0.988759	0.83263	0.39814	-0.997304	-0.960003	NA	hypothetical protein AT2G27180	Uncharacterized	LotjaGi5g1v0108000
Lj5g3v1083950	3.31077	4.49704	5.90851	-2.56995	-1.73626	-1.67988	LIGHT-DEPENDENT SHORT HYPOCOTYLS-like protein (DUF640)	LIGHT-DEPENDENT SHORT HYPOCOTYLS 4-like	LotjaGi5g1v0182100
Lj5g3v1699100	2.52822	3.97151	4.38873	NA	-1.62763	NA	sporulation-specific protein	RPG	LotjaGi5g1v0253300
Lj5g3v1697160	2.57722	4.37022	5.80035	NA	NA	-3.2813	---NA---	Uncharacterized	LotjaGi5g1v0257900
Lj5g3v1793520	4.36282	5.50843	5.88018	-3.26534	-2.24805	NA	---NA---	Uncharacterized	LotjaGi5g1v0269700
Lj5g3v2013870	1.20321	0.785353	0.694815	-1.17973	-0.951742	-0.80959	---NA---	(low identidy) Myb	LotjaGi5g1v0301700
Lj5g3v2013880	1.42817	1.0615	0.972844	-1.23646	-1.02917	-0.820731	myb domain protein 55	Myb domain	LotjaGi5g1v0301700
Lj5g3v2027290	4.15258	3.61064	3.1609	-0.625462	NA	NA	MATE efflux family protein	MATE efflux family protein	LotjaGi5g1v0304400
Lj5g3v2063140	1.10456	1.2637	1.34457	-0.885812	-0.709904	NA	Inositol 1,3,4-trisphosphate 5/6-kinase family protein	Inositol 1,3,4-trisphosphate 5/6-kinase family protein	LotjaGi5g1v0319400
Lj5g3v2099560	3.5259	2.47244	1.89427	-2.46304	NA	NA	basic helix-loop-helix (bHLH) DNA-binding superfamily protein	basic helix-loop-helix (bHLH) DNA-binding superfamily protein	LotjaGi5g1v0322700
Lj5g3v2245920	0.263729	0.950167	0.956344	NA	-0.584782	NA	kinesin-like protein	Uncharacterized	LotjaGi5g1v0349900
Lj5g3v0104790	0.653079	0.432091	0.672474	-0.711912	-0.747493	-0.757631	NA	Uncharacterized	NA
Lj5g3v0110930	0.528267	1.02254	0.278937	NA	-1.43377	NA	NA	Uncharacterized	NA
Lj5g3v0525240	3.27412	3.30026	2.76581	-1.07602	NA	NA	NA	Uncharacterized	NA
Lj5g3v0526350	3.17707	3.31467	2.74	-0.980137	NA	NA	NA	Uncharacterized	NA
Lj5g3v0055650	0.330873	0.572016	0.807322	-0.583886	-0.691286	NA	---NA---	Uncharacterized	NA
Lj5g3v0691290	2.17733	1.66995	1.02081	-2.11833	NA	NA	---NA---	Short sequence; no annotation at all	NA
Lj5g3v1174330	6.62258	5.67861	5.51029	-1.44819	-1.19684	-1.2384	NA	Uncharacterized	NA
Lj5g3v1793540	5.08444	7.03487	7.76003	-4.72967	-2.05479	NA	NA	Uncharacterized	NA
Lj5g3v1793650	6.49331	8.53344	9.34798	-6.82744	-2.51219	NA	NA	Uncharacterized	NA
Lj5g3v2057460	1.23373	1.54451	1.48203	-1.09287	-1.09518	NA	NA	Uncharacterized	NA
Lj5g3v2063130	4.0251	4.6041	4.85394	-3.21816	NA	NA	AGAMOUS-like 42	AGL61	NA
Lj6g3v0326350	3.53606	3.4903	2.88956	-3.39155	-2.58472	-1.78121	extra-large GTP-binding protein 3	Uncharacterized	LotjaGi6g1v0043000
Lj1g3v2926300	0.98279	0.85683	0.694406	-0.584554	NA	NA	G patch domain protein	Uncharacterized	LotjaGi6g1v0068500
Lj2g3v2702340	1.2648	2.4042	3.25305	NA	NA	-1.46102	Homeobox-leucine zipper family protein / lipid-binding START domain-containing protein	HD-zip	LotjaGi6g1v0070900
Lj6g3v0523910	1.38707	1.23268	1.7772	-1.88015	NA	NA	---NA---	Uncharacterized	LotjaGi6g1v0073700
Lj0g3v0286809	1.6329	3.37294	4.32556	NA	NA	-0.939982	---NA---	Uncharacterized	LotjaGi6g1v0077500
Lj6g3v0815760	6.86072	7.76669	7.7389	-3.94142	NA	NA	---NA---	Uncharacterized	LotjaGi6g1v0189800
Lj0g3v0306419	10.5952	11.1854	11.3839	-3.73729	-1.13849	NA	Pectin lyase-like superfamily protein	NPL	LotjaGi6g1v0096900
Lj0g3v0254059	5.57933	6.17968	7.13386	NA	NA	-7.13386	HXXXD-type acyl-transferase family protein	HXXXD-type acyl-transferase family protein	LotjaGi6g1v0106600
Lj6g3v0778670	0.901257	0.656929	0.195746	-0.65422	NA	NA	cytochrome P450, family 71, subfamily B, polypeptide 35	Cytochrome P450	LotjaGi6g1v0145800
Lj6g3v0959410	2.82493	3.66341	4.63288	NA	NA	-0.642036	Lateral root primordium (LRP) protein-like protein	Lateral root primordium (LRP) protein-like protein	LotjaGi6g1v0180800
Lj0g3v0131419	2.31614	2.23664	2.62935	-0.698688	NA	NA	UDP-Glycosyltransferase superfamily protein	UDP-Glycosyltransferase superfamily protein	LotjaGi6g1v0194600
Lj0g3v0209939	9.3496	8.44427	7.5556	-1.15856	NA	NA	PLAT/LH2 domain-containing lipoxygenase family protein	Lipoxygenase	LotjaGi6g1v0195200
Lj6g3v1038780	7.13302	6.4989	5.8433	-1.10492	NA	NA	PLAT/LH2 domain-containing lipoxygenase family protein	Lipoxygenase	LotjaGi6g1v0195700
Lj6g3v1090130	0.274219	2.31501	3.52564	NA	NA	-1.86549	---NA---	Uncharacterized	LotjaGi6g1v0208500
Lj5g3v0692300	1.17984	0.776551	0.705811	-1.10663	NA	NA	cytokinin oxidase 4	CKX3	LotjaGi6g1v0231200
Lj6g3v1368640	1.78122	1.86201	1.6025	-1.10173	NA	NA	Protein kinase superfamily protein	Protein kinase superfamily protein	LotjaGi6g1v0241000
Lj6g3v1421130	3.03672	2.54336	2.29793	-0.875193	NA	NA	---NA---	Uncharacterized	LotjaGi6g1v0246600
Lj0g3v0209729	1.76833	2.70466	5.98842	NA	NA	-3.82255	nuclear factor Y, subunit B1	NF-YB18	LotjaGi6g1v0248200
Lj6g3v1826350	1.58258	1.34138	1.10646	NA	-0.788048	NA	Protein kinase superfamily protein	Protein kinase superfamily protein	LotjaGi6g1v0292500
Lj6g3v1901340	1.25482	1.83674	1.38078	-1.11316	-0.77433	NA	Adenosylmethionine decarboxylase family protein	Adenosylmethionine decarboxylase family protein	LotjaGi6g1v0302300
Lj6g3v1931790	2.10778	2.30351	1.722	-1.76174	NA	NA	Integrase-type DNA-binding superfamily protein	PUCHI	LotjaGi6g1v0307900
Lj6g3v2019700	0.480867	1.53578	1.95554	NA	-0.685799	-0.857171	---NA---	Pyridoxine kinase (partial?)	LotjaGi6g1v0330700
Lj6g3v2170750	2.62836	3.00272	3.896	-1.18655	NA	NA	CAP (Cysteine-rich secretory proteins, Antigen 5, and Pathogenesis-related 1 protein) superfamily protein	CAP (Cysteine-rich secretory proteins, Antigen 5, and Pathogenesis-related 1 protein) superfamily protein	LotjaGi6g1v0345300
Lj0g3v0133819	0.65794	1.10782	0.578331	-0.75573	-0.824144	NA	Aldolase-type TIM barrel family protein	Aldolase-type TIM barrel family protein	LotjaGi6g1v0351700
Lj6g3v2218650	0.472999	1.19312	1.13985	NA	-0.664712	NA	Bifunctional inhibitor/lipid-transfer protein/seed storage 2S albumin superfamily protein	Bifunctional inhibitor/lipid-transfer protein/seed storage 2S albumin superfamily protein	LotjaGi6g1v0354100
Lj6g3v1901350	2.12739	2.71913	1.65537	-1.73136	NA	NA	NA	S-adenosylmethionine decarboxylase	NA
Lj6g3v0857930	0.422392	0.655171	0.94708	NA	-0.640433	NA	NA	Uncharacterized	NA
Lj6g3v1953940	0.898019	0.783886	0.541778	-0.643572	NA	NA	NA	NA	NA
Lj6g3v1953970	0.80681	0.750804	0.57896	-0.647674	NA	NA	NA	Uncharacterized	NA
Lj6g3v1953980	0.697672	0.731639	0.432581	-0.59618	NA	NA	NA	Uncharacterized	NA
Lj6g3v1953890	0.706336	0.677871	0.418736	-0.655275	NA	NA	NA	Uncharacterized	NA
Lj6g3v1953910	0.876672	0.910077	0.663082	-0.724312	NA	NA	NA	Uncharacterized	NA
Lj0g3v0002579	1.05554	1.77069	1.29311	NA	-1.45433	NA	NA	Uncharacterized	NA
Lj0g3v0048459	0.838963	0.668458	1.40563	NA	NA	-1.38744	NA	Uncharacterized	NA
Lj0g3v0066009	4.11664	4.27253	5.0708	-5.28579	-3.49526	-2.39702	NA	Uncharacterized	NA
Lj0g3v0066019	4.26601	4.55204	5.45845	-5.41862	-4.13331	-3.47364	Thioredoxin superfamily protein	Thioredoxin superfamily protein	NA
Lj0g3v0068119	1.20805	1.30182	1.33337	-1.44846	NA	NA	---NA---	Uncharacterized	NA
Lj0g3v0114139	2.00983	1.54833	0.948653	-1.88417	-1.99231	-2.09718	CLAVATA3/ESR-RELATED 7	NA	NA
Lj0g3v0156339	4.92885	4.11323	4.30841	-1.63882	NA	NA	NA	Uncharacterized	NA
Lj0g3v0157049	0.648219	0.361651	0.61868	-0.694937	NA	-0.707583	NA	Uncharacterized	NA
Lj0g3v0164389	0.819433	1.22658	1.19897	NA	-0.590198	NA	NA	Uncharacterized	NA
Lj0g3v0170799	1.49747	2.69263	2.98899	NA	-2.50534	-2.19891	NA	Uncharacterized	NA
Lj0g3v0179369	2.23019	1.50423	1.4066	-1.19981	NA	NA	NA	Uncharacterized	NA
Lj0g3v0185799	5.78581	5.20093	4.04464	-1.81329	NA	NA	NA	Uncharacterized	NA
Lj0g3v0185839	4.69095	5.41235	3.5612	NA	-2.7072	NA	NA	Uncharacterized	NA
Lj0g3v0205749	2.33117	2.4347	2.65023	-1.4711	NA	NA	NA	Uncharacterized	NA
Lj0g3v0234189	2.38944	2.12945	1.82468	-0.909506	NA	NA	---NA---	Uncharacterized	NA
Lj0g3v0247009	0.643127	0.527705	0.649428	NA	-1.00211	-0.811627	NA	Uncharacterized	NA
Lj0g3v0280269	3.19111	3.20521	2.85697	-0.996367	NA	NA	NA	Uncharacterized	NA
Lj0g3v0307879	2.97998	4.42204	3.37743	NA	-2.3813	NA	---NA---	Uncharacterized	NA
Lj0g3v0329589	1.78882	1.44495	0.385746	-1.76771	NA	NA	NA	Uncharacterized	NA
Lj0g3v0329599	1.91059	1.48954	0.532457	-1.53802	NA	NA	NA	Uncharacterized	NA
Lj0g3v0331139	1.26037	0.798808	0.5247	-1.36374	-1.02154	-0.8025	NA	NA	NA

## Sheet: Table_S3
Table S2 GO enrichment of DEGs with decreased expression in Ljern1-6
GO name	GO category	P-value
Plasmodesma	CELLULAR_COMPONENT	4.69e-13
Cytosol	CELLULAR_COMPONENT	1.51e-12
Integral component of membrane	CELLULAR_COMPONENT	2.13e-09
Endoplasmic reticulum	CELLULAR_COMPONENT	8.56e-08
Response to salt stress	BIOLOGICAL_PROCESS	9.5e-07
Response to water deprivation	BIOLOGICAL_PROCESS	1.61e-06
Protein serine/threonine kinase activity	MOLECULAR_FUNCTION	4.05e-06
Transcription regulatory region DNA binding	MOLECULAR_FUNCTION	4.05e-06
DNA-binding transcription factor activity	MOLECULAR_FUNCTION	5.27e-06
Response to cold	BIOLOGICAL_PROCESS	8.88e-06
Response to wounding	BIOLOGICAL_PROCESS	1.01e-05
Mitochondrion	CELLULAR_COMPONENT	1.5e-05
Protein autophosphorylation	BIOLOGICAL_PROCESS	1.94e-05
Positive regulation of transcription, DNA-templated	BIOLOGICAL_PROCESS	4.21e-05
Response to karrikin	BIOLOGICAL_PROCESS	6.2e-05
Hormone biosynthetic process	BIOLOGICAL_PROCESS	0.000152
Oxidation-reduction process	BIOLOGICAL_PROCESS	0.000196
Leaf senescence	BIOLOGICAL_PROCESS	0.000196
ATP binding	MOLECULAR_FUNCTION	0.000327
Plant-type cell wall	CELLULAR_COMPONENT	0.000421
Embryo development ending in seed dormancy	BIOLOGICAL_PROCESS	0.000616
Flavonoid biosynthetic process	BIOLOGICAL_PROCESS	0.000794
Response to chitin	BIOLOGICAL_PROCESS	0.000794
Response to reactive oxygen species	BIOLOGICAL_PROCESS	0.00102159
Multicellular organismal reproductive process	BIOLOGICAL_PROCESS	0.00131426
Oxidoreductase activity, acting on paired donors, with incorporation or reduction of molecular oxygen, NAD(P)H as one donor, and incorporation of one atom of oxygen	MOLECULAR_FUNCTION	0.00131426
Jasmonic acid mediated signaling pathway	BIOLOGICAL_PROCESS	0.00149042
Regulation of developmental growth	BIOLOGICAL_PROCESS	0.00149042
Apoplast	CELLULAR_COMPONENT	0.00149042
Negative regulation of transcription, DNA-templated	BIOLOGICAL_PROCESS	0.00169001

## Sheet: Table_S4
Table S4 DEGs with decreased expression in Ljern1-6
Category	MG-20 ID	logFC in WT			logFC in Ljern1-6				Gifu ID	Cluster
		1 dpi	2 dpi	3 dpi	1 dpi	2 dpi	3 dpi				Legend
Cell wall & cytoskeleton	Expansin										LjXgXvXXXXXXX	Duplicated ID in Gifu genome
	Lj1g3v3631760	6.74433	6.35274	6.8364	-5.56095	-4.25906	-2.89633	EXPB2	LotjaGi1g1v0606600	cluster_7	LjXgXvXXXXXXX	Not found in Gifu
	Lj2g3v2598860	1.40465	1.98588	2.20681	#N/A	-0.753634	#N/A	Expansin	LotjaGi1g1v0089200	cluster_2
	Pectin lyase
	Lj0g3v0306419	10.5952	11.1854	11.3839	-3.73729	-1.13849	#N/A	NPL	LotjaGi6g1v0096900	cluster_2
	Lj0g3v0320499	5.55545	5.03408	5.25239	-3.32153	-2.95059	-2.52749	Pectin lyase-like superfamily protein	LotjaGi2g1v0002600	cluster_7
	Lj2g3v3339140	1.25545	2.73581	2.91063	#N/A	-1.58193	-0.838004	Pectin lyase-like superfamily protein	LotjaGi2g1v0191200	cluster_2
	Lj5g3v0670070	0.116847	0.689395	1.15612	#N/A	#N/A	-0.872699	Pectin lyase-like superfamily protein	LotjaGi5g1v0083600	cluster_2
	Plant invertase/pectin methylesterase inhibitor superfamily protein
	Lj3g3v3751920	7.57428	7.85281	8.31094	-5.04408	-3.18773	-2.68281	Plant invertase/pectin methylesterase inhibitor superfamily protein	LotjaGi3g1v0554000	cluster_2
	Lj0g3v0070749	1.50759	1.21821	1.17775	-1.1894	#N/A	#N/A	Plant invertase/pectin methylesterase inhibitor superfamily protein	LotjaGi3g1v0329000	cluster_7
	Lj2g3v2002400	0.5989	1.09839	0.571541	-0.844276	-0.765305	#N/A	Plant invertase/pectin methylesterase inhibitor superfamily protein	LotjaGi2g1v0426300	cluster_7
	Lj4g3v2215470	0.17574	0.685361	0.778824	-0.599299	-0.74446	-0.75038	Plant invertase/pectin methylesterase inhibitor superfamily	LotjaGi4g1v0318900	cluster_2
	Lj0g3v0188379	0.164484	0.654265	0.771912	-0.601454	-0.725409	-0.756686	Plant invertase/pectin methylesterase inhibitor superfamily	LotjaGi4g1v0318900	cluster_2
	Cellulose synthase
	Lj1g3v4694380	0.952392	0.694557	0.751559	-0.883428	-0.606172	-0.592075	cellulose synthase-like A3	LotjaGi1g1v0680800	cluster_7
	Formin homolog
	Lj1g3v0416320	3.79472	3.98069	4.04726	-0.991622	-1.0932	-1.20381	Formin homolog	LotjaGi1g1v0184800	cluster_7
	RopGEF
	Lj1g3v2659360	1.129	0.406	0.239	-0.77	#N/A	#N/A	GopGEF3	LotjaGi1g1v0476400	cluster_7
Disease/ stress/ defense	Disease/ stress resistance
	Lj0g3v0331109	1.21955	0.829488	0.757411	-1.40684	#N/A	#N/A	Disease resistance protein (TIR-NBS-LRR class) family	LotjaGi3g1v0213100	cluster_7
	Lj1g3v3718130	1.16235	1.40263	1.8205	-1.44271	-1.13826	-0.884925	Disease resistance protein (TIR-NBS-LRR class) family	LotjaGi1g1v0616400	cluster_2
	Lj2g3v2088050	1.77268	1.29969	1.44182	-2.03804	-1.93804	-2.02494	Avr9/Cf-9 rapidly elicited protein	LotjaGi2g1v0440500	cluster_7
	Lj1g3v0627590	2.81396	4.29252	4.31054	-3.48212	-4.61409	-2.96197	PLANT CADMIUM RESISTANCE 2	LotjaGi1g1v0245300	cluster_2
	HSP
	Lj1g3v1787650	1.34616	2.06646	3.05438	#N/A	#N/A	-2.0748	HSP20-like chaperones superfamily protein	LotjaGi1g1v0369200	cluster_2
	Lj1g3v3218000	0.607939	0.775559	0.717924	-1.9906	-1.88304	-2.04322	Heat shock protein 70 (Hsp 70) family protein	LotjaGi1g1v0535800	cluster_7
	PC-Esterase
	Lj2g3v1415130	0.826344	1.65808	1.81023	#N/A	-0.778683	-0.870935	PC-Esterase	LotjaGi2g1v0322800	cluster_2
Phytohormone	GA
	Lj0g3v0106899	0.884262	1.06785	0.442614	-1.08791	-1.36753	#N/A	GA3ox1	LotjaGi3g1v0013500	cluster_7
	Auxin
	Lj2g3v1925790	2.48746	2.41203	1.98041	-1.02658	-0.856151	#N/A	GH3.3	LotjaGi2g1v0405900	cluster_7
	Lj4g3v1237990	1.3862	2.48678	2.5824	#N/A	-0.80455	#N/A	auxin canalization protein (DUF828)	LotjaGi4g1v0201900	cluster_2
	Lj2g3v3222870	2.03058	2.03178	1.25969	-1.87206	-1.68424	#N/A	IAMT1	LotjaGi1g1v0023500	cluster_7
	Cytokinin
	Lj0g3v0068199	1.79537	2.10409	2.10369	-1.03793	#N/A	#N/A	LOG4	LotjaGi1g1v0427900
	Lj5g3v0692300	1.17984	0.776551	0.705811	-1.10663	#N/A	#N/A	CKX3	LotjaGi6g1v0231200	cluster_7
	Lj3g3v0288910	4.55532	5.81471	5.96476	#N/A	-2.70525	-2.18427	histidine-containing phosphotransmitter 2	LotjaGi3g1v0021400	cluster_2
Metabolism & electron transfer	early nodulin
	Lj4g3v1983610	6.3271	7.88506	8.63313	-4.90146	-2.07536	#N/A	early nodulin-like protein 11	LotjaGi4g1v0288300	cluster_2
	NodGS-like
	Lj5g3v0670650	0.770602	1.33547	2.26639	#N/A	#N/A	-1.49494	nodulin/glutamate-ammonia ligase-like protein (kazusa)	LotjaGi5g1v0085100	cluster_2
	Peroxidase
	Lj1g3v0672110	0.907662	0.788709	0.424224	#N/A	-0.587439	#N/A	Peroxidase superfamily protein	LotjaGi1g1v0199600	cluster_7
	Lj2g3v2411360	1.44311	1.00231	0.817555	-0.611372	#N/A	#N/A	Peroxidase superfamily protein	LotjaGi1g1v0109100	cluster_7
	CP450
	Lj6g3v0778670	0.901257	0.656929	0.195746	-0.65422	#N/A	#N/A	Cytochrome P450	LotjaGi6g1v0145800	cluster_7
	Lj2g3v3149350	1.70936	1.32528	1.23851	-0.763845	#N/A	#N/A	CP450	LotjaGi1g1v0033800	cluster_7
	Chitinase
	Lj0g3v0284719	1.78744	1.55534	1.52488	-1.01893	#N/A	#N/A	Glycosyl hydrolase family protein with chitinase insertion domain-containing protein	LotjaGi4g1v0284200	cluster_7
	Lipoxygenase
	Lj6g3v1038780	7.13302	6.4989	5.8433	-1.10492	#N/A	#N/A	Lipoxygenase	LotjaGi6g1v0195700	cluster_7
	Xanthine/uracil permease family protein
	Lj0g3v0104079	1.67457	1.78171	1.38755	-0.949965	-0.58324	#N/A	Xanthine/uracil permease family protein	LotjaGi1g1v0234500	cluster_7
	AMP-dependent synthetase and ligase family protein
	Lj2g3v1536270	1.7982	1.5976	1.52619	-1.06405	-0.799949	#N/A	AMP-dependent synthetase and ligase family protein	LotjaGi2g1v0340700	cluster_7
	O-methyltransferase family protein
	Lj0g3v0346019	10.5371	10.844	10.5196	-4.35678	-2.93333	-1.48967	O-methyltransferase family protein	LotjaGi2g1v0018600	cluster_7
	Thioredoxin superfamily protein
	Lj1g3v0183010	1.86178	1.21438	0.597313	-0.838072	-0.640696	#N/A	Thioredoxin superfamily protein	LotjaGi1g1v0137600	cluster_7
	Lj0g3v0066019	4.26601	4.55204	5.45845	-5.41862	-4.13331	-3.47364	Thioredoxin superfamily protein	NA	cluster_2
	Lj1g3v1786130	3.29036	3.53922	4.47058	-5.39	-3.68578	-3.02102	Thioredoxin superfamily protein	NA	cluster_2
	spermidine synthase
	Lj5g3v0465980	1.54006	1.64522	0.57963	-2.03524	-1.4846	#N/A		LotjaGi5g1v0046400	cluster_7
	Adenosylmethionine decarboxylase family protein
	Lj6g3v1901340	1.25482	1.83674	1.38078	-1.11316	-0.77433	#N/A	Adenosylmethionine decarboxylase family protein	LotjaGi6g1v0302300	cluster_2
	NADP-binding
	Lj0g3v0163209	2.89223	2.835	2.75573	#N/A	#N/A	-1.4795	NAD(P)-binding Rossmann-fold superfamily protein	LotjaGi3g1v0379900	cluster_7
	Lj0g3v0101689	1.41654	1.12064	1.04917	-1.02375	-1.05142	#N/A	NAD(P)-binding Rossmann-fold superfamily protein	LotjaGi3g1v0379900	cluster_7
	Lj4g3v3081700	1.07669	4.45379	4.59018	#N/A	-2.53092	#N/A	Flavin-binding monooxygenase family protein	LotjaGi4g1v0449600	cluster_2
	Cupredoxin superfamily protein
	Lj4g3v2704690	0.993906	1.72705	1.41499	#N/A	-1.03228	-0.766233	Cupredoxin superfamily protein	LotjaGi4g1v0389300	cluster_7
	Lj4g3v0669710	2.88858	7.45789	8.96428	#N/A	-4.72076	-3.3878	Cupredoxin superfamily protein	LotjaGi4g1v0087200	cluster_2
	Peptidase
	Lj3g3v0950730	7.20666	8.97974	9.93339	-5.51726	-5.73153	-5.57491	APN1	LotjaGi3g1v0134800	cluster_2
	UDP-Glycosyltransferase superfamily protein
	Lj0g3v0137049	0.969579	0.987384	1.32535	-0.909281	#N/A	#N/A	UDP-Glycosyltransferase	LotjaGi1g1v0121800	cluster_2
	Acyl-transferase
	Lj0g3v0254059	5.57933	6.17968	7.13386	#N/A	#N/A	-7.13386	HXXXD-type acyl-transferase family protein	LotjaGi6g1v0106600	cluster_2
	Lj0g3v0217099	0.527244	0.656835	0.529266	-1.27796	-1.06362	-1.09891	HXXXD-type acyl-transferase family protein	LotjaGi1g1v0513700	cluster_2
	Lipid transfer protein
	Lj6g3v2218650	0.472999	1.19312	1.13985	#N/A	-0.664712	#N/A	Bifunctional inhibitor/lipid-transfer protein/seed storage 2S albumin superfamily protein	LotjaGi6g1v0354100	cluster_2
	Lj2g3v0704910	0.348596	0.833123	1.55263	#N/A	#N/A	-0.600596	Bifunctional inhibitor/lipid-transfer protein/seed storage 2S albumin superfamily protein	LotjaGi2g1v0203100	cluster_2
	Laccase
	Lj1g3v4139440	0.112488	1.16976	2.41793	#N/A	#N/A	-0.882527	Laccase/Diphenol oxidase family protein	LotjaGi1g1v0081300	cluster_2
	Lj2g3v1472930	0.410131	0.617442	1.50481	#N/A	#N/A	-0.84048	Laccase/Diphenol oxidase family protein	LotjaGi3g1v0489900	cluster_2
	Lj2g3v2136010	-0.0731947	0.0708875	2.16167	#N/A	#N/A	-1.94163	Laccase/Diphenol oxidase family protein	LotjaGi1g1v0133700	cluster_2
	Glycosyl hydrolases
	Lj4g3v0667980	0.174552	0.541605	1.06785	#N/A	#N/A	-0.682859	O-Glycosyl hydrolases family 17 protein	LotjaGi4g1v0085200	cluster_2
	hydroxymethylbilane synthase
	Lj4g3v2313680	1.12782	2.07878	3.81131	#N/A	#N/A	-2.01918	hydroxymethylbilane synthase	LotjaGi4g1v0340300	cluster_2
	serine carboxypeptidase-like
	Lj4g3v0450330	-0.468316	-0.0979762	1.44939	#N/A	#N/A	-1.99993	serine carboxypeptidase-like 34	LotjaGi4g1v0052500	cluster_2
	aspartate aminotransferase
	Lj0g3v0243559	0.109349	0.943257	1.95004	#N/A	#N/A	-1.37639	aspartate aminotransferase	LotjaGi4g1v0091800	cluster_2
	3-ketoacyl-CoA synthase
	Lj1g3v2296500	0.767643	0.544567	1.66046	#N/A	#N/A	-2.02298	3-ketoacyl-CoA synthase	LotjaGi1g1v0437300	cluster_2
Nucleotide regulation	Transcription regulation
	Lj2g3v3373100	5.60214	5.57585	5.55727	-1.76951	-0.768011	#N/A	NIN	LotjaGi1g1v0001500	cluster_7
	Lj4g3v3016310	4.22511	4.67999	4.37571	-1.41225	-0.832545	#N/A	Myb	LotjaGi4g1v0441000
	Lj5g3v0841080	8.91328	9.61958	9.74873	-3.70241	-2.09611	-1.33384	NF-YA1	LotjaGi5g1v0106700	cluster_2
	Lj1g3v4483420	1.96105	2.25353	1.43687	-1.43447	-0.953458	#N/A	ASL18	LotjaGi1g1v0711000	cluster_7
	Lj3g3v2579340	1.4094	1.27636	0.790011	-0.715088	-0.699976	#N/A	NSP1	LotjaGi3g1v0414350	cluster_7
	Lj4g3v2365210	8.04179	8.63292	8.84568	-1.79986	-1.006	#N/A	NF-YB18	LotjaGi4g1v0343900	cluster_2
	Lj5g3v2099560	3.5259	2.47244	1.89427	-2.46304	#N/A	#N/A	basic helix-loop-helix (bHLH) DNA-binding superfamily protein	LotjaGi5g1v0322700	cluster_7
	Lj5g3v2013880	1.42817	1.0615	0.972844	-1.23646	-1.02917	-0.820731	Myb domain	LotjaGi5g1v0301700	cluster_7
	Lj0g3v0202329	3.3224	2.29353	3.53349	-1.20427	#N/A	#N/A	bHLH	LotjaGi1g1v0667200
	Lj0g3v0146729	2.75262	2.46877	2.27226	-2.89415	-2.57477	-2.73485	WRKY family transcription factor	LotjaGi2g1v0307400	cluster_7
	Lj5g3v2013870	1.20321	0.785353	0.694815	-1.17973	-0.951742	-0.80959	(low identidy) Myb	LotjaGi5g1v0301700	cluster_7
	Lj6g3v1931790	2.10778	2.30351	1.722	-1.76174	#N/A	#N/A	PUCHI	LotjaGi6g1v0307900	cluster_7
	Lj5g3v2063130	4.0251	4.6041	4.85394	-3.21816	#N/A	#N/A	MADS-box		cluster_2
	Lj2g3v2702340	1.2648	2.4042	3.25305	#N/A	#N/A	-1.46102	wuschel-related homeobox protein	LotjaGi6g1v0070900	cluster_2
	Lj0g3v0209729	1.76833	2.70466	5.98842	#N/A	#N/A	-3.82255	NF-YB18	LotjaGi6g1v0248200	cluster_2
	Lj3g3v2520080	0.580755	0.4585	1.73079	#N/A	#N/A	-1.06629	AP2/B3-like transcriptional factor family protein	LotjaGi3g1v0405300	cluster_2
	LRP-like
	Lj0g3v0059359	2.4486	2.98408	4.17863	#N/A	#N/A	-1.59531	Lateral root primordium (LRP) protein-like protein	LotjaGi4g1v0123100	cluster_2
	LOB domain
	Lj4g3v0668200	0.829462	0.892451	0.701301	-0.781341	-0.887996	#N/A	Lateral organ boundaries (LOB) domain family protein	LotjaGi4g1v0086000	cluster_7
	Lj1g3v2581160	0.0355574	0.910097	1.55548	#N/A	-1.31996	-1.06108	Lateral organ boundaries (LOB) domain family protein	LotjaGi1g1v0463000	cluster_2
	DNA repair/ replicate/ recombination
	Lj1g3v4317580	3.26999	3.25895	2.98656	-2.72239	-2.63205	-1.6723	Nse4, component of Smc5/6 DNA repair complex	LotjaGi1g1v0725800	cluster_7
	Lj3g3v2921000	2.25735	2.34789	2.72038	-1.27959	#N/A	#N/A	replication factor-A carboxy-terminal domain protein	LotjaGi1g1v0243400	cluster_2
	RNA-binding
	Lj1g3v1062540	0.869506	0.99239	1.03723	-0.785023	-0.821991	#N/A	RNA-binding	LotjaGi1g1v0295300	cluster_7
Signalling	Protein kinase
	Lj2g3v1415410	2.70255	2.77121	3.10088	-2.58366	-1.48518	-1.05414	Epr3	LotjaGi2g1v0324000	cluster_2
	Lj0g3v0095039	5.02986	4.64477	4.591	-2.103	#N/A	#N/A	Protein kinase superfamily protein	LotjaGi2g1v0152900	cluster_7
	Lj1g3v0415090	6.17525	6.7186	7.26423	-1.85377	-2.40783	-2.10255	ALB1	LotjaGi1g1v0182900	cluster_2
	Lj2g3v0636810	3.0015	2.97743	3.06457	-1.34199	-1.31514	-0.97058	Leucine-rich repeat protein kinase family protein	LotjaGi2g1v0191100	cluster_7
	Lj5g3v2063140	1.10456	1.2637	1.34457	-0.885812	-0.709904	#N/A	Inositol 1,3,4-trisphosphate 5/6-kinase family protein	LotjaGi5g1v0319400	cluster_2
	Lj2g3v1550330	1.94958	2.0547	1.79975	-1.72097	-1.99163	-1.61269	Leucine-rich repeat protein kinase family protein	LotjaGi2g1v0347500	cluster_7
	Lj6g3v1826350	1.58258	1.34138	1.10646	#N/A	-0.788048	#N/A	Protein kinase superfamily protein	LotjaGi6g1v0292500	cluster_7
	Lj3g3v2888290	3.19054	4.58374	5.9222	#N/A	#N/A	-1.27958	S-locus lectin protein kinase family protein	LotjaGi3g1v0462000	cluster_2
	Lj6g3v2019700	0.480867	1.53578	1.95554	#N/A	-0.685799	-0.857171	Pyridoxine kinase (partial?)	LotjaGi6g1v0330700	cluster_2
	Lj2g3v0136400	0.256336	0.91526	0.892019	#N/A	-0.867483	#N/A	CHASE domain containing histidine kinase protein	LotjaGi2g1v0003400	cluster_2
	Lectin
	Lj0g3v0254789	2.57722	4.37022	5.80035	#N/A	#N/A	-3.2813	Concanavalin A-like lectin protein kinase family protein	LotjaGi5g1v0257900	cluster_2
	PLC-like phosphodiesterases superfamily protein
	Lj4g3v0620030	8.82047	9.60801	8.9107	-3.65041	-2.25254	#N/A	PLC-like phosphodiesterases superfamily protein	LotjaGi4g1v0075700	cluster_2
	Lj4g3v0620060	8.82054	9.62405	8.92518	-3.65045	-2.24475	#N/A	PLC-like phosphodiesterases superfamily protein	LotjaGi4g1v0075800	cluster_7
	Transmembrane
	Lj1g3v1732400	1.0928	3.36609	2.71798	#N/A	-1.72213	#N/A	heptahelical transmembrane protein2	LotjaGi1g1v0362100	cluster_2
	Lj0g3v0273449	0.829448	0.749045	0.960123	#N/A	#N/A	-1.16731	transmembrane protein	LotjaGi3g1v0282300	cluster_7
	Ankyrin repeat
	Lj1g3v4154950	0.415769	0.803017	1.59419	#N/A	#N/A	-0.987478	NOOT	LotjaGi1g1v0664600	cluster_2
	Galactosyltransferase
	Lj0g3v0297749	0.0282108	0.607047	0.670513	#N/A	-0.678452	#N/A	Galactosyltransferase family protein	LotjaGi1g1v0151000	cluster_2
Transporter/ channel	HPP family (maybe transporters; according to Pfam)
	Lj4g3v1614650	1.03507	0.788228	0.300902	-0.740841	-0.673621	#N/A		LotjaGi4g1v0246100	cluster_7
	Aquaporin-like superfamily protein
	Lj1g3v3318570	5.21478	5.12592	4.86147	-2.90903	-2.27814	-2.08642	Aquaporin-like superfamily protein	LotjaGi1g1v0145800	cluster_7
	Transporter
	Lj3g3v1855560	8.98104	9.98545	10.4403	-6.54759	-3.16052	-1.81504	nodulin MtN21 /EamA-like transporter family protein	LotjaGi3g1v0312800	cluster_2
	Lj1g3v2001820	2.82148	3.23285	2.68212	-1.39732	-1.11018	#N/A	amino acid transporter 1	LotjaGi2g1v0061800	cluster_7
	Lj4g3v2618530	2.95986	2.47965	1.84394	-3.49892	-2.43687	#N/A	Multifunctional transport intrinsic membrane protein	LotjaGi4g1v0381200	cluster_7
	Lj3g3v2261380	1.09461	1.22081	1.12382	-0.629801	#N/A	#N/A	sulfate transporter 1;2	LotjaGi3g1v0362200	cluster_7
	Lj3g3v2681670	7.01566	7.52992	7.71059	-2.79334	#N/A	#N/A	NPF8.6	LotjaGi1g1v0123500	cluster_2
	Lj3g3v1855670	6.22483	7.53724	7.75141	-3.79609	-3.60957	-1.5851	nodulin MtN21 /EamA-like transporter family protein	LotjaGi3g1v0312900	cluster_2
	Lj4g3v2846240	0.163848	1.40248	2.49495	#N/A	#N/A	-1.53646	Ammonium transporter	LotjaGi4g1v0414800	cluster_2
Others	early nodulin
	Lj0g3v0117029	2.44378	1.83916	1.79284	-2.30964	-2.96228	-2.07167	WRKY DNA-binding protein 9	LotjaGi2g1v0307400	cluster_7
	Lj0g3v0133819	0.65794	1.10782	0.578331	-0.75573	-0.824144	#N/A	Aldolase-type TIM barrel family protein	LotjaGi6g1v0351700	cluster_7
	QWRF motif protein (DUF566)
	Lj3g3v2769460	3.86999	3.67077	3.24398	#N/A	-1.25506	#N/A	QWRF motif protein (DUF566)	NA	cluster_7
	Serine protease inhibitor (SERPIN) family protein
	Lj4g3v2253610	3.05874	3.49989	3.44995	-1.75271	#N/A	#N/A	Serine protease inhibitor (SERPIN) family protein	LotjaGi4g1v0333500	cluster_2
	Exocyst
	Lj0g3v0313429	0.724194	1.08204	0.990346	-0.602719	#N/A	#N/A	EXOCYST70H4	LotjaGi2g1v0367600	cluster_2
	CBS domain
	Lj6g3v1537040	6.47394	5.99358	5.78457	-1.74106	-1.1558	-0.957424	CBS1	LotjaGi2g1v0126500	cluster_7
	RING/U-box superfamily protein
	Lj2g3v0694690	1.12841	1.23013	1.03616	-0.819343	-0.638805	#N/A	RING/U-box superfamily protein	LotjaGi2g1v0202400	cluster_7
	F-box
	Lj0g3v0335709	2.97169	3.56692	3.82317	-2.39752	-2.58572	-2.13239	F-box protein	LotjaGi1g1v0297800	cluster_2
	Coiled-coil protein
	Lj5g3v1699100	2.52822	3.97151	4.38873	#N/A	-1.62763	#N/A	RPG	LotjaGi5g1v0253300	cluster_2
	Ubiquitin-like superfamily protein
	Lj1g3v3729250	1.3463	2.42751	2.80599	#N/A	-1.19269	#N/A	Ubiquitin-like superfamily protein	LotjaGi1g1v0616100	cluster_2
	CLE-RS
	Lj0g3v0114139	2.00983	1.54833	0.948653	-1.88417	-1.99231	-2.09718	CLE-RS	NA	cluster_7
	Lj0g3v0000559	7.99562	8.79043	8.02114	-5.11695	-2.80433	-1.75079	CLE-RS	LotjaGi3g1v0246500	cluster_7
	Lj3g3v2848800	2.15518	2.09975	0.987225	-2.94599	-2.34626	#N/A	CLAVATA3/ESR-RELATED 6	LotjaGi3g1v0449330	cluster_7

## Sheet: Table_S5
	Table S5 DEGs down-regulated in ern1-6 and nin-2
Category	Gene ID	FC in ern1-6	FC in nin-2	Annotation
Cell wall	Lj0g3v0306419	0.07	0.57	NPL
Cytokinin	Lj5g3v0692300	0.46	0.69	CKX3
Defense	Lj1g3v0627590	0.09	0.64	protein PLANT CADMIUM RESISTANCE 2-like
DNA/RNA binding	Lj1g3v4317580	0.15	0.32	non-structural maintenance of chromosomes element 4 homolog A-like
	Lj1g3v1062540	0.58	0.6	RNA-binding protein 38-like
Early nodulin	Lj4g3v2618530	0.09	0.05	aquaporin nip1-2
	Lj4g3v2618540	0.09	0.05	aquaporin nip1-2
	Lj4g3v1983610	0.03	0.22	early nodulin 5
Electron transport	Lj0g3v0066019	0.02	0.55	glutaredoxin-like family
	Lj1g3v1786130	0.02	0.55	glutaredoxin-like family
Enzyme	Lj3g3v0950730	0.02	0.56	APN1
	Lj0g3v0346019	0.05	0.59	isoliquiritigenin 2'-O-methyltransferase
	Lj3g3v3751920	0.03	0.53	pectinesterase inhibitor 4-like
	Lj3g3v3751930	0.03	0.53	pectinesterase inhibitor 4-like
	Lj4g3v0620030	0.08	0.27	PI-PLC X domain-containing protein At5g67130-like
	Lj4g3v0620060	0.08	0.27	PI-PLC X domain-containing protein At5g67130-like
	Lj6g3v1901340	0.46	0.64	S-adenosylmethionine decarboxylase
	Lj5g3v0465980	0.24	0.37	Spermidine/spermine synthases family
Gibberellins	Lj0g3v0106899	0.47	0.31	GA3
Protein kinase	Lj2g3v1415410	0.16	0.28	Epr3
	Lj5g3v2063140	0.54	0.28	Inositol-tetrakisphosphate 1-kinase
	Lj2g3v0636810	0.39	0.5	Putative LRR receptor-like serine/threonine-protein kinase
	Lj0g3v0095039	0.23	0.65	Serine-threonine/tyrosine-protein kinase catalytic domain
TF	Lj5g3v2063130	0.11	0.41	agamous-like MADS-box protein AGL62
	Lj5g3v0841080	0.08	0.02	NF-YA1
	Lj4g3v2365210	0.29	0.41	NF-YB18
	Lj6g3v1931790	0.3	0.15	PUCHI
	Lj4g3v3016310	0.38	0.13	Transcription factor MYBS3
Transporter	Lj0g3v0008099	0.37	0.29	Cationic amino acid transporter
	Lj1g3v2001820	0.37	0.29	Cationic amino acid transporter
Others	Lj2g3v0694690	0.57	0.61	RING FINGER CONTAINING PROTEIN
	Lj6g3v1537040	0.3	0.12	CBS-domain

## Sheet: Table_S6
	Table S6 DEGs down-regulated in ern1-6 but not nin-2
Category	Gene ID	FC in ern1-6	FC in nin-2	Annotation
Actin	Lj1g3v0416320	0.5	0.87	FH8
Auxin	Lj2g3v3222870	0.27	1.21	IAMT1
Cell wall	Lj1g3v3631760	0.02	1.79	EXPB2
CP450	Lj2g3v3149350	0.58	1.28	cytochrome P450 716B1-like
	Lj6g3v0778670	0.63	1.01	putative cytochrome P450
Cytokinin	Lj0g3v0068199	0.48	1.29	LOG4
Defense	Lj0g3v0203979	0.35	1.08	disease resistance protein (TIR-NBS-LRR class)
	Lj1g3v3218000	0.25	1.18	heat shock cognate 70 kDa protein 2
	Lj6g3v1038780	0.47	1	Lipoxygenase2; JA defense related
	Lj1g3v3718130	0.37	1.08	Toll/interleukin-1 receptor homology (TIR) domain
DNA/RNA binding	Lj0g3v0163209	0.54	1.25	NAD(P)-binding domain
	Lj0g3v0101689	0.49	1.13	NAD(P)-binding Rossmann-fold domains
	Lj3g3v2921000	0.41	1.25	replication factor A protein 1-like
Early nodulin	Lj5g3v0878400	0.13	0.97	Nodulin 26 like
Enzyme	Lj0g3v0254789	0.16	1.22	Legume lectin
	Lj2g3v1536270	0.48	0.87	4-coumarate--CoA ligase-like 6
	Lj1g3v4694380	0.54	1.22	glucomannan 4-beta-mannosyltransferase 9
	Lj2g3v2411360	0.65	1.06	Plant peroxidase
	Lj0g3v0320499	0.1	1.04	probable pectinesterase 29
	Lj4g3v2253610	0.29	1	SERPIN,Protease inhibitor I4
	Lj0g3v0254059	0.02	1.11	spermidine coumaroyl-CoA acyltransferase-like
Membrane	Lj1g3v2659360	0.58	1.31	ROPGEF3
TF	Lj5g3v2013870	0.44	1.18	LAF1
	Lj4g3v0668200	0.58	0.88	LBD4
	Lj0g3v0117029	0.2	1.13	probable WRKY transcription factor 61
	Lj5g3v2099560	0.18	0.93	transcription factor bHLH84-like
Transporter	Lj2g3v0126250	0.01	1.03	MtN21
	Lj3g3v1855670	0.07	0.97	MtN21
	Lj3g3v1855560	0.01	1.03	MtN21
	Lj3g3v2681670	0.14	0.93	protein NRT1/ PTR FAMILY 8.1-like
Others	Lj3g3v2769460	0.49	1.51	QWRF motif-containing protein 3
	Lj5g3v0104790	0.61	1.02	Transposon protein, putative
